# Supplementary material for: Use of a novel multicomponent reaction under high pressure for the efficient construction of a new pyridazino[5,4,3-de][1,6]naphthyridine tricyclic system
Source: Royal Society of Chemistry journal article supplement (doi:10.1039/c6ra19535k), 2016-01-01
Supplement: c6ra19535k1.pdf [file c6ra19535k1.pdf]

<sup>1</sup>H spectra Mostafa MS Ph in DMSO

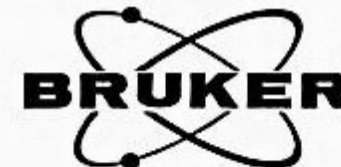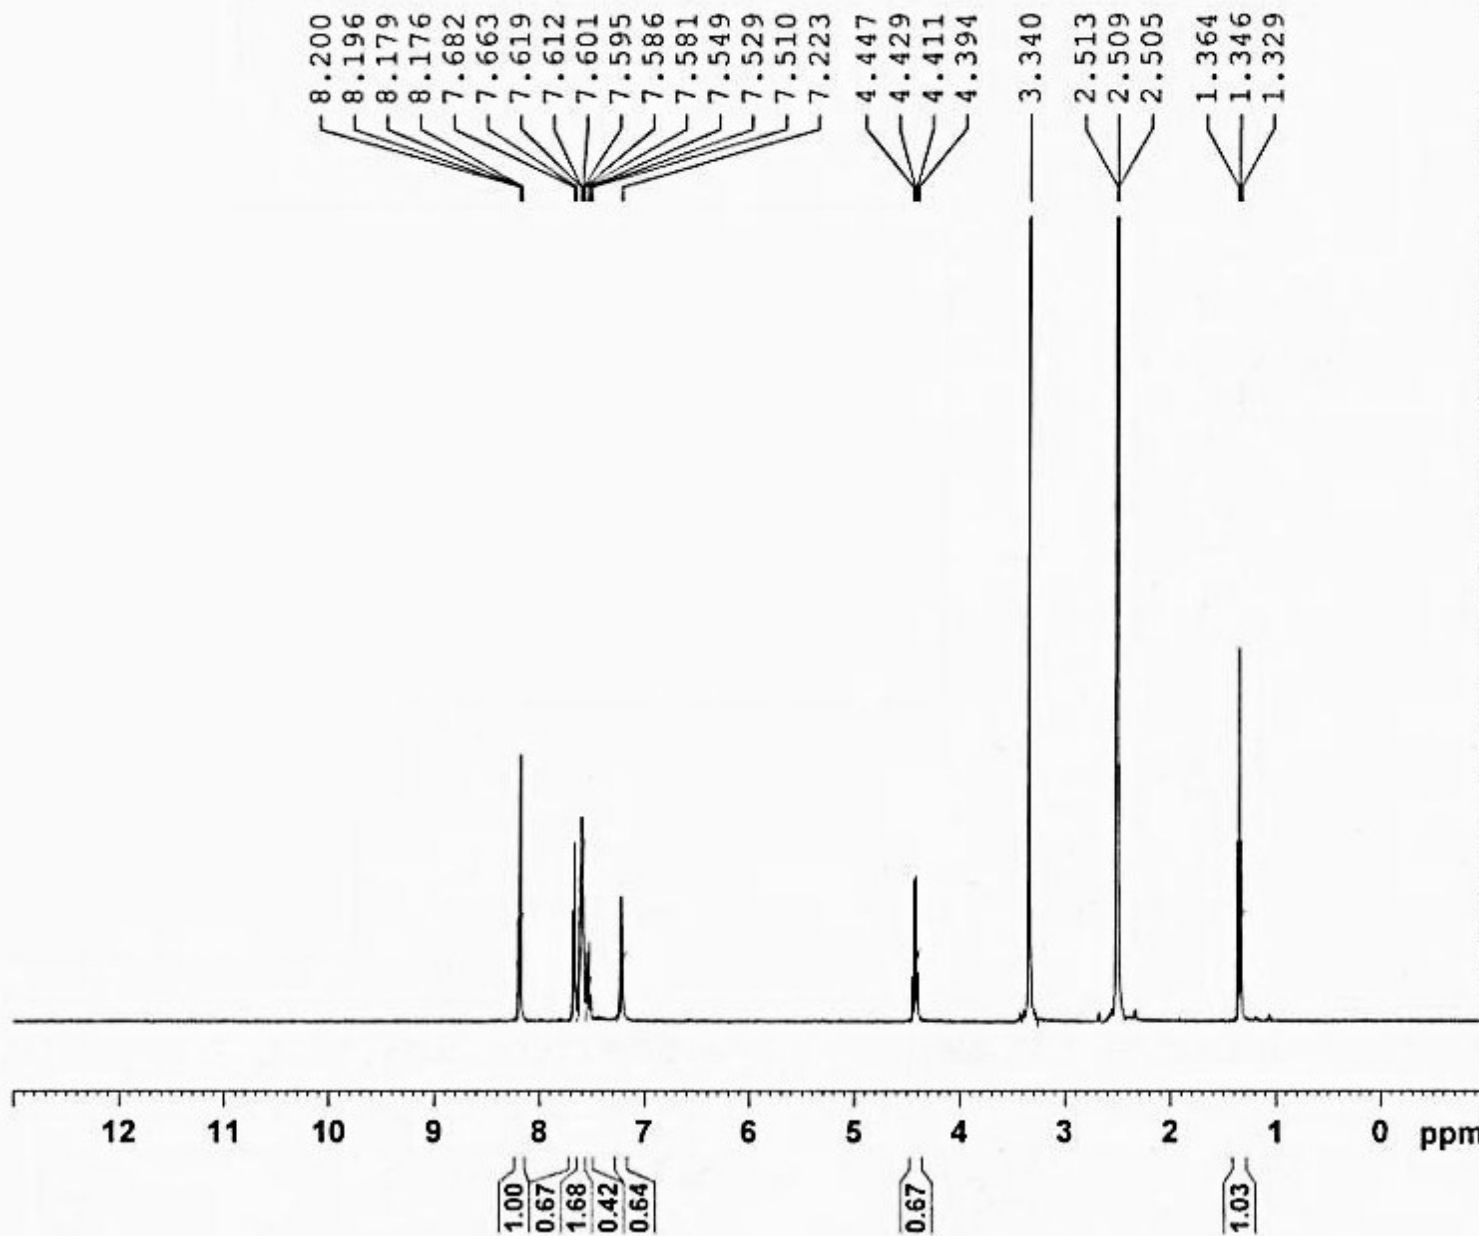

Current Data Parameters

NAME Ms Ph  
EXPNO 4  
PROCNO 1

F2 - Acquisition Parameters

Date\_ 20151204  
Time\_ 6.01  
INSTRUM spect  
PROBHD 5 mm QNP 1H/13  
PULPROG zg30  
TD 65536  
SOLVENT DMSO  
NS 16  
DS 2  
SWH 8278.146 Hz  
FIDRES 0.126314 Hz  
AQ 3.9584243 sec  
RG 812.7  
DW 60.400 usec  
DE 6.00 usec  
TE 295.6 K  
D1 1.00000000 sec  
TD0 1

----- CHANNEL f1 -----

NUC1 1H  
P1 10.40 usec  
PL1 -2.00 dB  
SFO1 400.1324710 MHz

F2 - Processing parameters

SI 32768  
SF 400.1300000 MHz  
WDW EM  
SSB 0  
LB 0.30 Hz  
GB 0  
PC 1.00

<sup>1</sup>H NMR for the compound 9a

<sup>1</sup>H spectra Mostafa MS Ph in DMSO

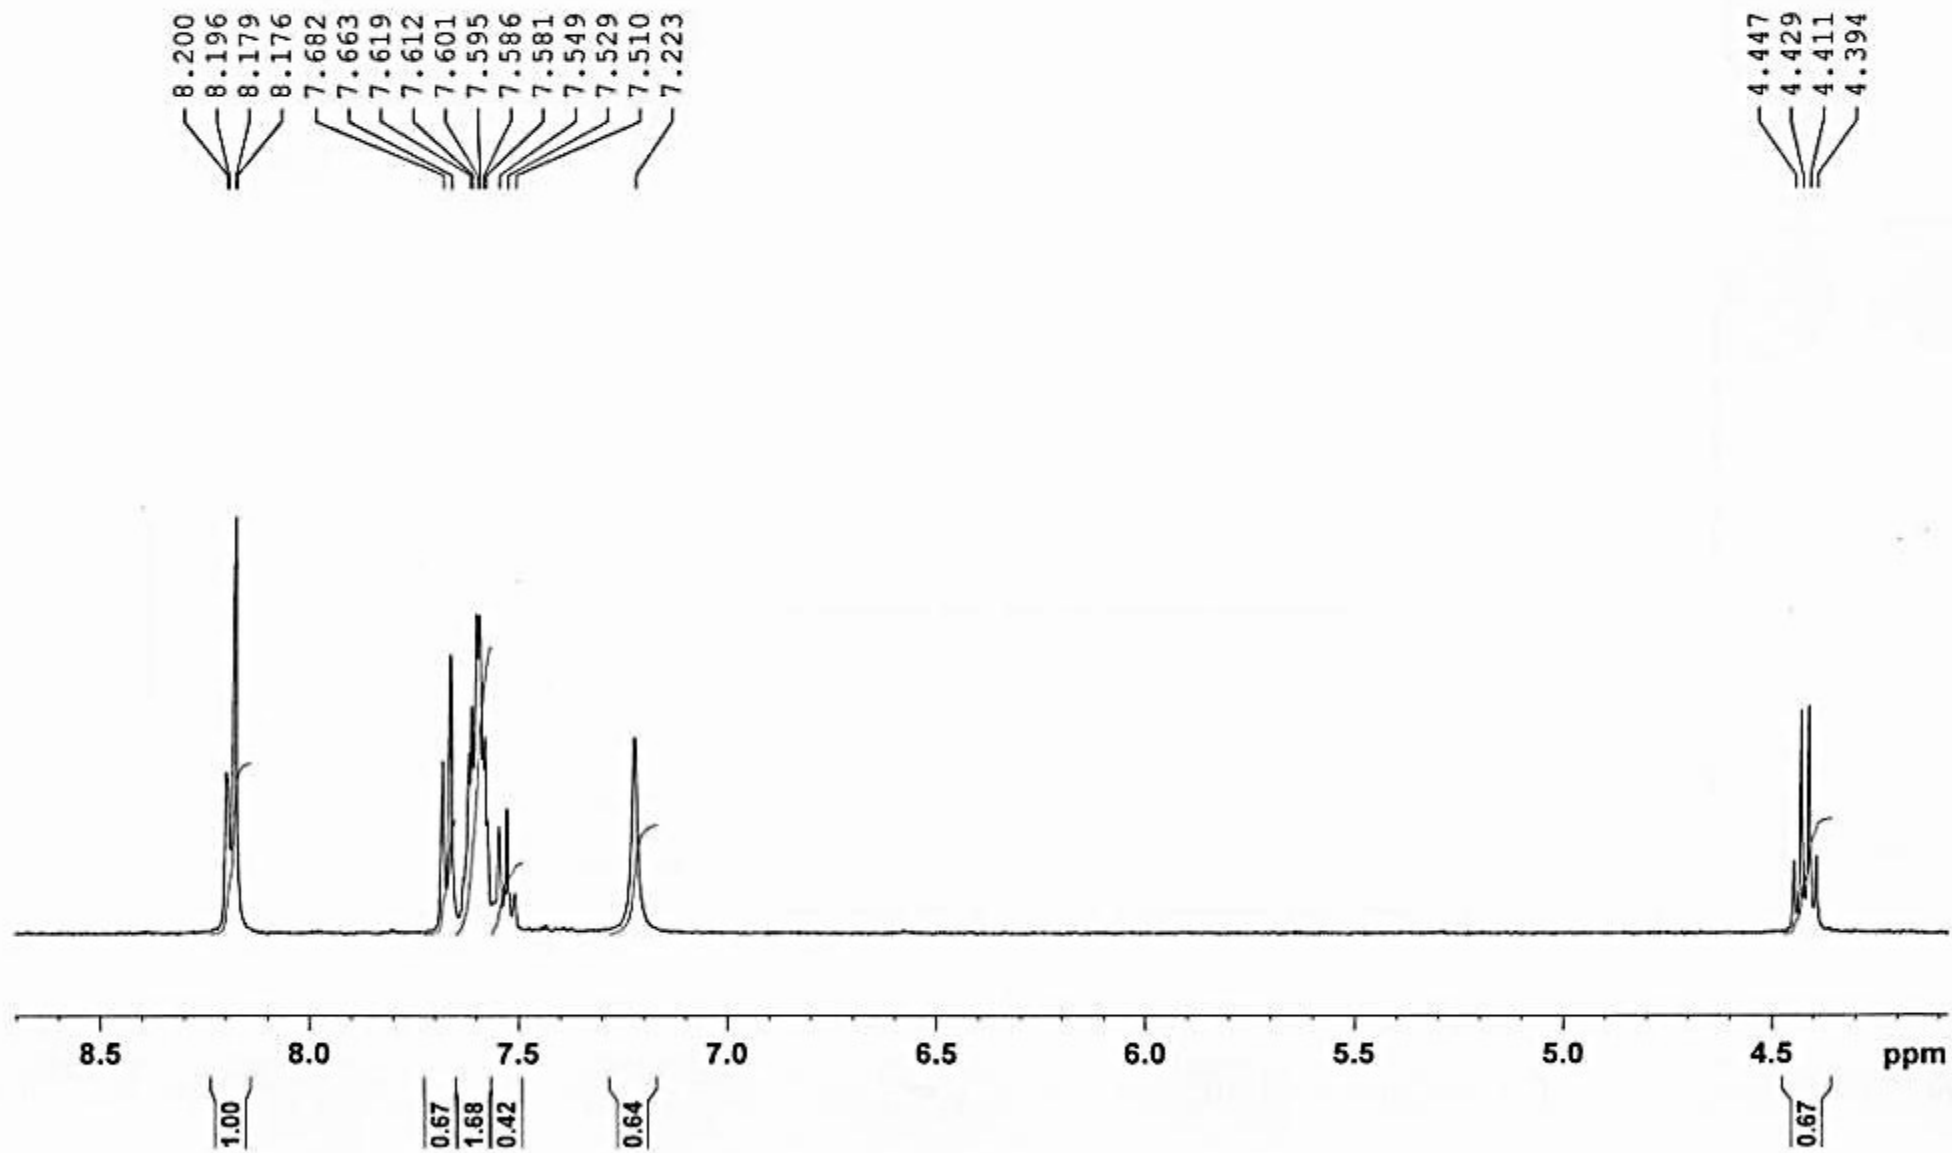

<sup>1</sup>H NMR for the compound 9a

<sup>13</sup>C decoupled spectra Mostafa MsPh in DMSO

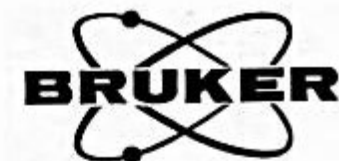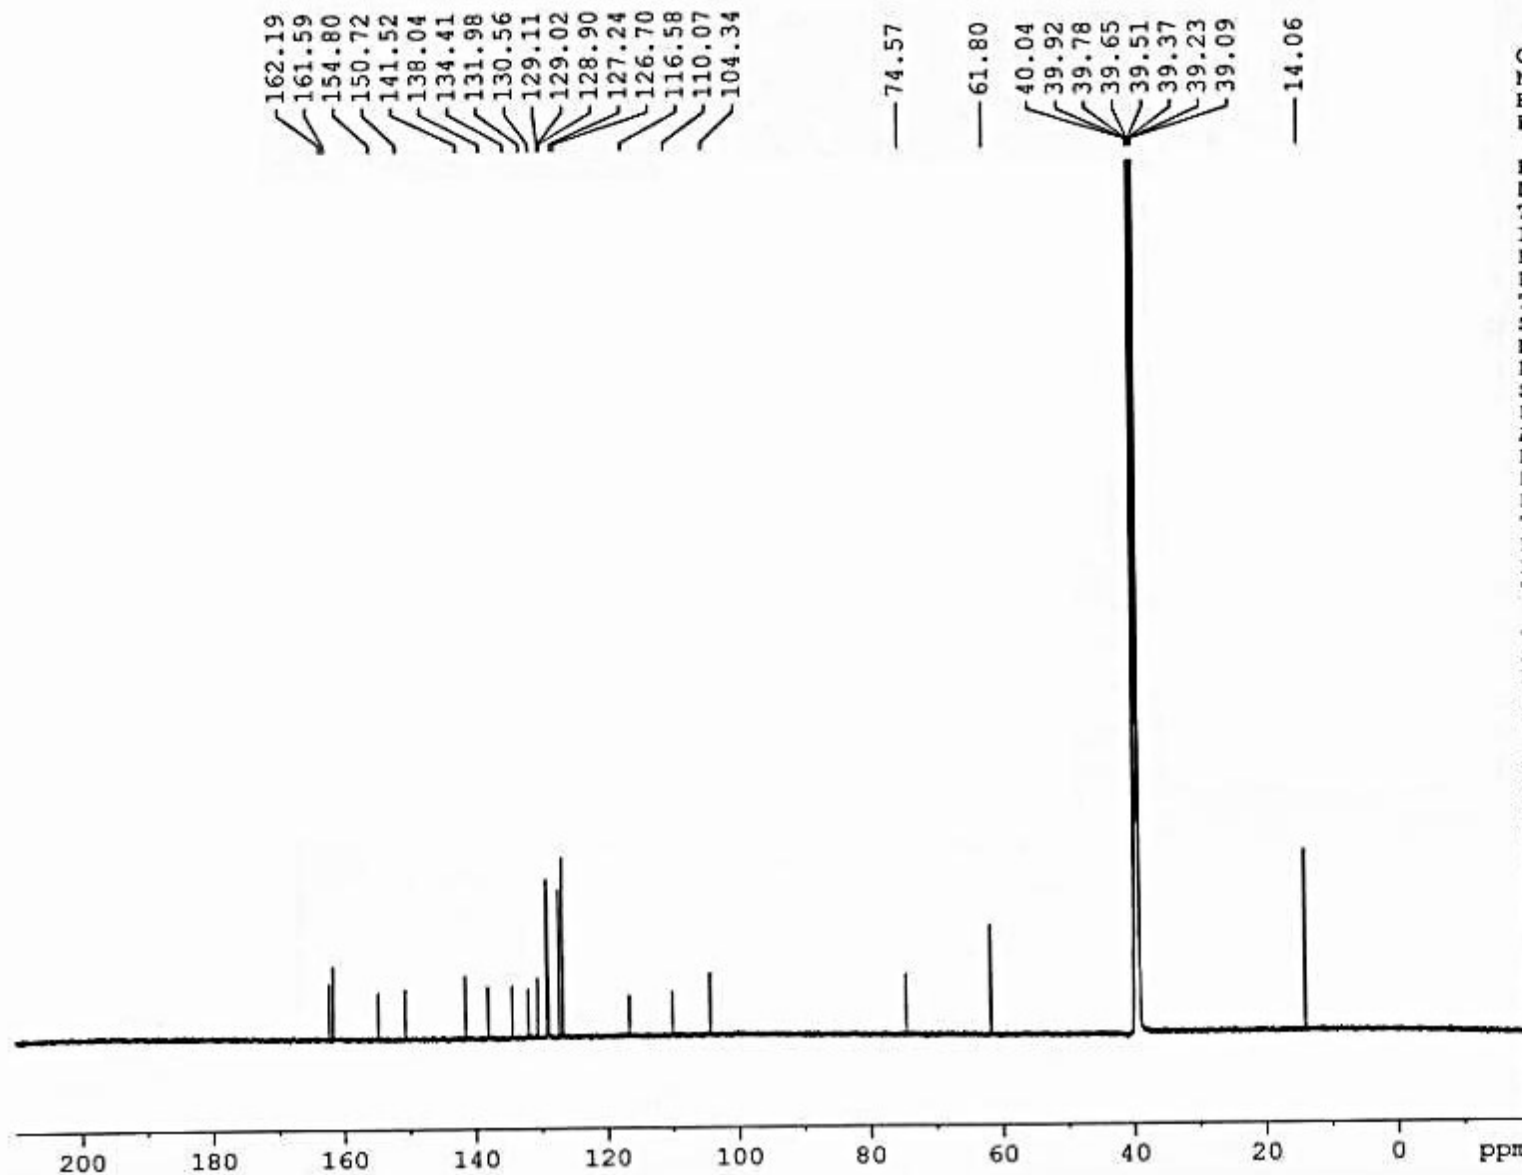

Current Data Parameters  
 NAME MSPH-13C  
 EXPNO 1  
 PROCNO 1

F2 - Acquisition Parameters  
 Date 20160705  
 Time 11.34  
 INSTRUM spect  
 PROBHD 5 mm PABBO BB-  
 PULPROG zgpg30  
 TD 65536  
 SOLVENT DMSO  
 NS 30720  
 DS 4  
 SWH 36057.691 Hz  
 FIDRES 0.550197 Hz  
 AQ 0.9087659 sec  
 RG 203  
 DW 13.867 usec  
 DE 50.00 usec  
 TE 298.0 K  
 D1 2.00000000 sec  
 D11 0.03000000 sec  
 TDO 1

----- CHANNEL f1 -----  
 SFO1 150.9178979 MHz  
 NUC1 13C  
 P1 8.80 usec  
 PLW1 78.13500214 W

----- CHANNEL f2 -----  
 SFO2 600.1324005 MHz  
 NUC2 1H  
 CPDPRG[2] waltz65  
 PCPD2 70.00 usec  
 PLW2 27.82500076 W  
 PLW12 0.63804001 W  
 PLW13 0.31264001 W

F2 - Processing parameters  
 SI 32768  
 SF 150.9028808 MHz  
 WDW EM  
 SSB 0  
 LB 1.00 Hz  
 GB 0  
 PC 1.40

<sup>13</sup>C NMR for the compound 9a

$^{13}\text{C}$  decoupled spectra Mostafa MsPh in DMSO

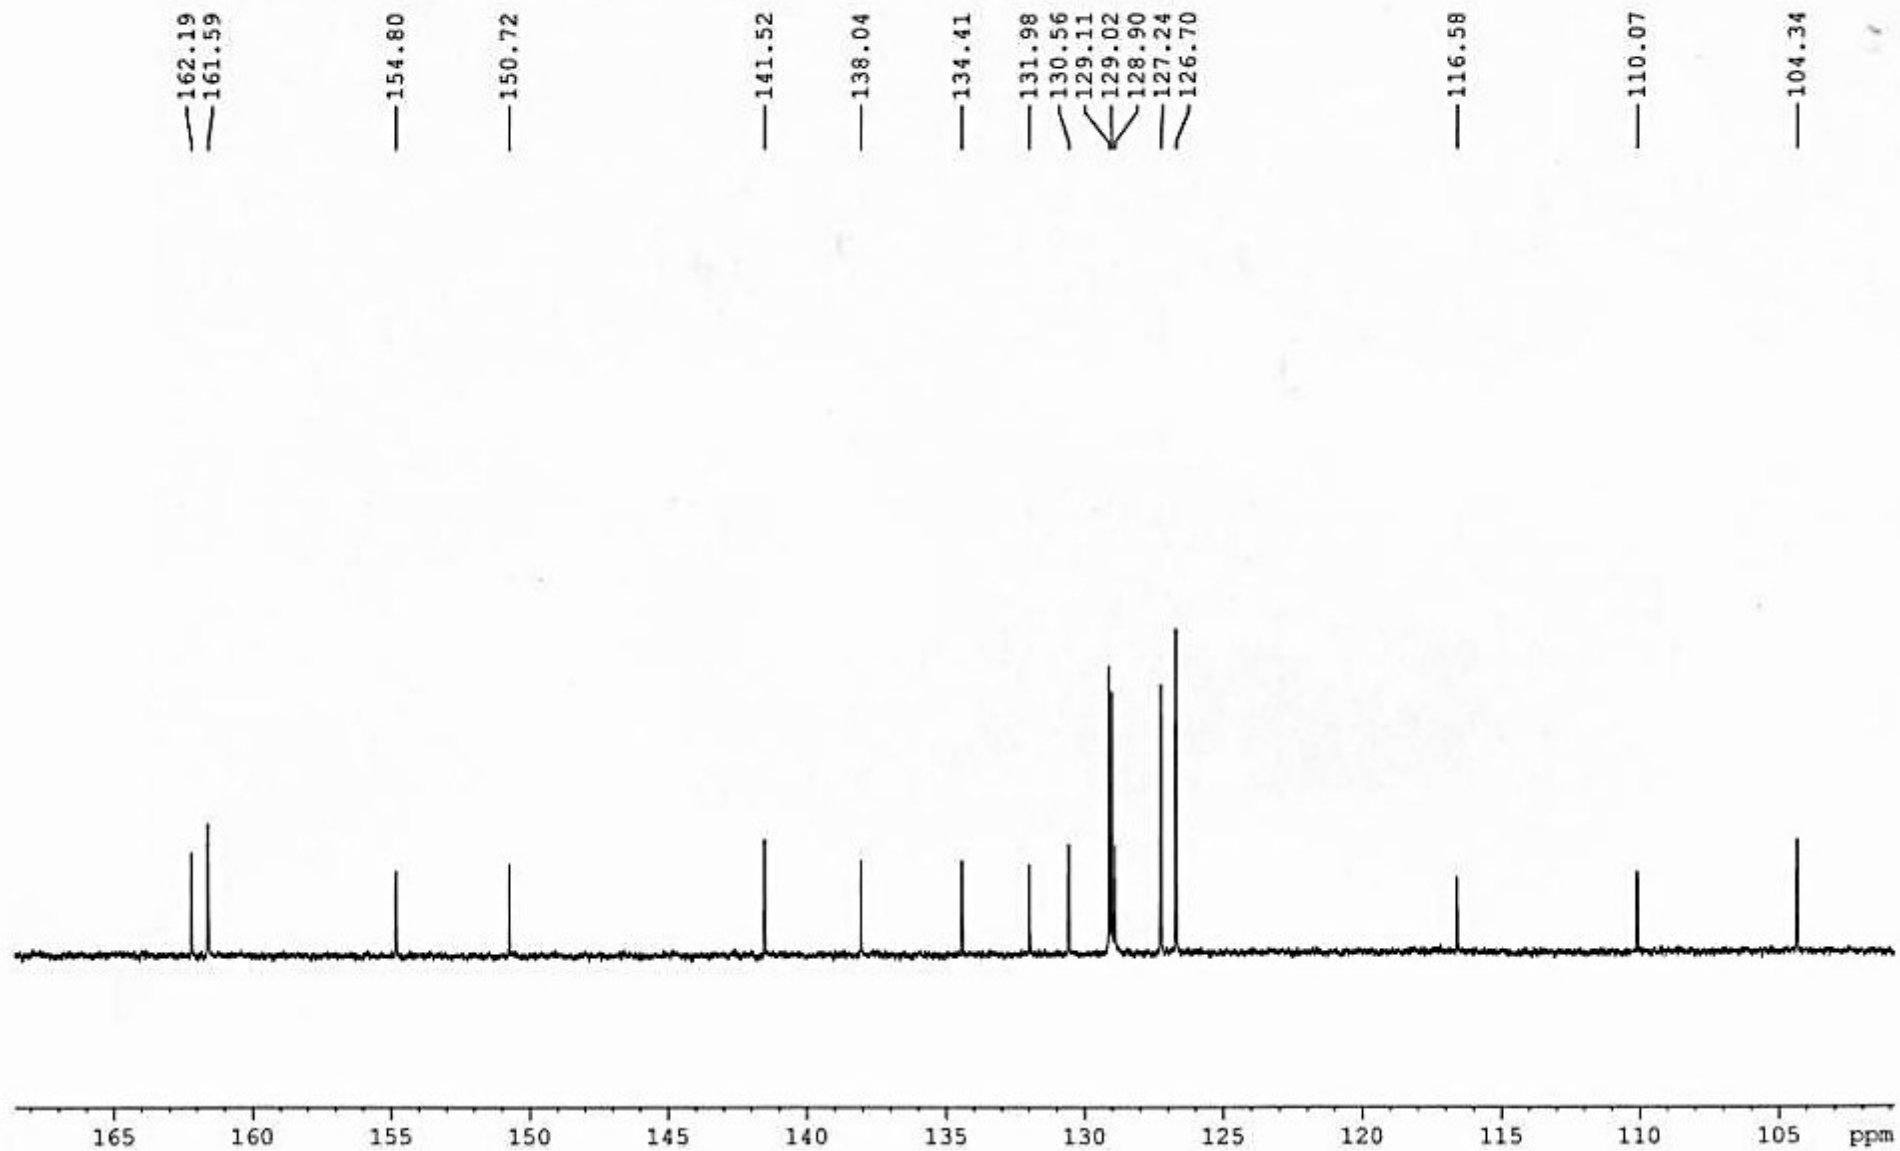

$^{13}\text{C}$  NMR for the compound **9a**

C:\Xcalibur\Data\saleh\MS-Ph  
11/4/2015 12:59:16 PM

GC MS DFS- Thermo  
Project No: GS01/03

MS-Ph

MS-Ph #182 RT: 7.83 AV: 1 NL: 8.56E6  
T: + c EI Full ms [ 49.50-1000.50]

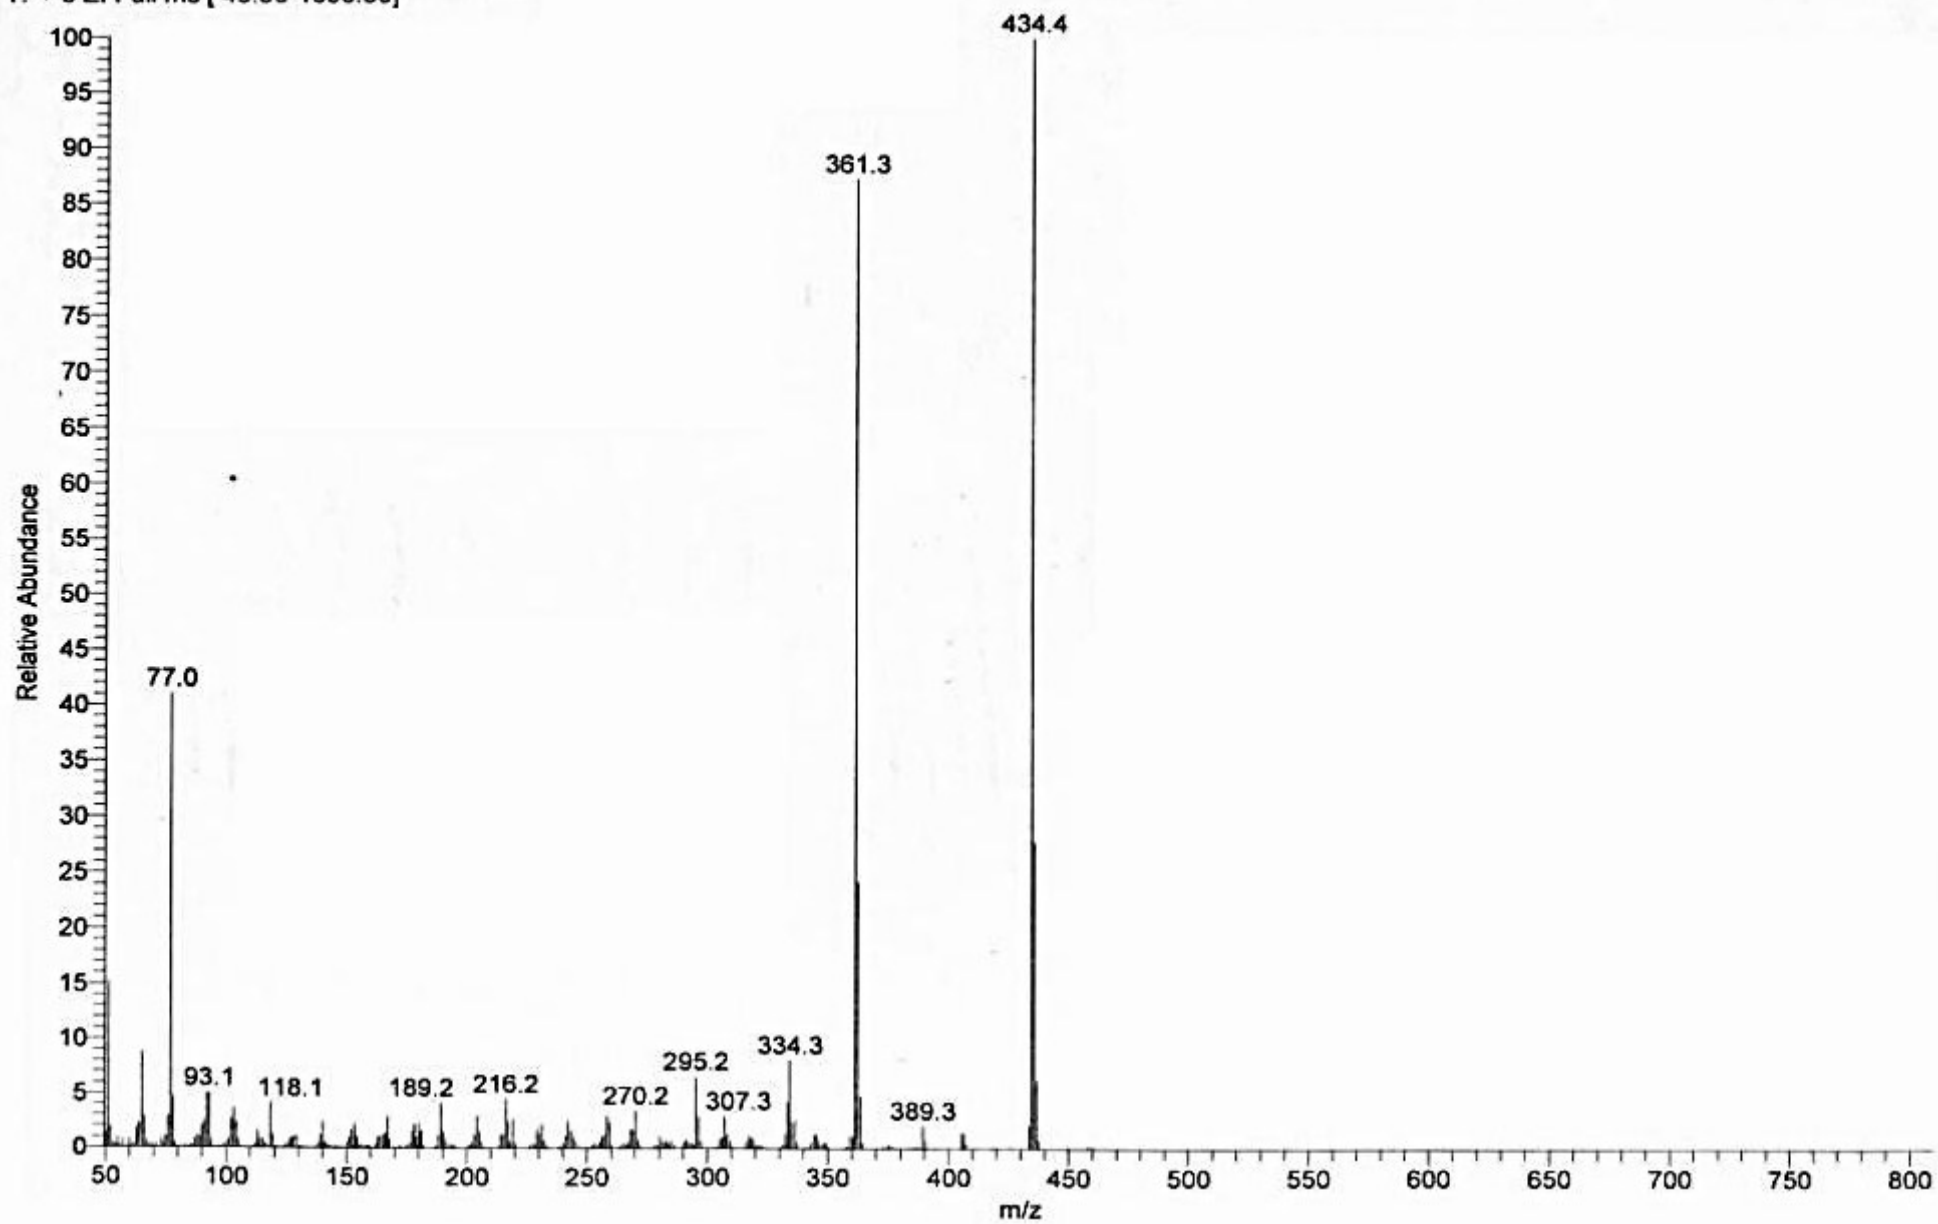

Mass spectra for the compound 9a

C:\Xcalibur\Data\saleh\HRMS-MSPH-c1  
11/25/2015 8:46:57 AM

GC MS DFS- Thermo  
Project No: GS01/03

HRMS-MSPH-c1 #46 RT: 8.24 AV: 1 NL: 7.39E5  
T: + c EI Full ms [ 399.50-460.50]

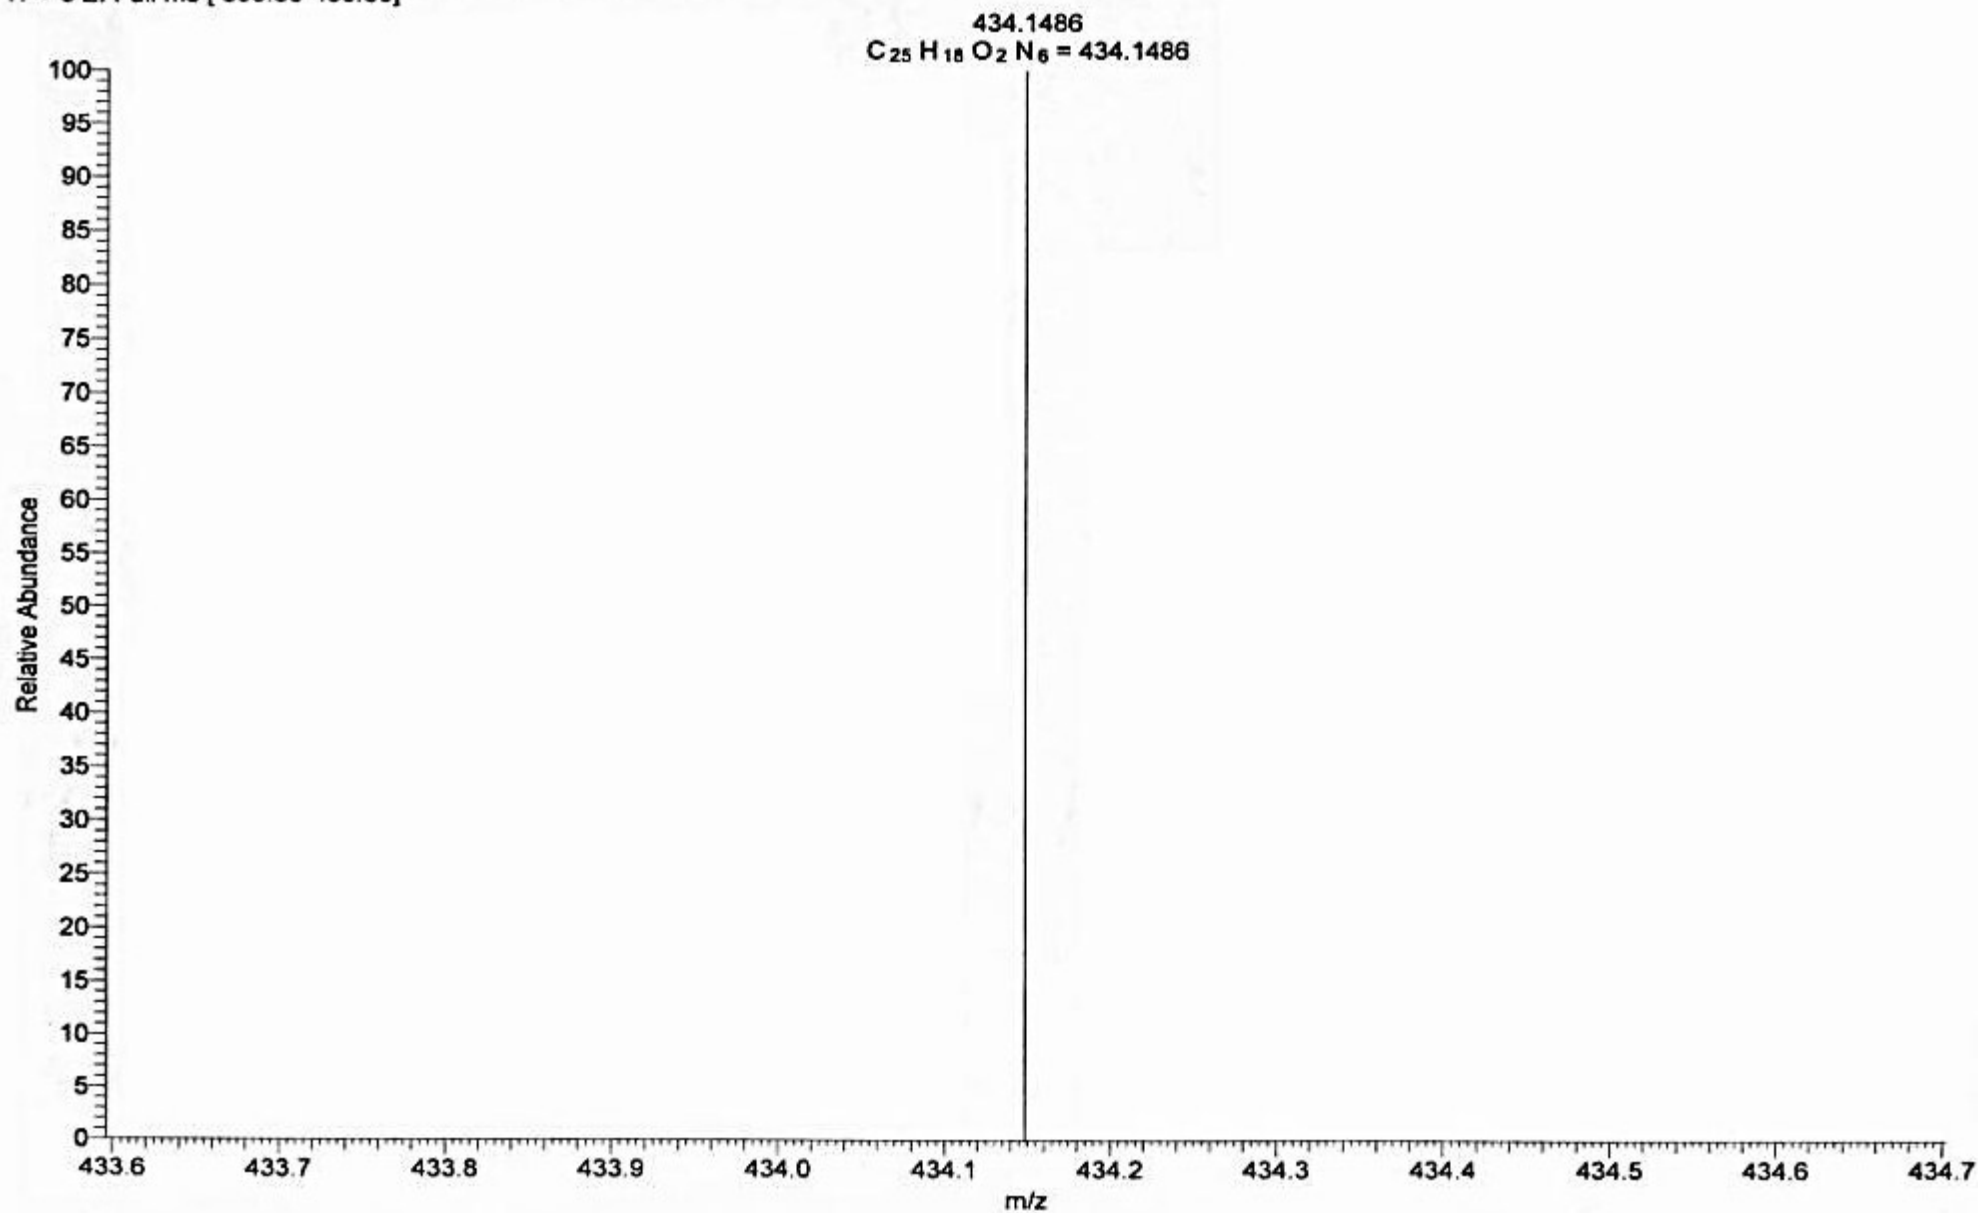

High resolution mass spectra for compound 9a

<sup>1</sup>H NMR spectra Dr.Saleh MS 5C1 in DMSO

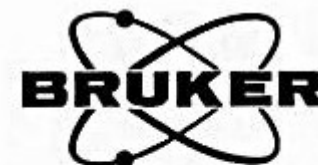

8.197  
8.182  
8.118  
7.685  
7.671  
7.648  
7.633  
7.598  
7.585  
7.572  
7.530  
7.517  
7.506  
7.000

4.453  
4.441  
4.429  
4.417

3.131

2.500

1.373  
1.362  
1.350

Current Data Parameters  
NAME Ms-5C1-1H  
EXPNO 2  
PROCNO 1

F2 - Acquisition Parameters  
Date 20160719  
Time 9.50  
INSTRUM spect  
PROBHD 5 mm PABBO BB-  
PULPROG zg30  
TD 65536  
SOLVENT DMSO  
NS 16  
DS 2  
SWH 12335.526 Hz  
FIDRES 0.188225 Hz  
AQ 2.6563926 sec  
RG 203  
DW 40.533 usec  
DE 20.00 usec  
TE 337.8 K  
D1 1.00000000 sec  
TDO 1

----- CHANNEL f1 -----  
SFO1 600.1337060 MHz  
NUC1 1H  
P1 10.60 usec  
PLW1 27.82500076 W

F2 - Processing parameters  
SI 32768  
SF 600.1300072 MHz  
WDW EM  
SSB 0  
LB 0.30 Hz  
GB 0  
PC 1.00

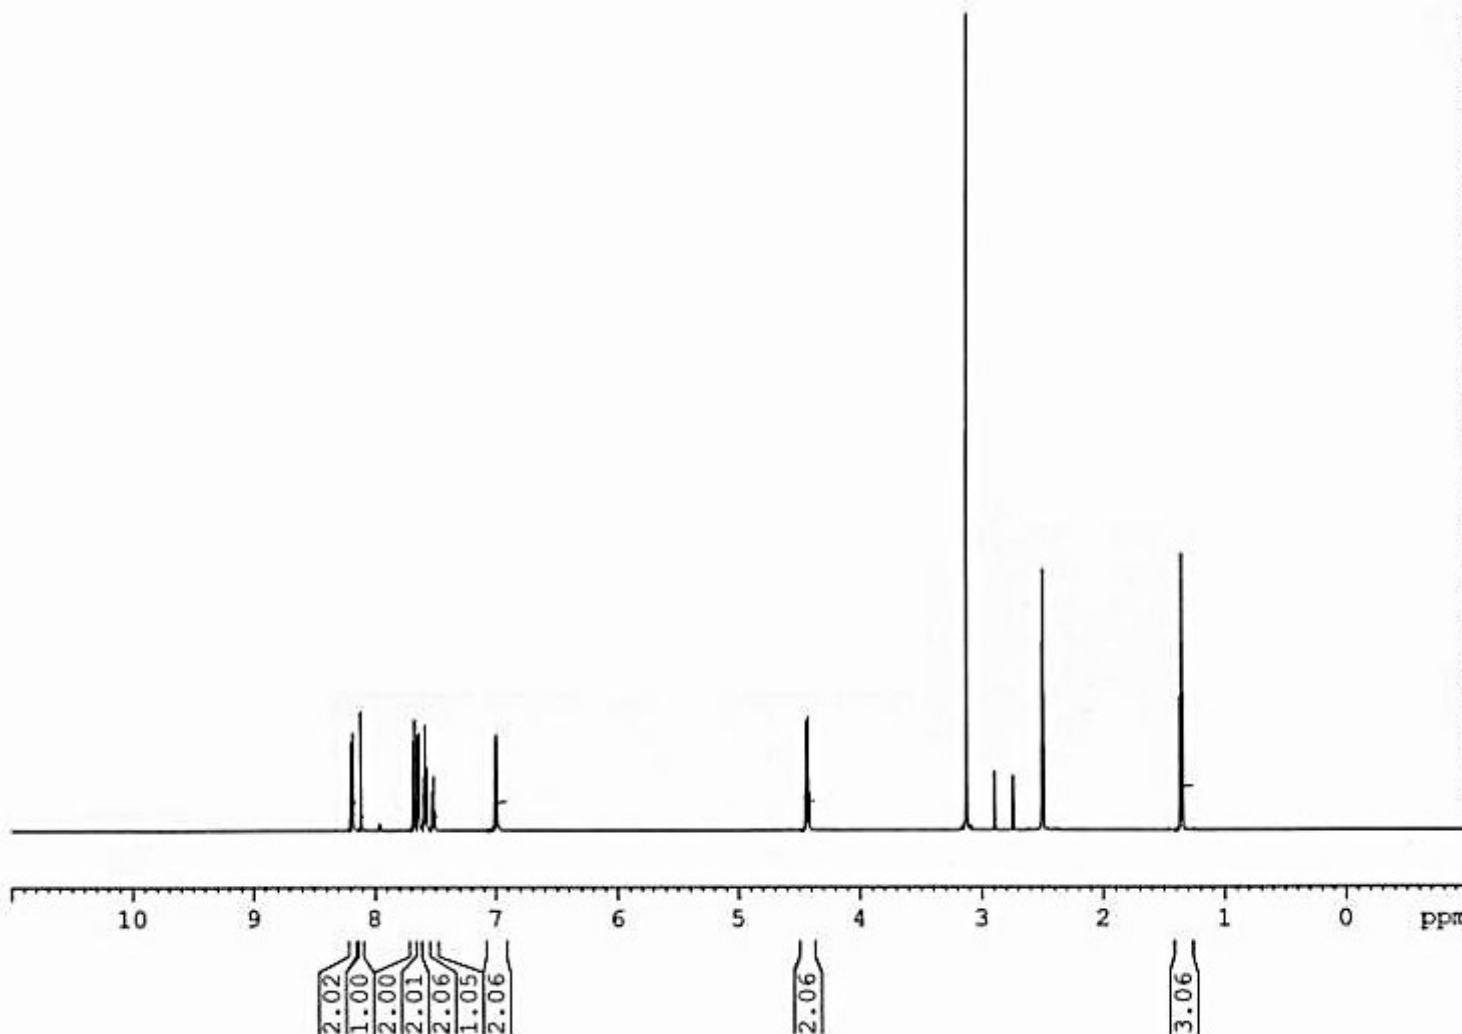

<sup>1</sup>H NMR for the compound **9b**

$^1\text{H}$  spectra Dr.Saleh MS 5Cl in DMSO

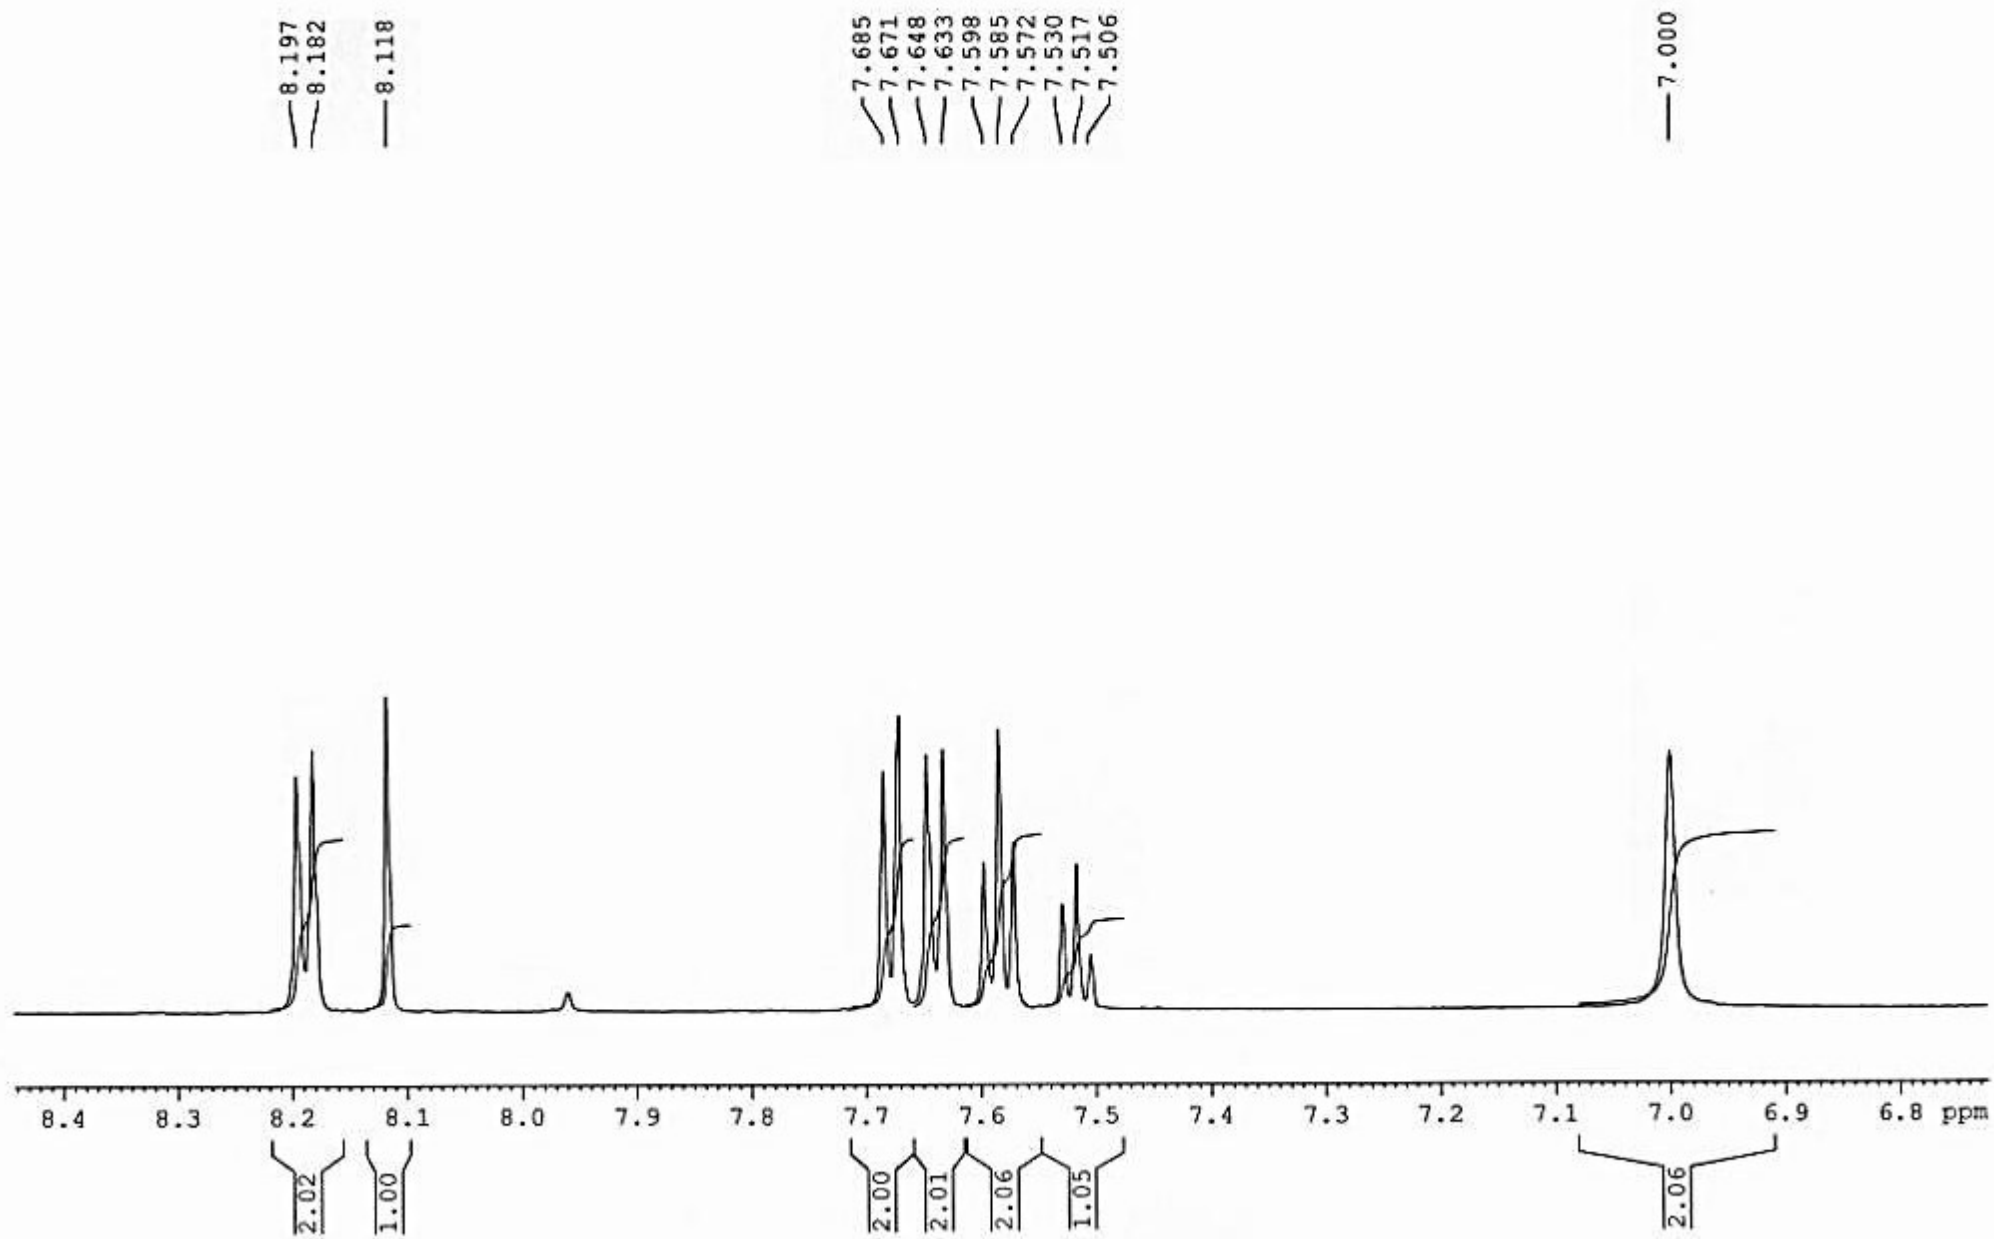

$^1\text{H}$  NMR for the compound **9b**



<sup>13</sup>C decoupled spectra Dr.Saleh MS 5Cl in DMSO( 30 hrs)

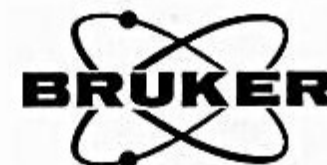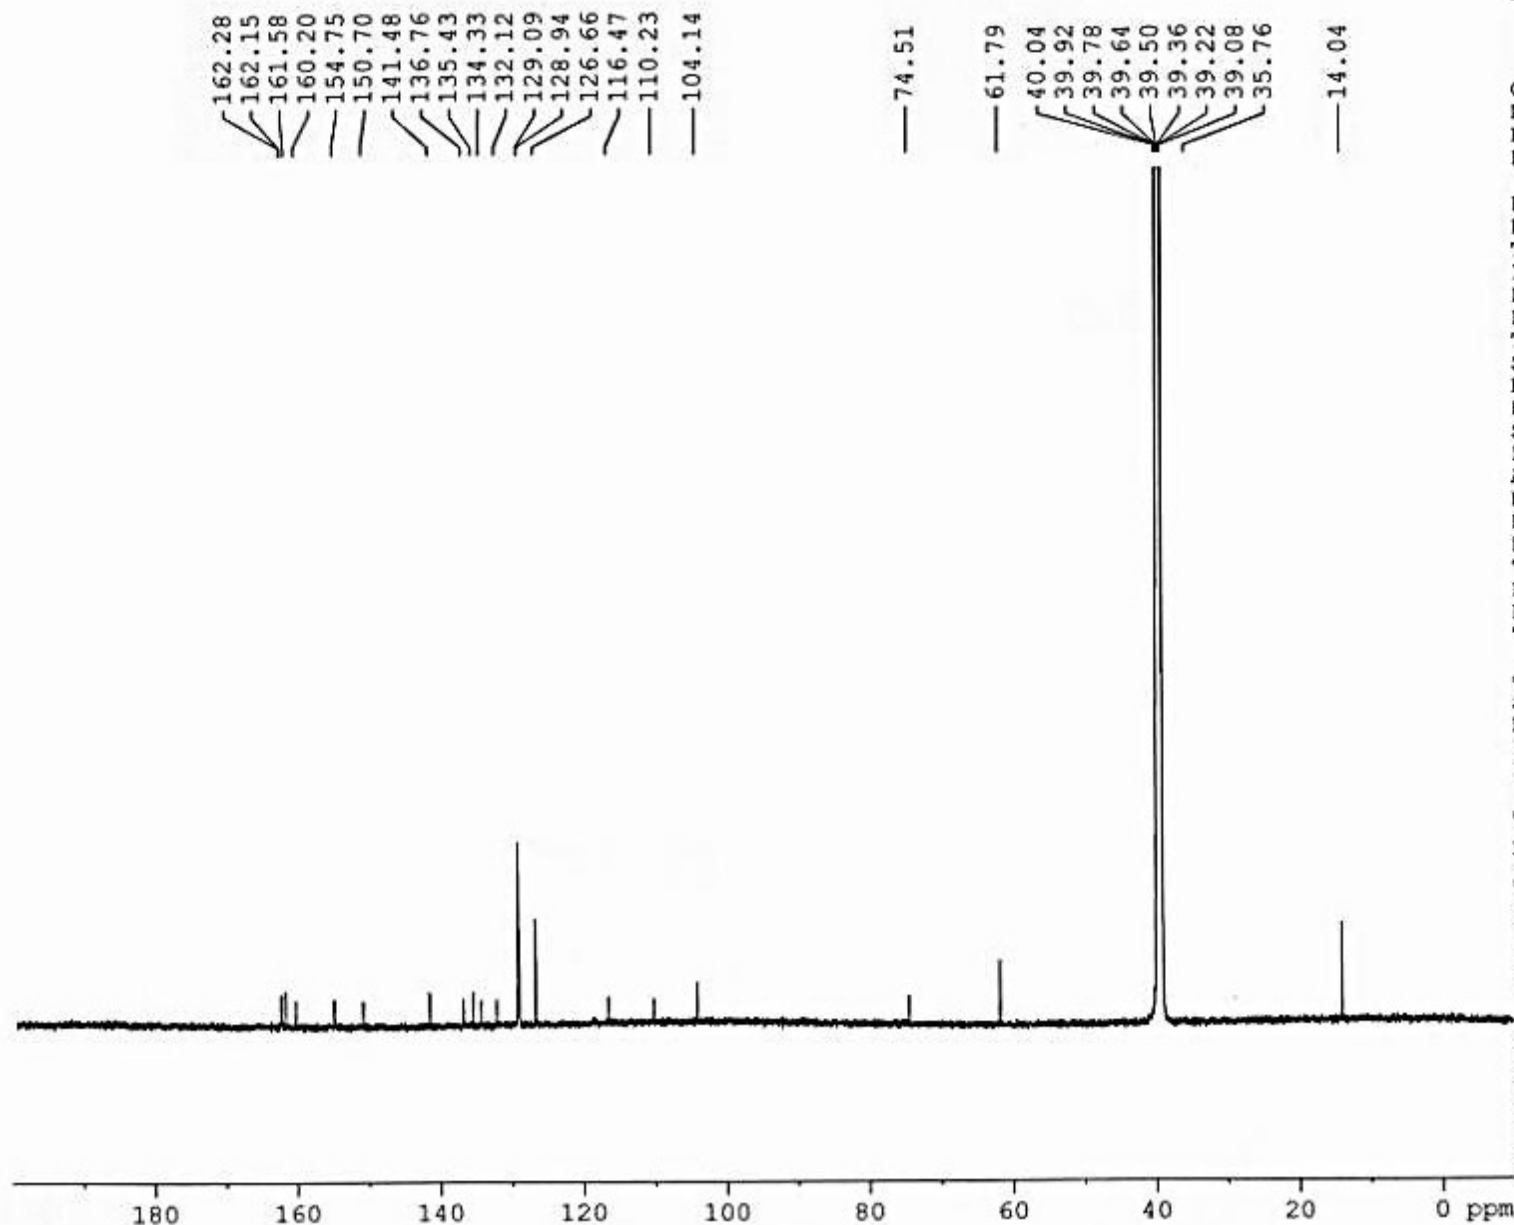

Current Data Parameters  
 NAME Ms-5Cl-13C  
 EXPNO 3  
 PROCNO 1

F2 - Acquisition Parameters  
 Date\_ 20160722  
 Time\_ 19.38  
 INSTRUM spect  
 PROBHD 5 mm PABBO BB-  
 PULPROG zgpg30  
 TD 65536  
 SOLVENT DMSO  
 NS 30720  
 DS 4  
 SWH 36057.691 Hz  
 FIDRES 0.550197 Hz  
 AQ 0.9087659 sec  
 RG 203  
 DW 13.867 usec  
 DE 50.00 usec  
 TE 298.0 K  
 D1 2.0000000 sec  
 D11 0.03000000 sec  
 TD0 1

----- CHANNEL f1 -----  
 SFO1 150.9178979 MHz  
 NUC1 13C  
 P1 8.80 usec  
 PLW1 78.13500214 W

----- CHANNEL f2 -----  
 SFO2 600.1324005 MHz  
 NUC2 1H  
 CPDPRG[2] waltz65  
 PCPD2 70.00 usec  
 PLW2 27.82500076 W  
 PLW12 0.63804001 W  
 PLW13 0.31264001 W

F2 - Processing parameters  
 SI 32768  
 SF 150.9028823 MHz  
 WDW EM  
 SSB 0  
 LB 2.00 Hz  
 GB 0  
 PC 1.40

<sup>13</sup>C NMR for the compound **9b**

$^{13}\text{C}$  decoupled spectra Dr.Saleh MS 5Cl in DMSO( 30 hrs)

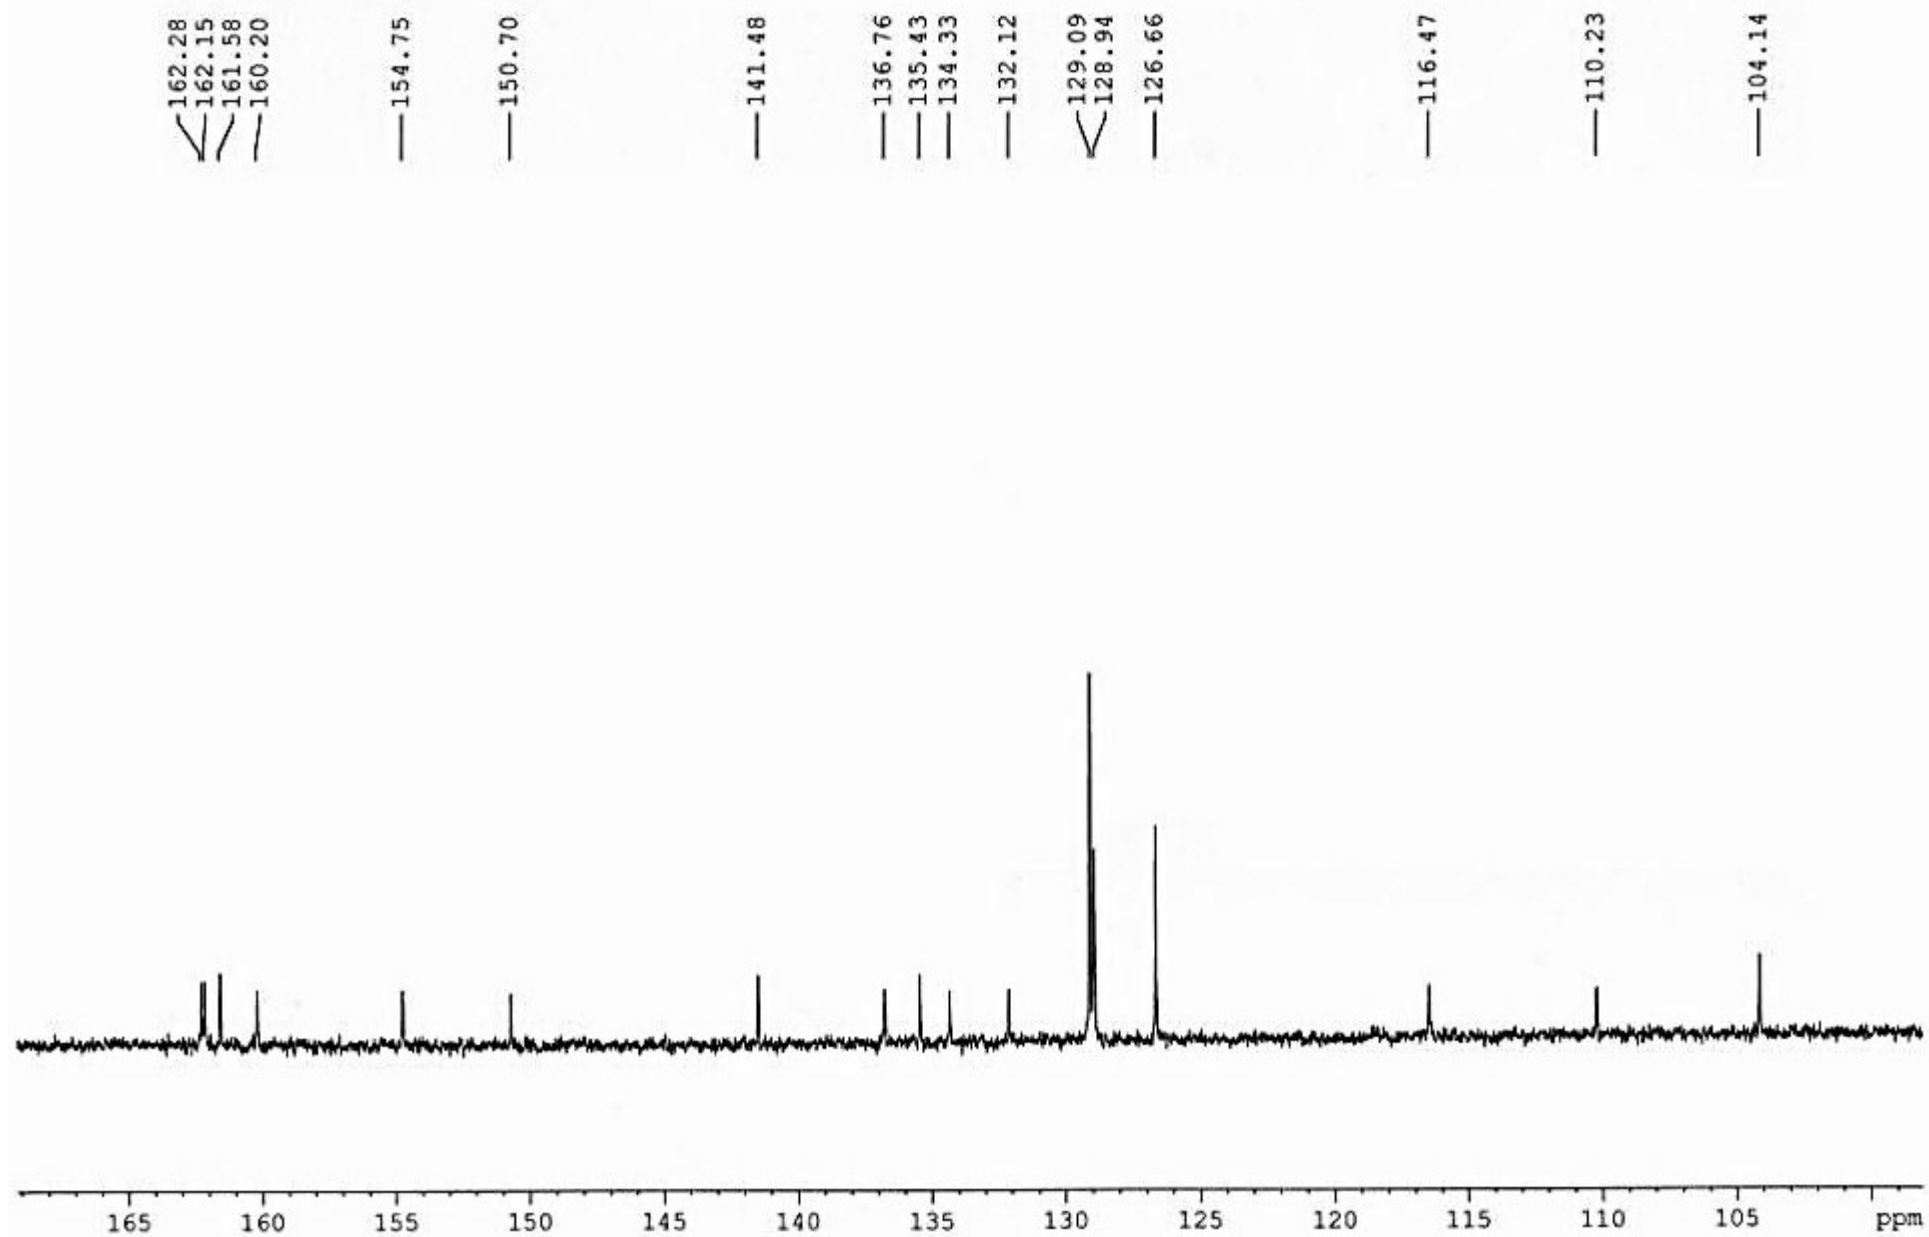

$^{13}\text{C}$  NMR for the compound **9b**

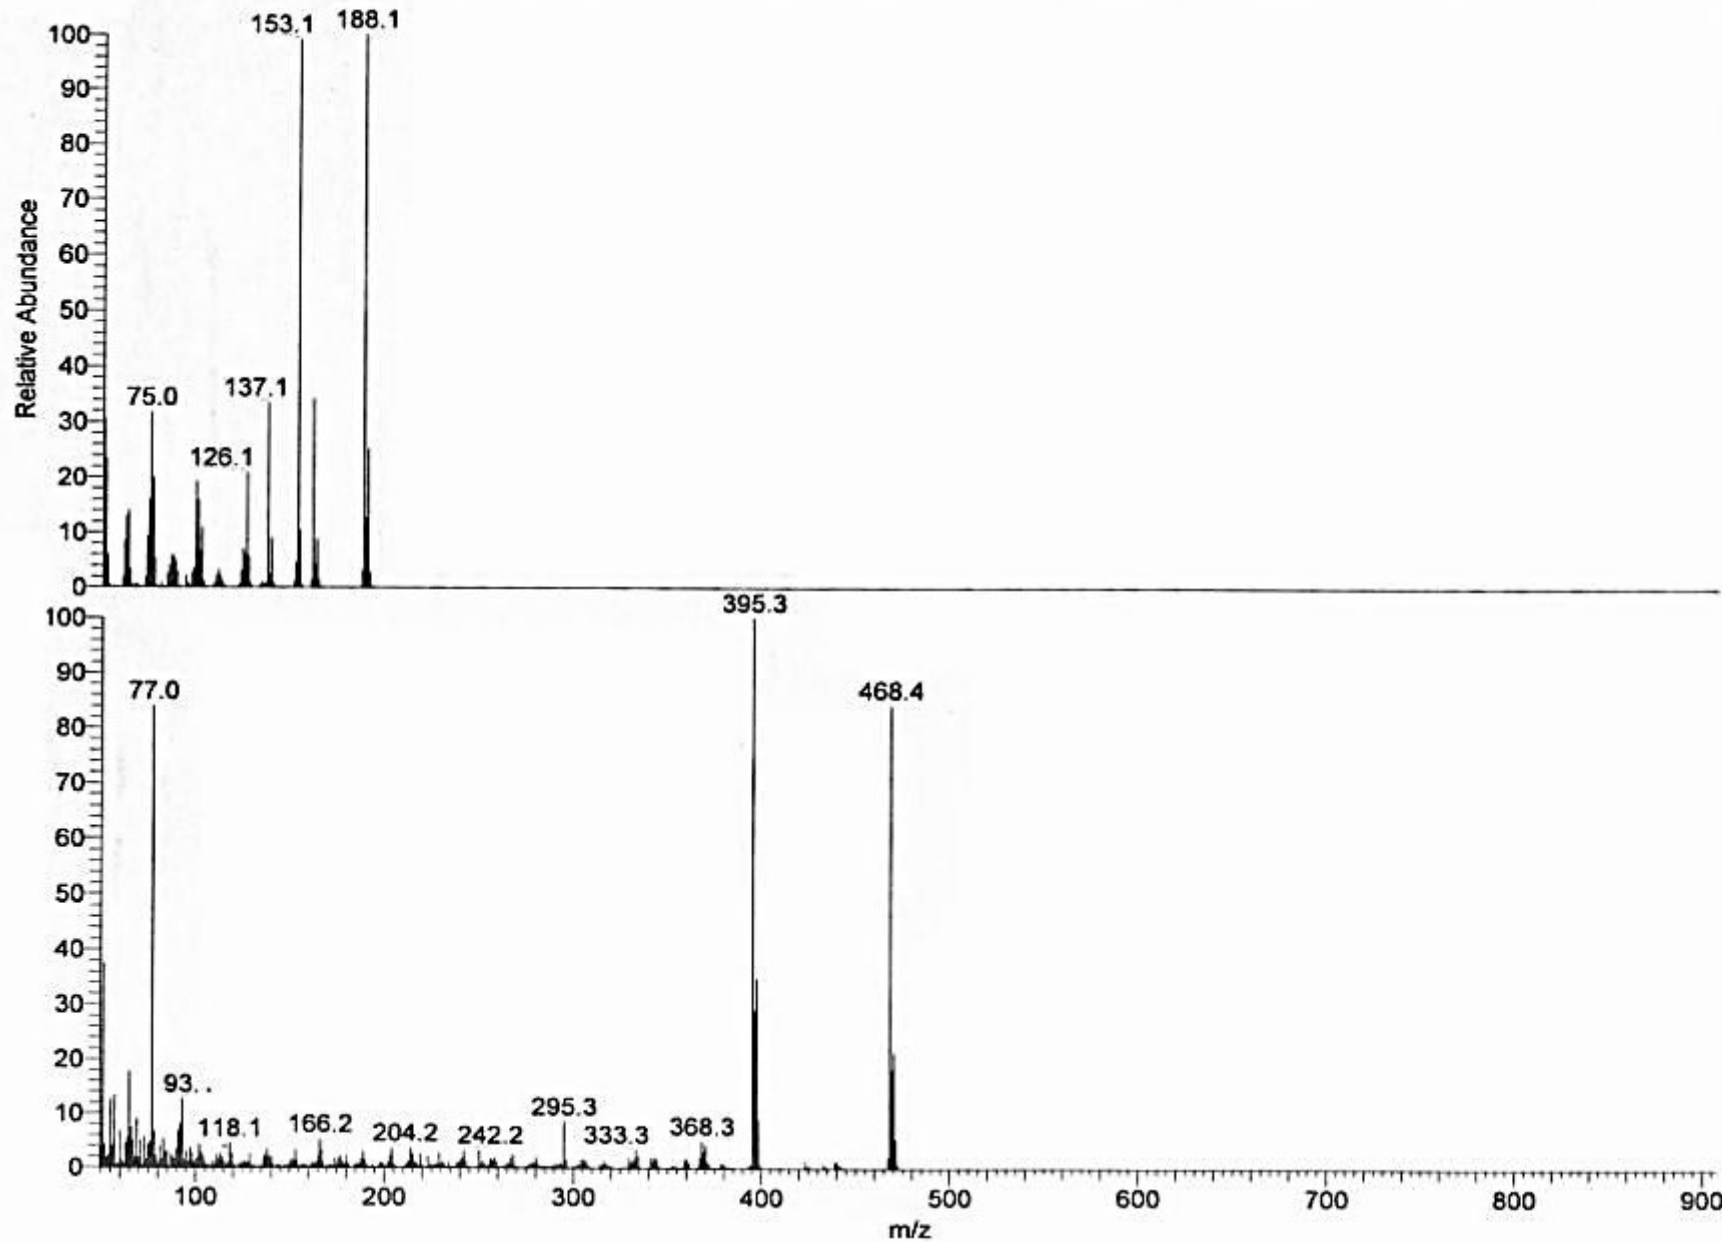

NL:  
3.17E6  
MS-4CL#69  
RT: 3.02 AV: 1  
T: + c EI Full ms  
[ 49.50-1000.50]

NL:  
2.90E6  
MS-4CL#178  
RT: 8.02 AV: 1  
T: + c EI Full ms  
[ 49.50-1000.50]

Mass spectra for the compound 9b

C:\Xcalibur\Data\saleh\HRMS-MS4cl-c1  
11/29/2015 2:20:43 PM

GC MS DFS- Thermo  
Project No: GS01/03

HRMS-MS4cl-c1 #2 RT: 6.87 AV: 1 NL: 1.40E3  
T: + c EI Full ms [ 399.50-500.50]

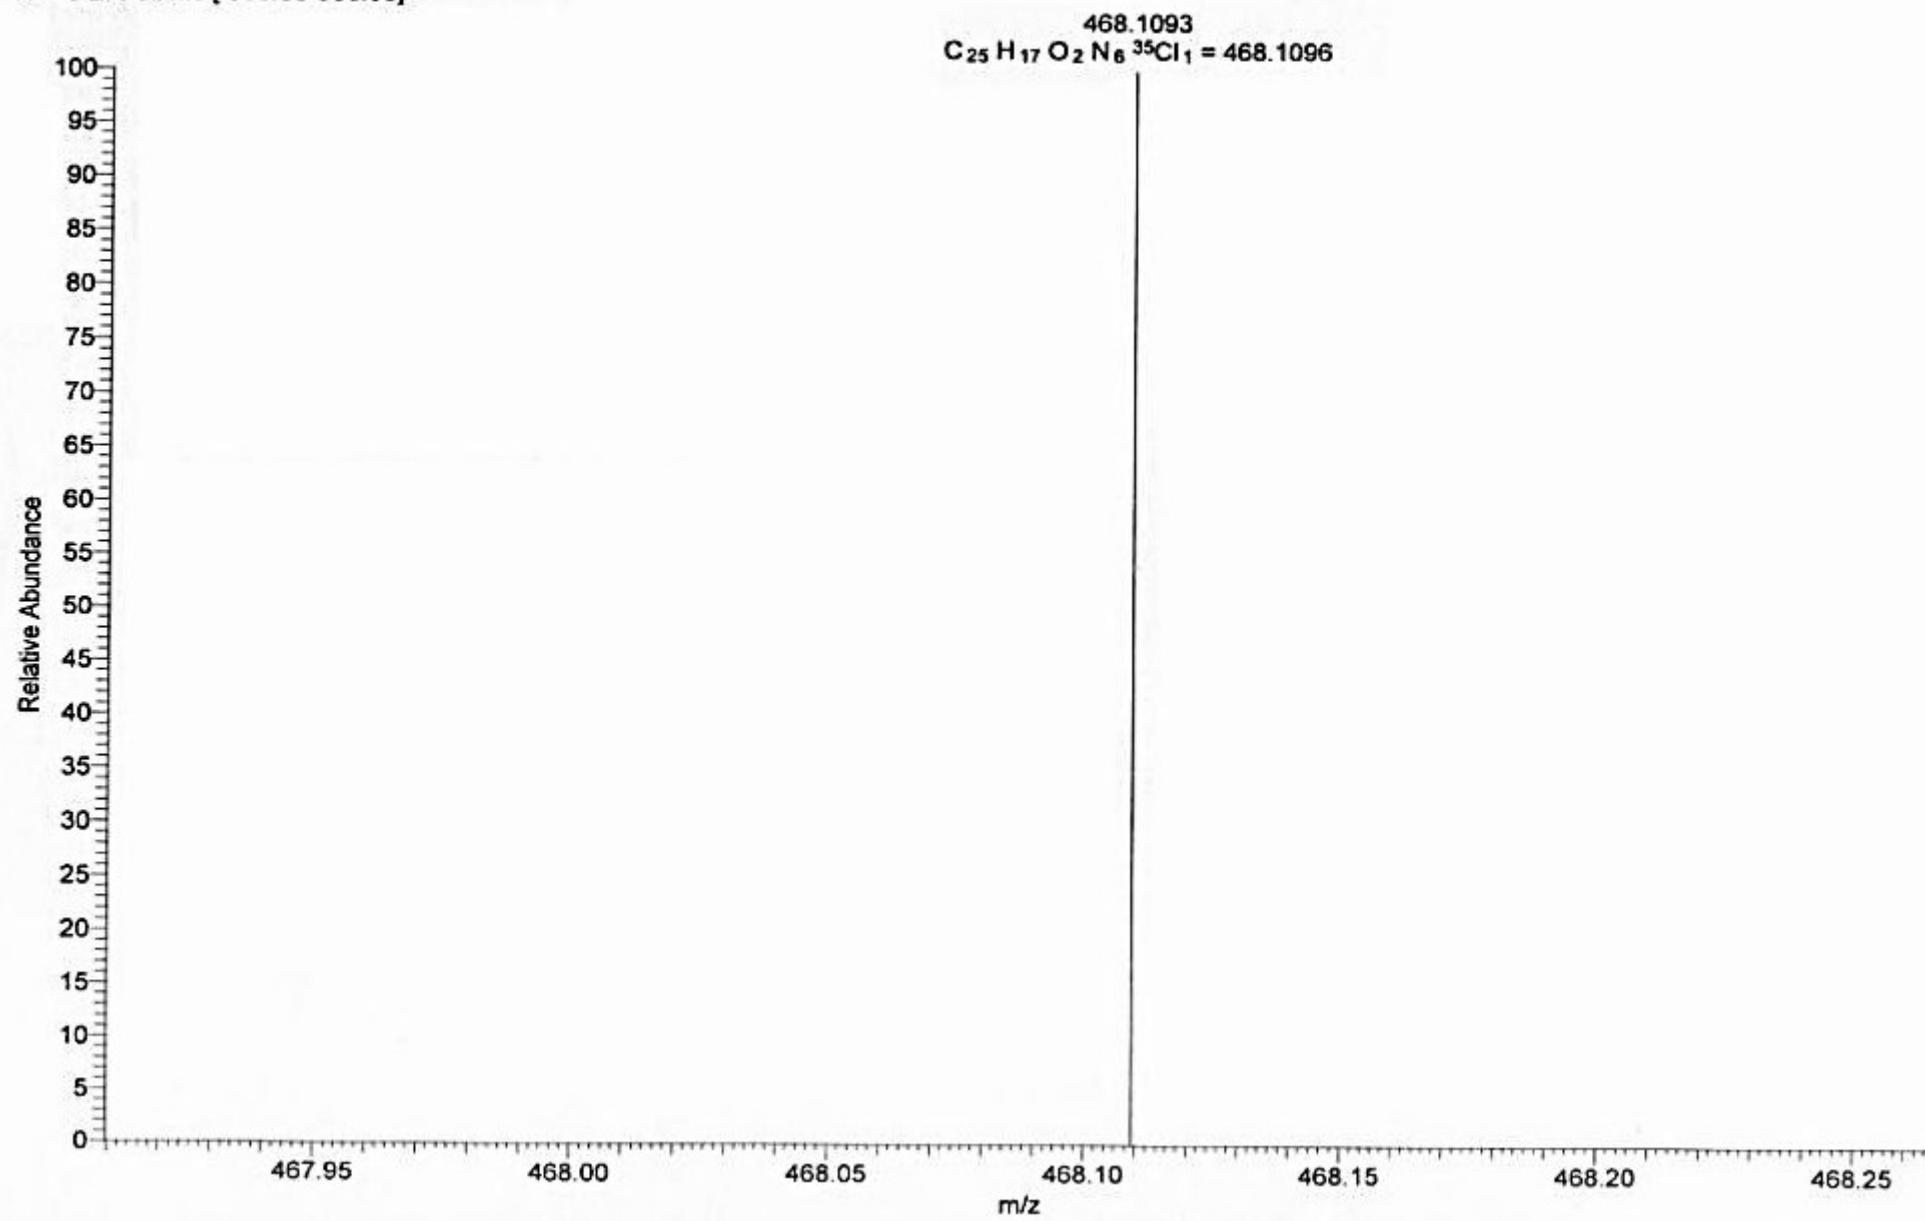

High resolution mass spectra for compound **9b**

<sup>1</sup>H spectrum Moustafa MS 2CL in DMSO

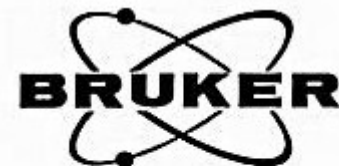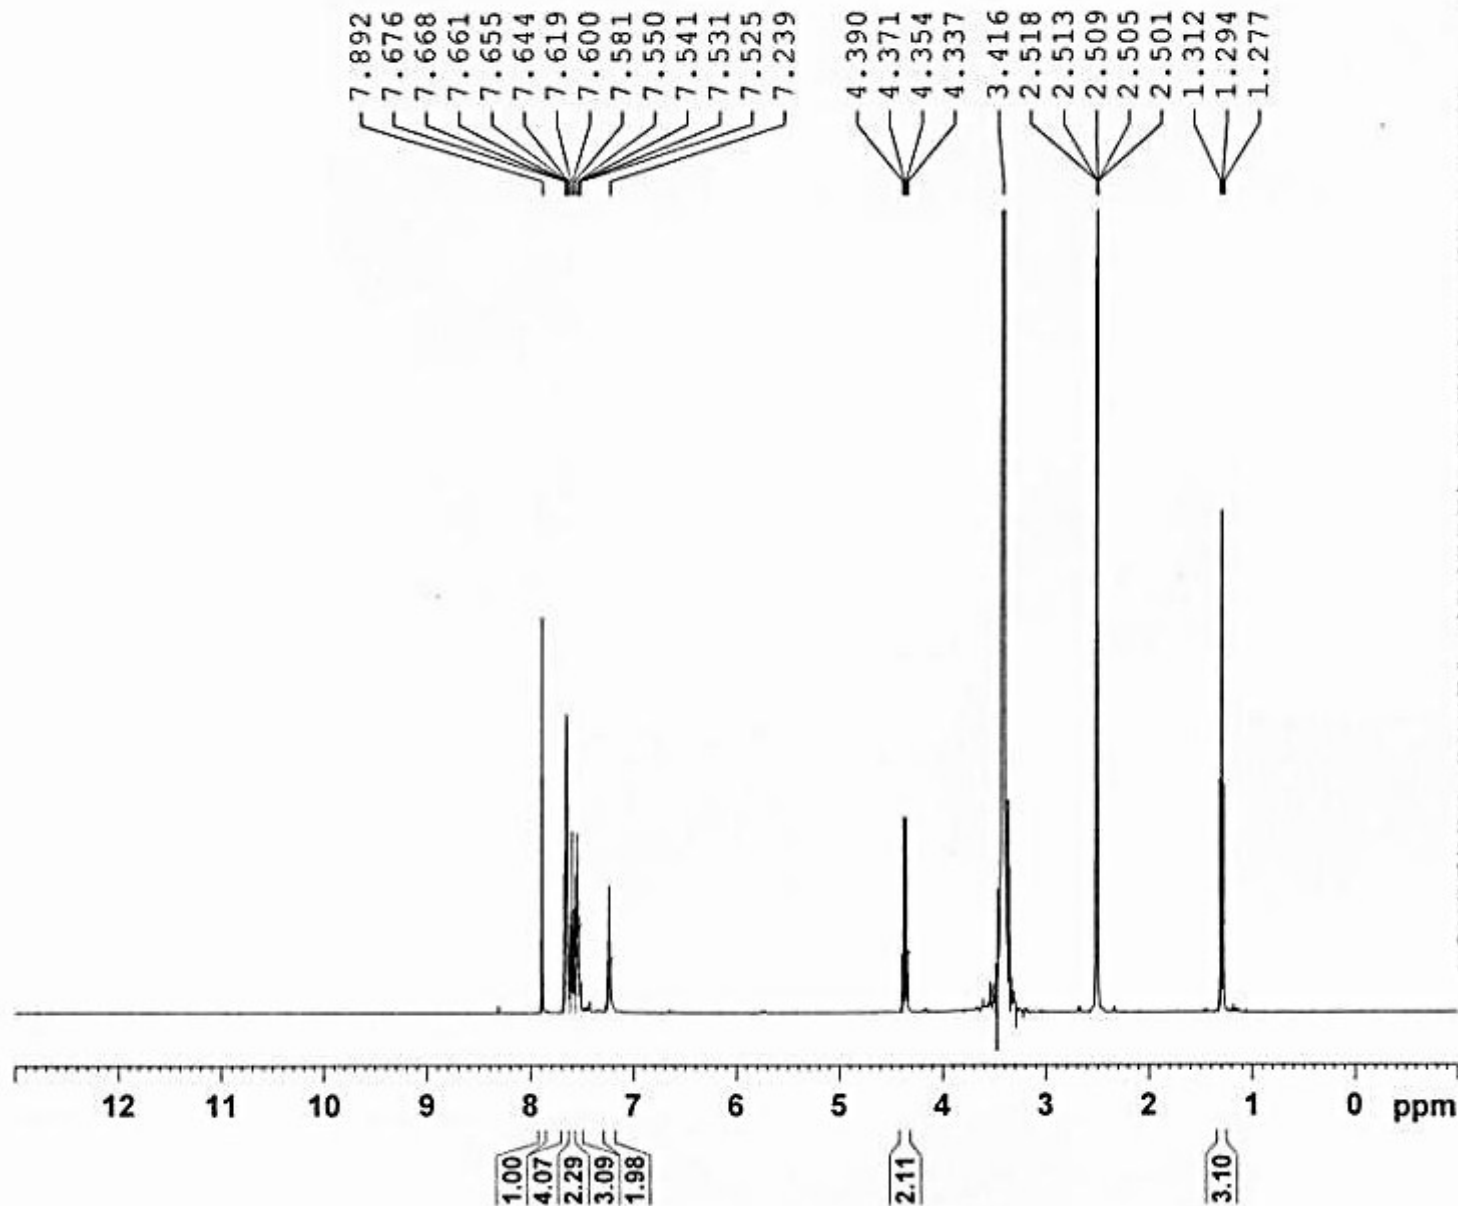

Current Data Parameters  
NAME MS2CL-1H  
EXPNO 1  
PROCNO 1

F2 - Acquisition Parameters  
Date\_ 20151203  
Time\_ 12.39  
INSTRUM spect  
PROBHD 5 mm QNP 1H/13  
PULPROG zg30  
TD 65536  
SOLVENT DMSO  
NS 16  
DS 2  
SWH 8278.146 Hz  
FIDRES 0.126314 Hz  
AQ 3.9584243 sec  
RG 161.3  
DW 60.400 usec  
DE 6.00 usec  
TE 294.8 K  
D1 1.00000000 sec  
TD0 1

==== CHANNEL f1 =====  
NUC1 1H  
P1 10.40 usec  
PL1 -2.00 dB  
SFO1 400.1324710 MHz

F2 - Processing parameters  
SI 32768  
SF 400.1300000 MHz  
WDW EM  
SSB 0  
LB 0.30 Hz  
GB 0  
PC 1.00

<sup>1</sup>H NMR for the compound 9c

<sup>1</sup>H spectrum Moustafa MS 2CL in DMSO

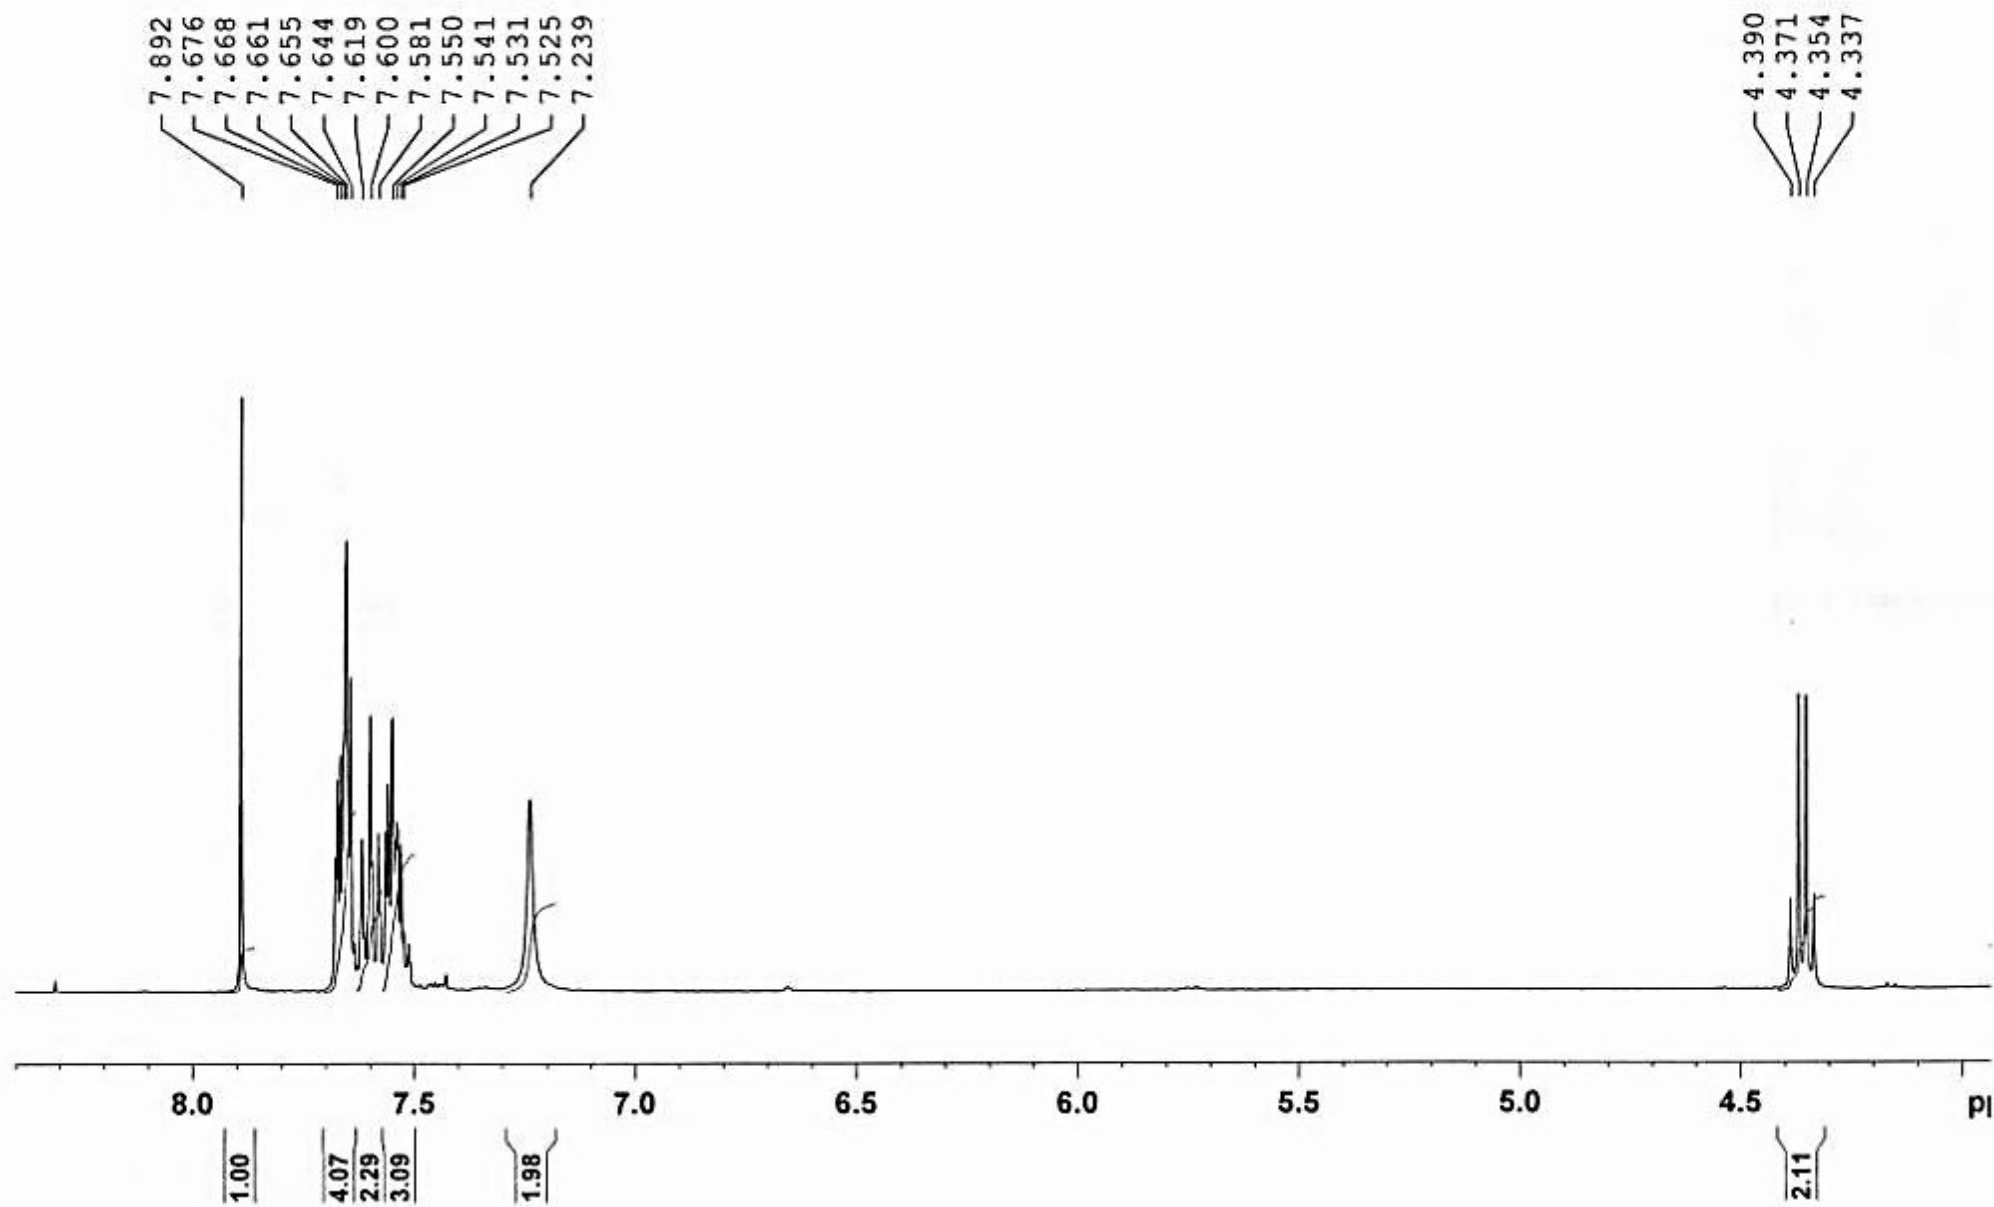

<sup>1</sup>H NMR for the compound 9c

coupled spectra Mostafa Ms2Cl in DMSO( time: 25 hrs)

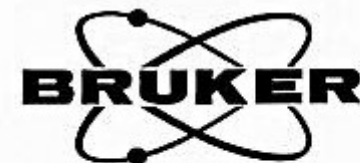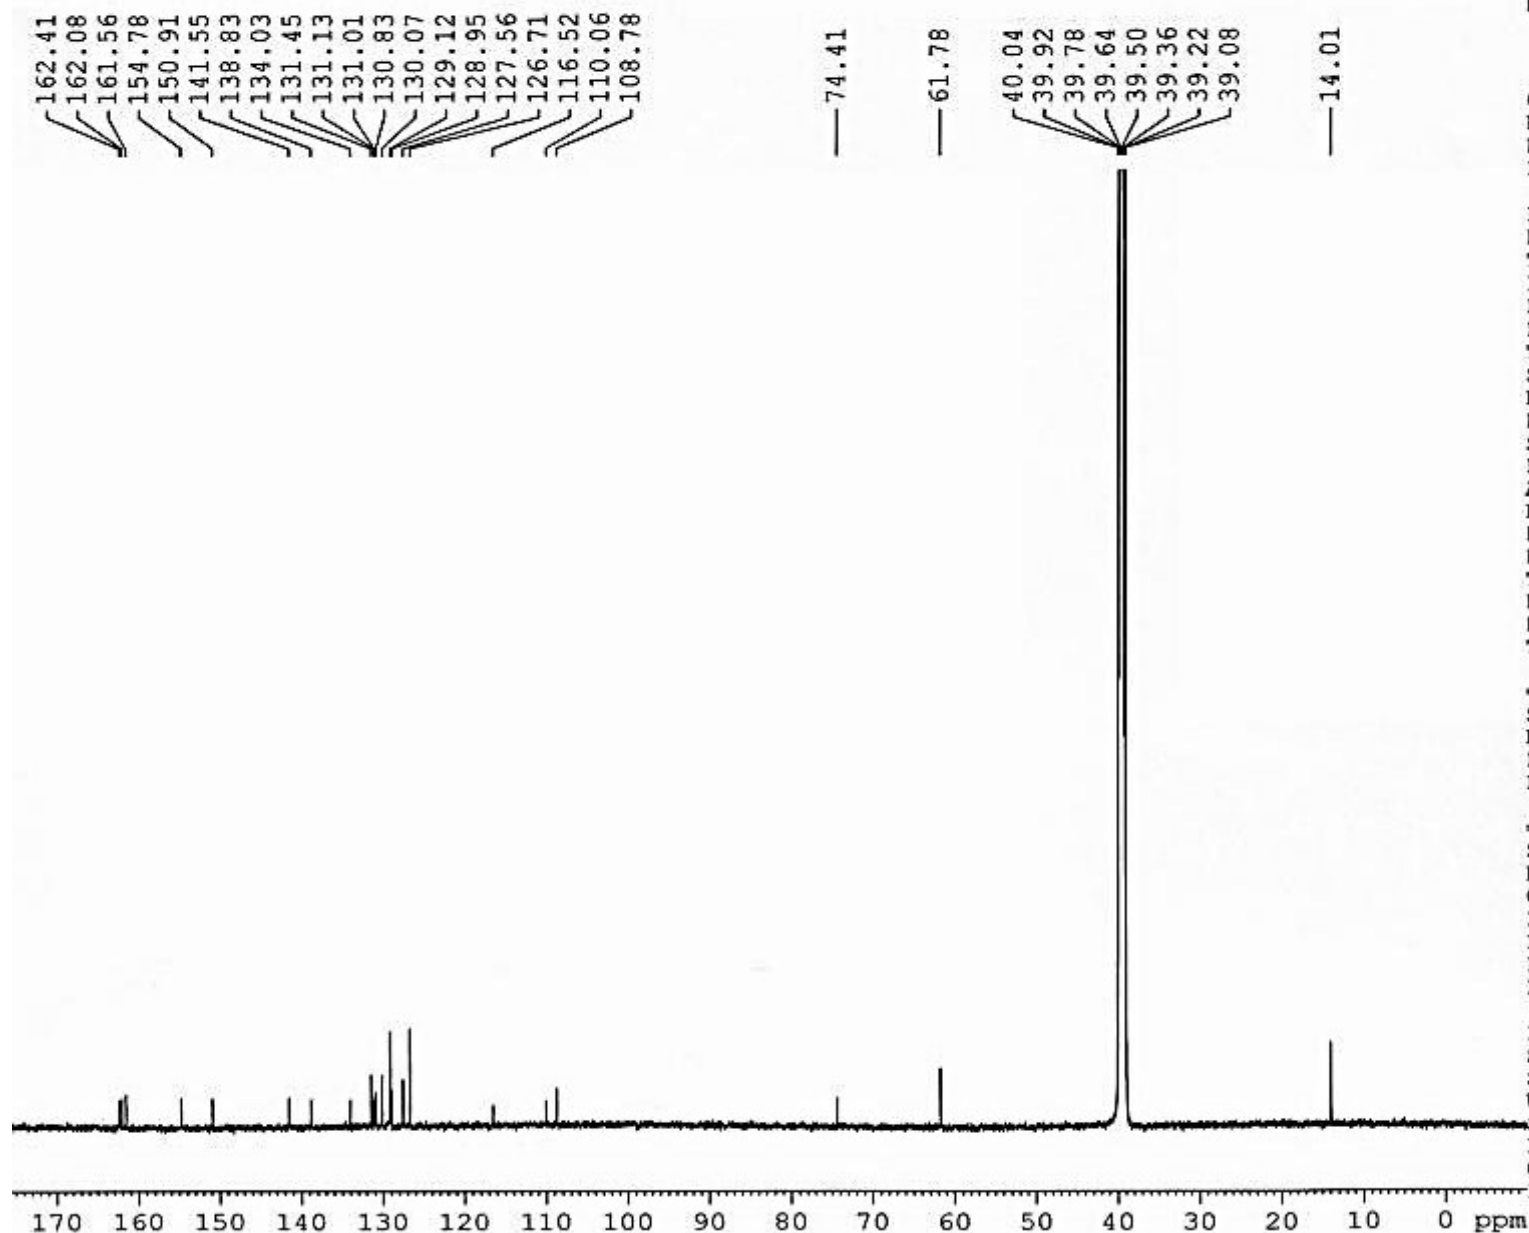

Current Data Parameters  
NAME MS2CL-13C  
EXPNO 1  
PROCNO 1

F2 - Acquisition Parameters  
Date\_ 20160706  
Time\_ 13.00  
INSTRUM spect  
PROBHD 5 mm FABBO BB-  
PULPROG zgpg30  
TD 65536  
SOLVENT DMSO  
NS 30720  
DS 4  
SWH 36057.691 Hz  
FIDRES 0.550197 Hz  
AQ 0.9087659 sec  
RG 203  
DW 13.867 usec  
DE 50.00 usec  
TE 298.0 K  
D1 2.00000000 sec  
D11 0.03000000 sec  
TD0 1

----- CHANNEL f1 -----  
SFO1 150.9178979 MHz  
NUC1 13C  
P1 8.80 usec  
PLW1 78.13500214 W

----- CHANNEL f2 -----  
SFO2 600.1324005 MHz  
NUC2 1H  
CPDPRG[2] waltz65  
PCPD2 70.00 usec  
PLW2 27.82500076 W  
PLW12 0.63804001 W  
PLW13 0.31264001 W

F2 - Processing parameters  
SI 32768  
SF 150.9028826 MHz  
WDW EM  
SSB 0  
LB 2.00 Hz  
GB 0  
PC 1.40

<sup>13</sup>C NMR for the compound 9c

<sup>13</sup>C decoupled spectra Mostafa Ms2C1 in DMSO( time: 25 hrs)

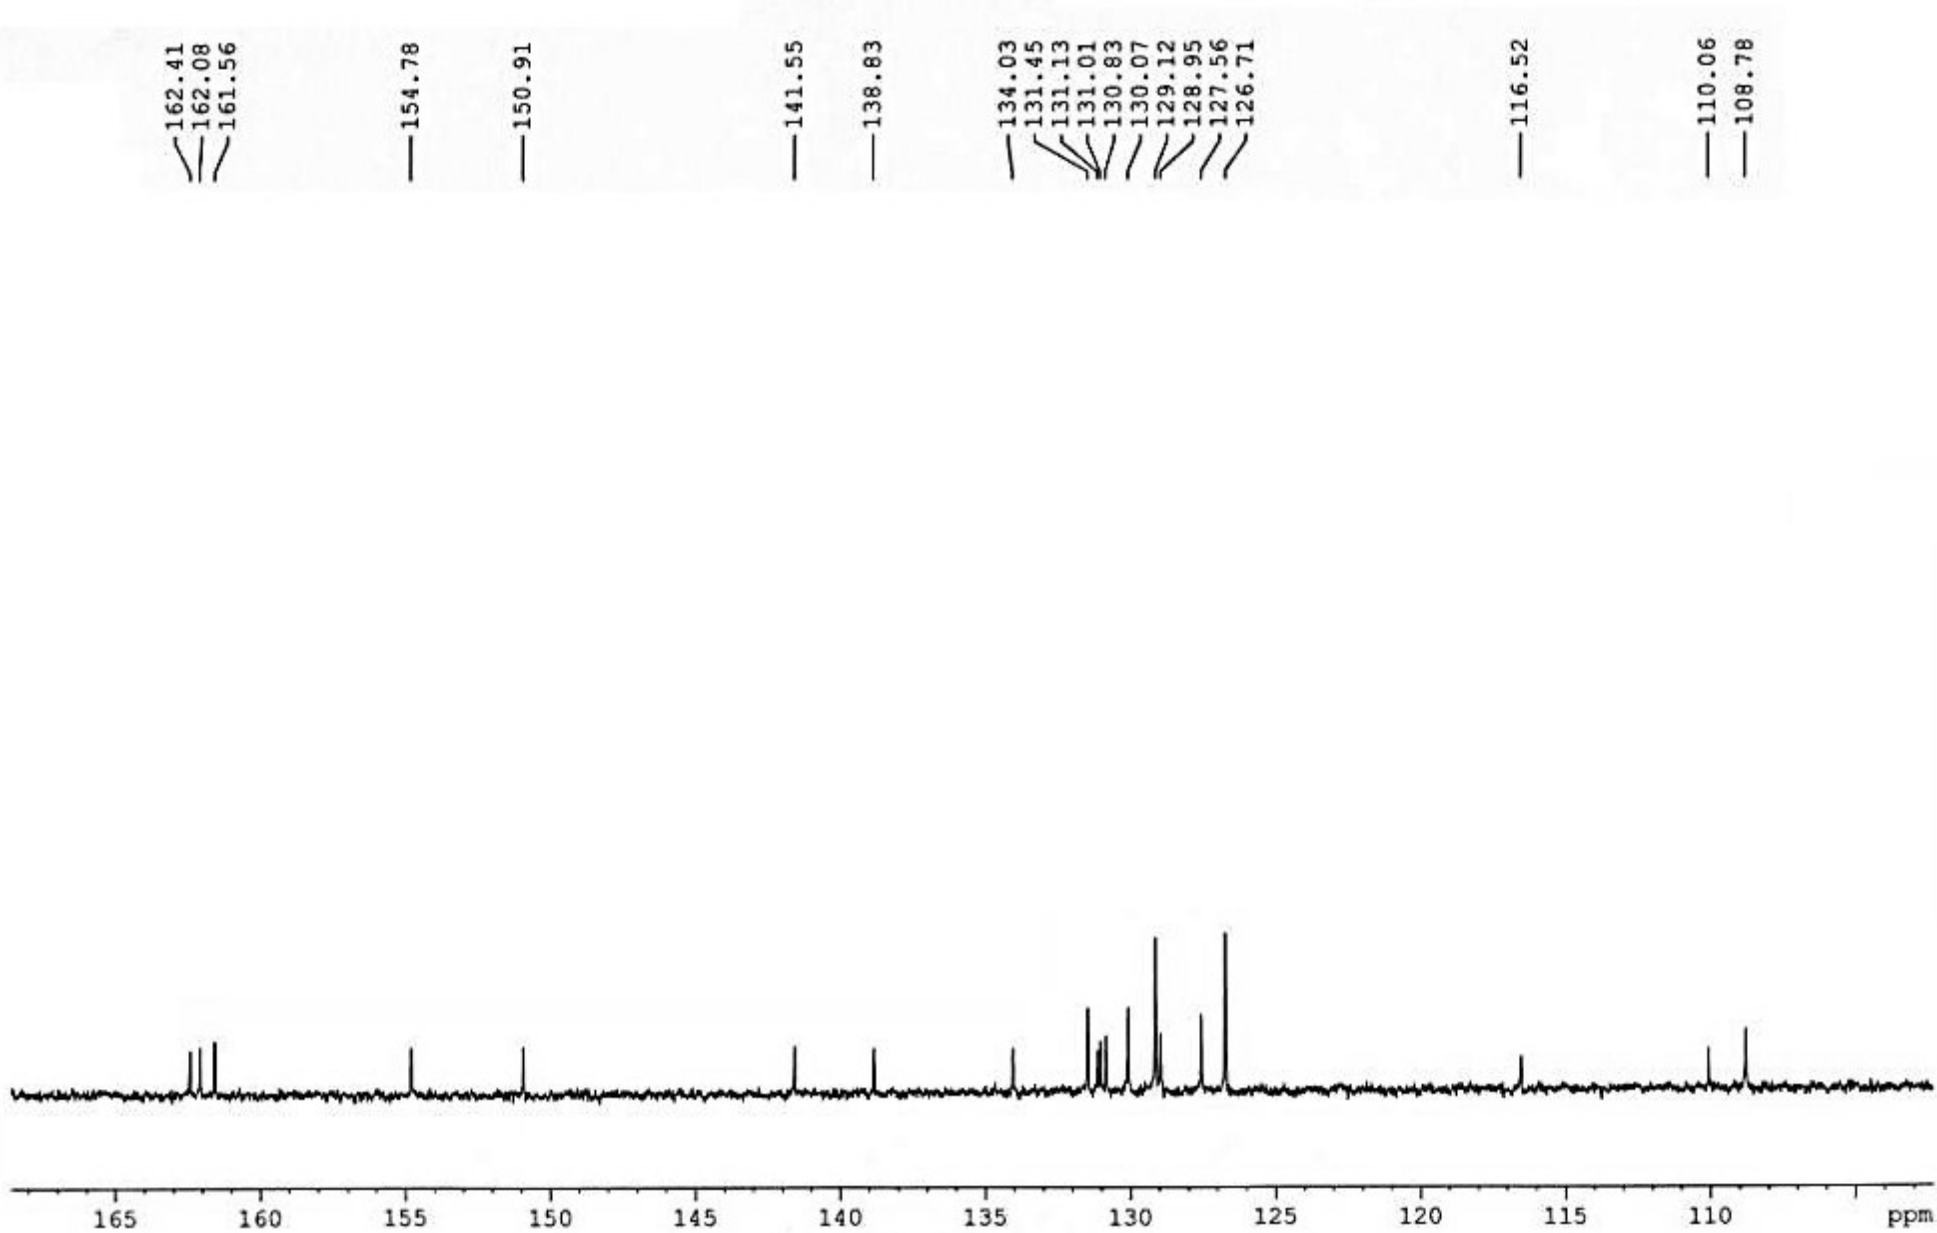

<sup>13</sup>C NMR for the compound **9c**



C:\Xcalibur\Data\saleh\MS-2CL  
11/4/2015 2:16:40 PM

GC MS DFS- Thermo  
Project No: GS01/03

MS-2CL

MS-2CL #219 RT: 8.40 AV: 1 NL: 3.91E6  
T: + c EI Full ms [ 49.50-1000.50]

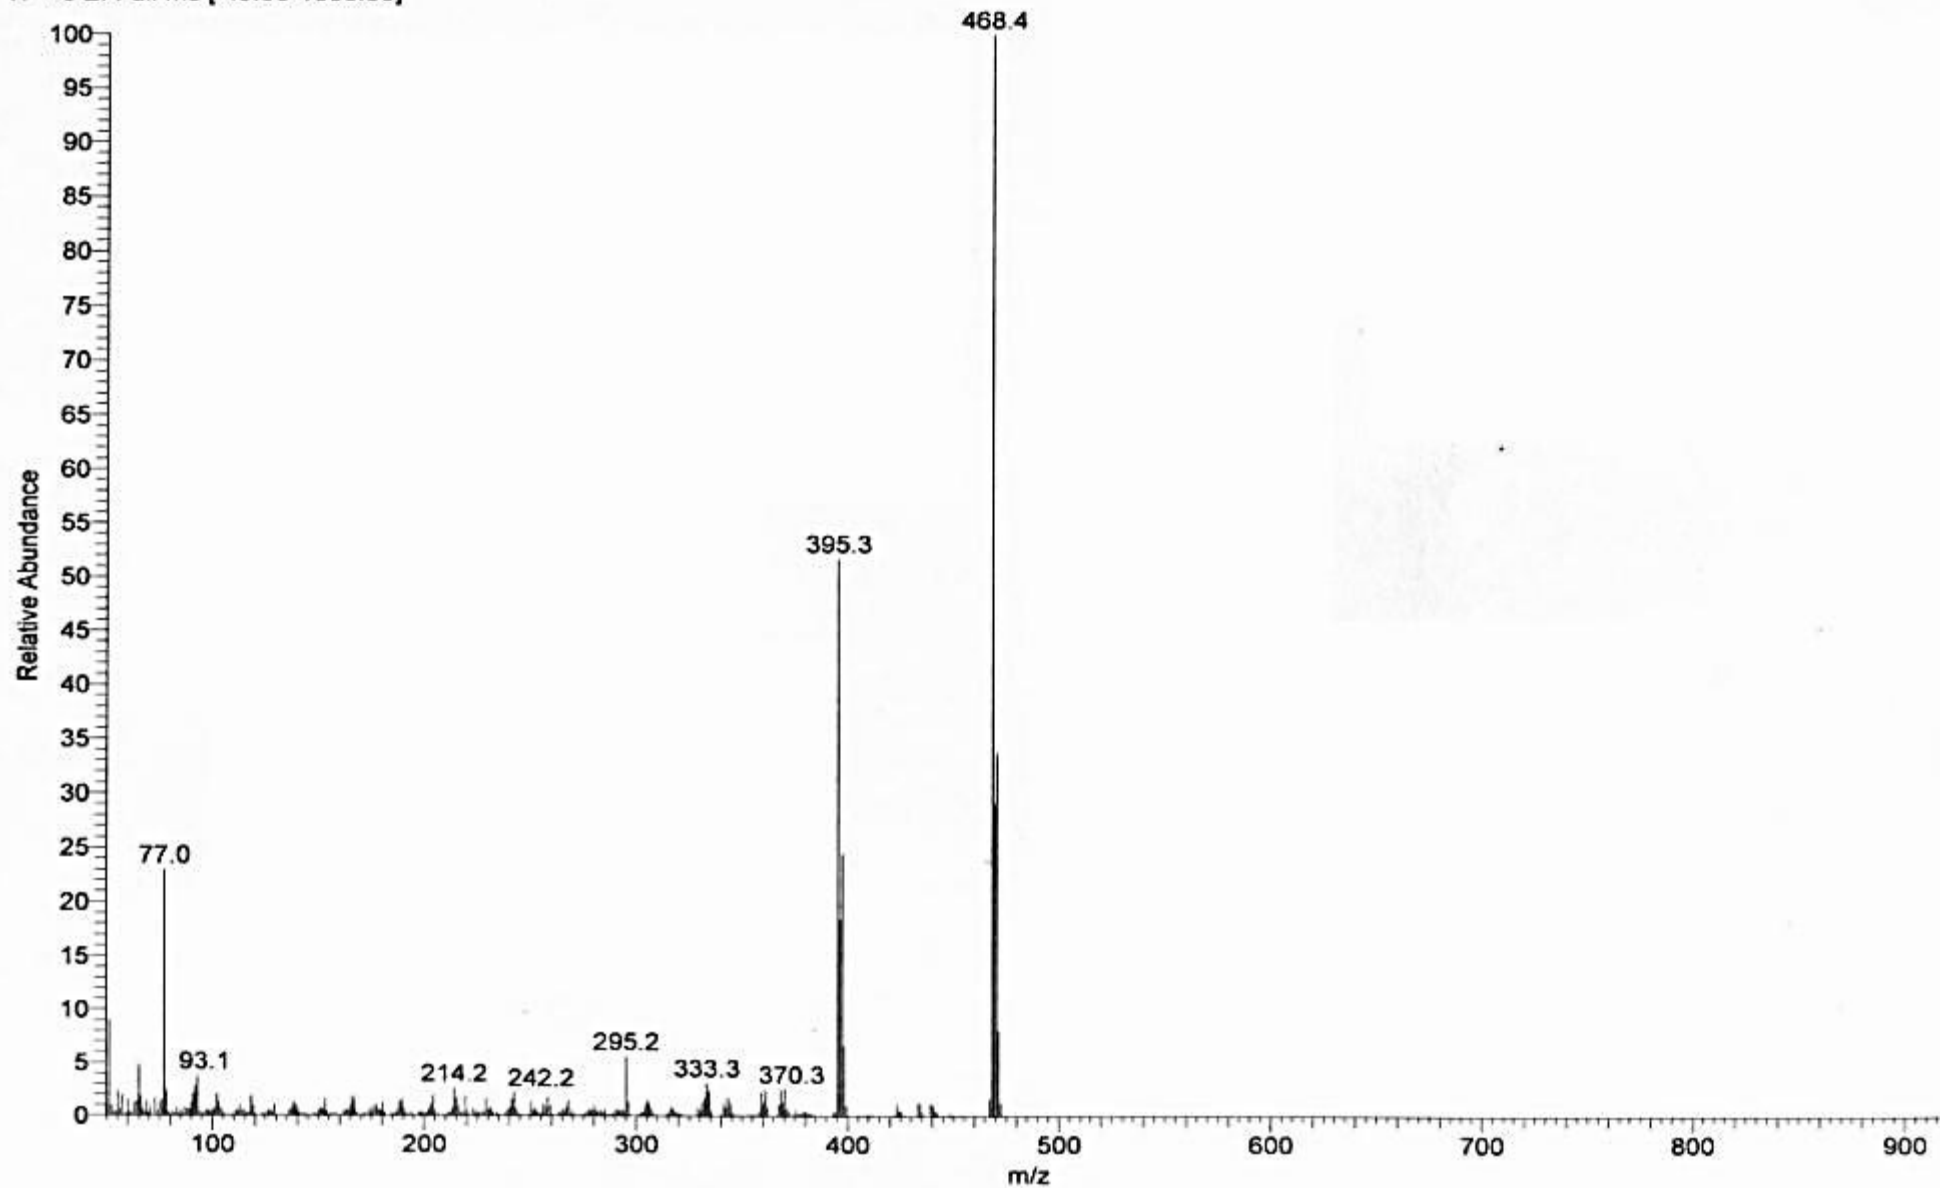

Mass spectra for the compound 9c

C:\Xcalibur\Data\saleh\HRMS-MS2Cl-c1  
11/29/2015 2:19:11 PM

GC MS DFS- Thermo  
Project No: GS01/03

HRMS-MS2Cl-c1 #55 RT: 8.98 AV: 1 NL: 2.90E4  
T: + c EI Full ms [ 439.50-500.50]

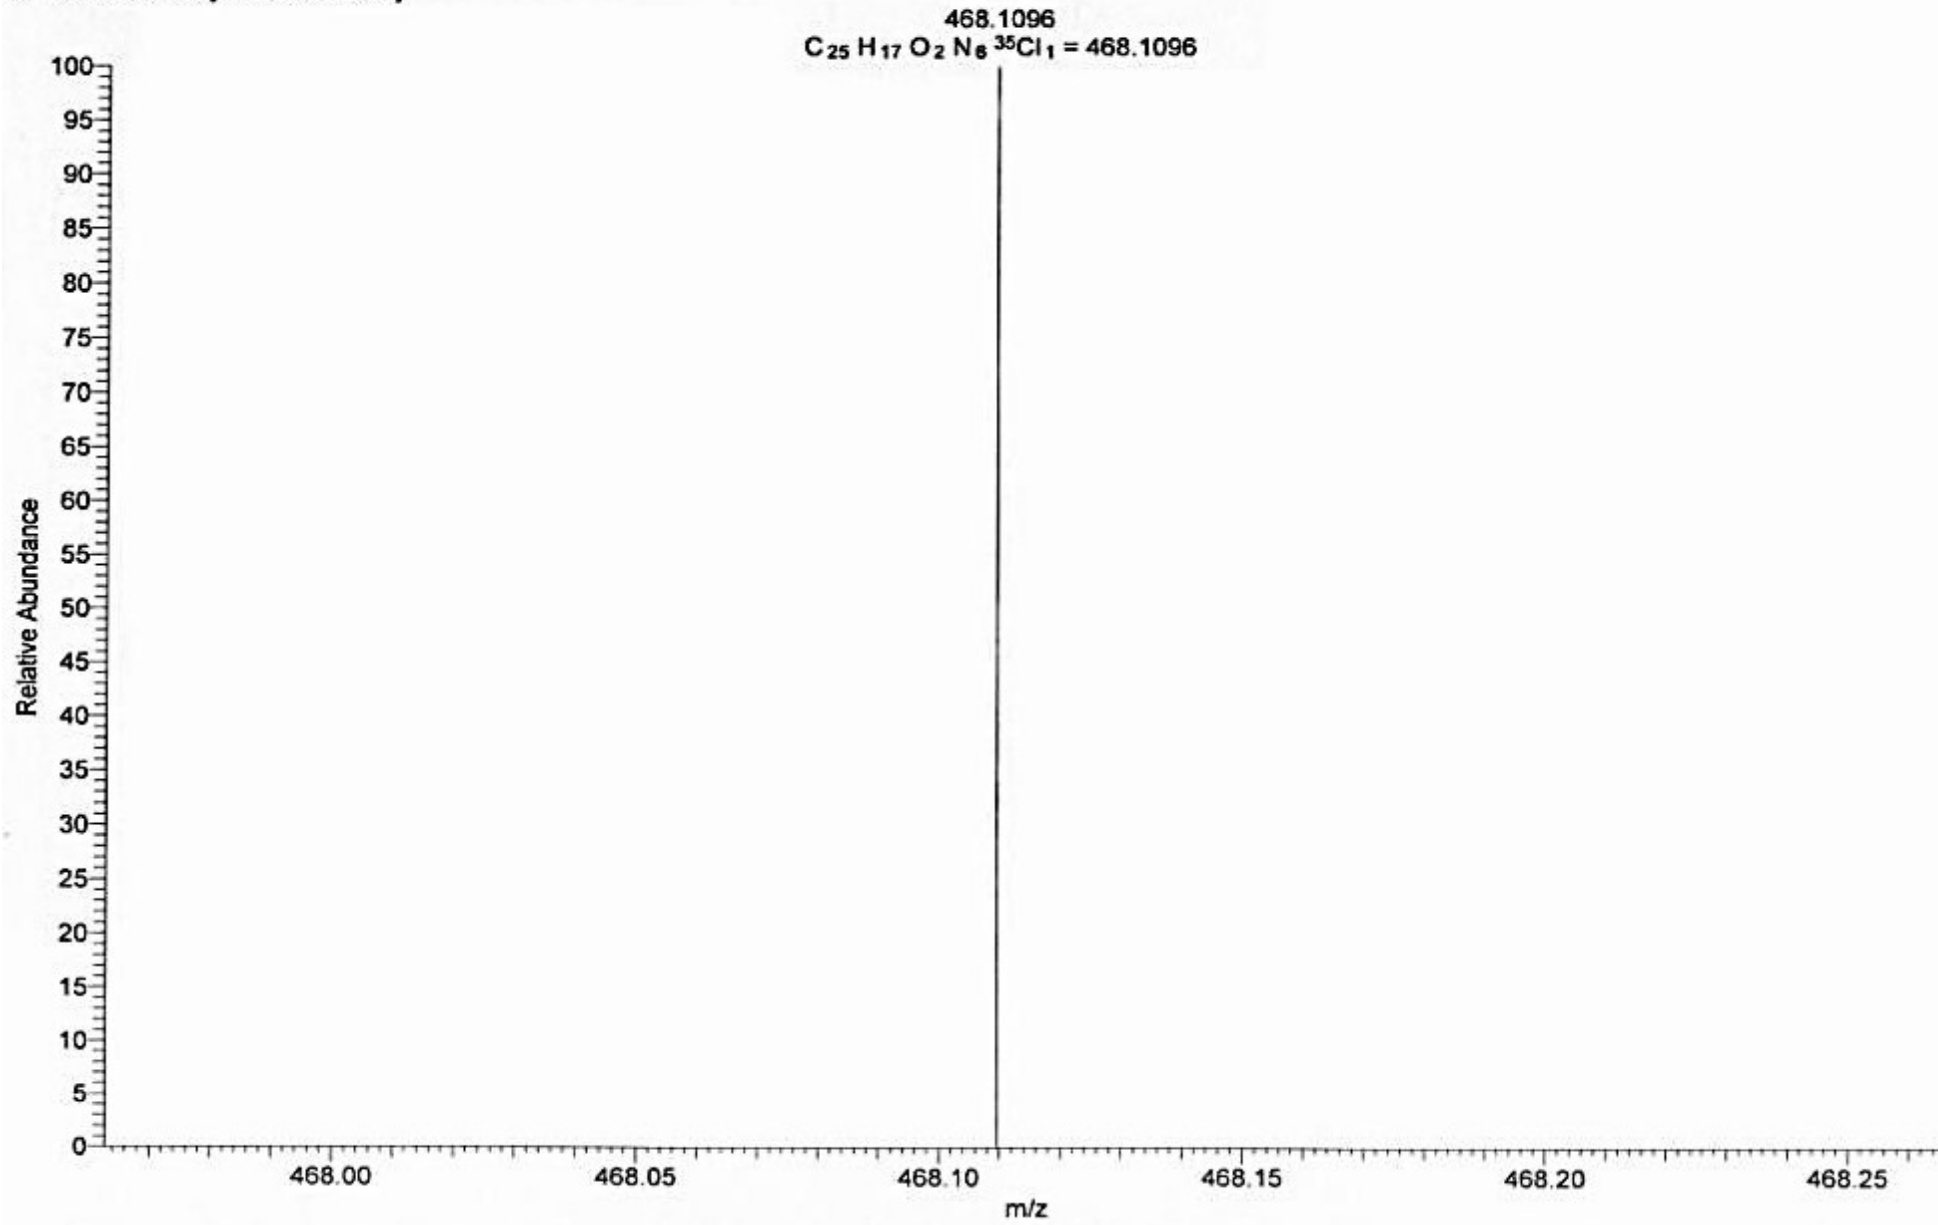

High resolution mass spectra for compound 9c

<sup>1</sup>H spectrum Moustafa MS4CH3 in DMSO

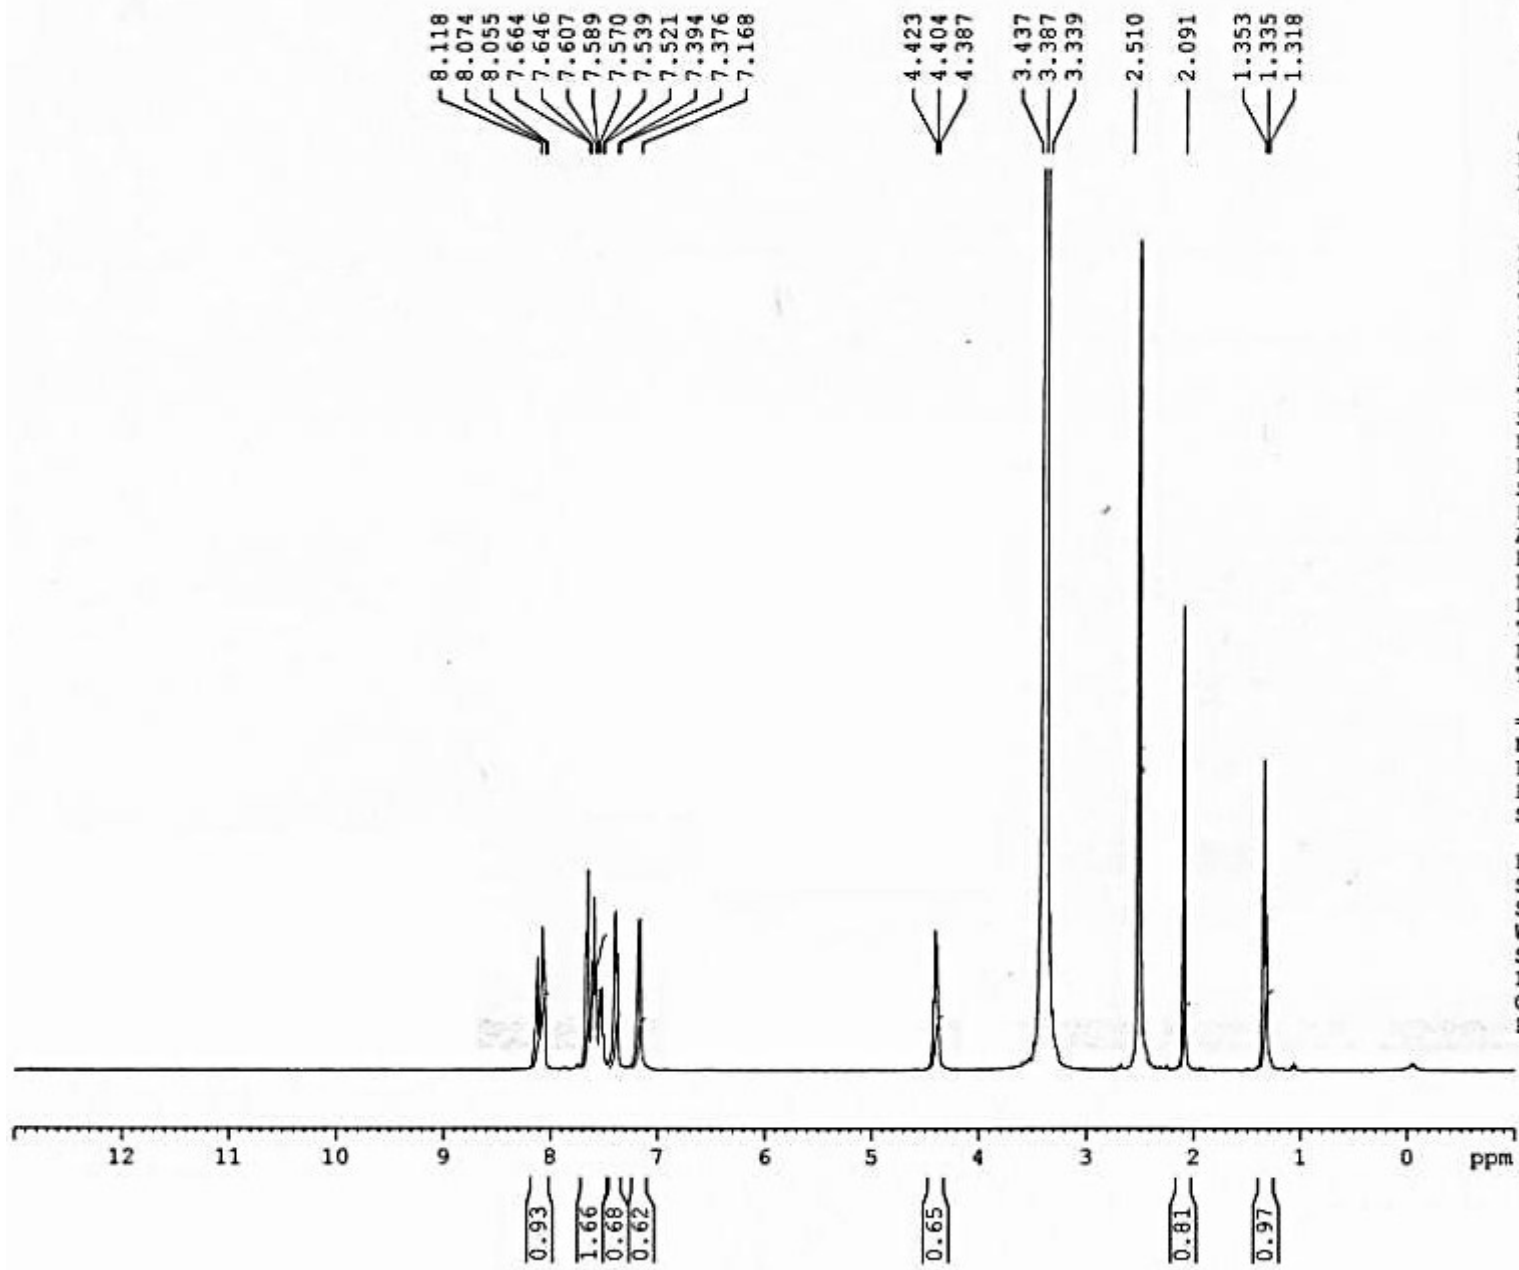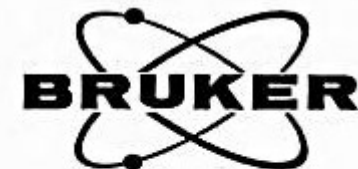

Current Data Parameters  
 NAME MS4CH3-1H  
 EXPNO 1  
 PROCNO 1

F2 - Acquisition Parameters  
 Date\_ 20151202  
 Time\_ 9.39  
 INSTRUM spect  
 PROBHD 5 mm QNP 1H/13  
 PULPROG zg30  
 TD 65536  
 SOLVENT DMSO  
 NS 16  
 DS 2  
 SWH 8278.146 Hz  
 FIDRES 0.126314 Hz  
 AQ 3.9584243 sec  
 RG 181  
 DW 60.400 usec  
 DE 6.00 usec  
 TE 295.4 K  
 D1 1.00000000 sec  
 TD0 1

===== CHANNEL f1 =====  
 NUC1 1H  
 P1 10.40 usec  
 PL1 -2.00 dB  
 SFO1 400.1324710 MHz

F2 - Processing parameters  
 SI 32768  
 SF 400.1300000 MHz  
 WDW EM  
 SSB 0  
 LB 0.30 Hz  
 GB 0  
 PC 1.00

<sup>1</sup>H NMR for the compound **9d**

<sup>1</sup>H spectrum Moustafa MS4CH3 in DMSO

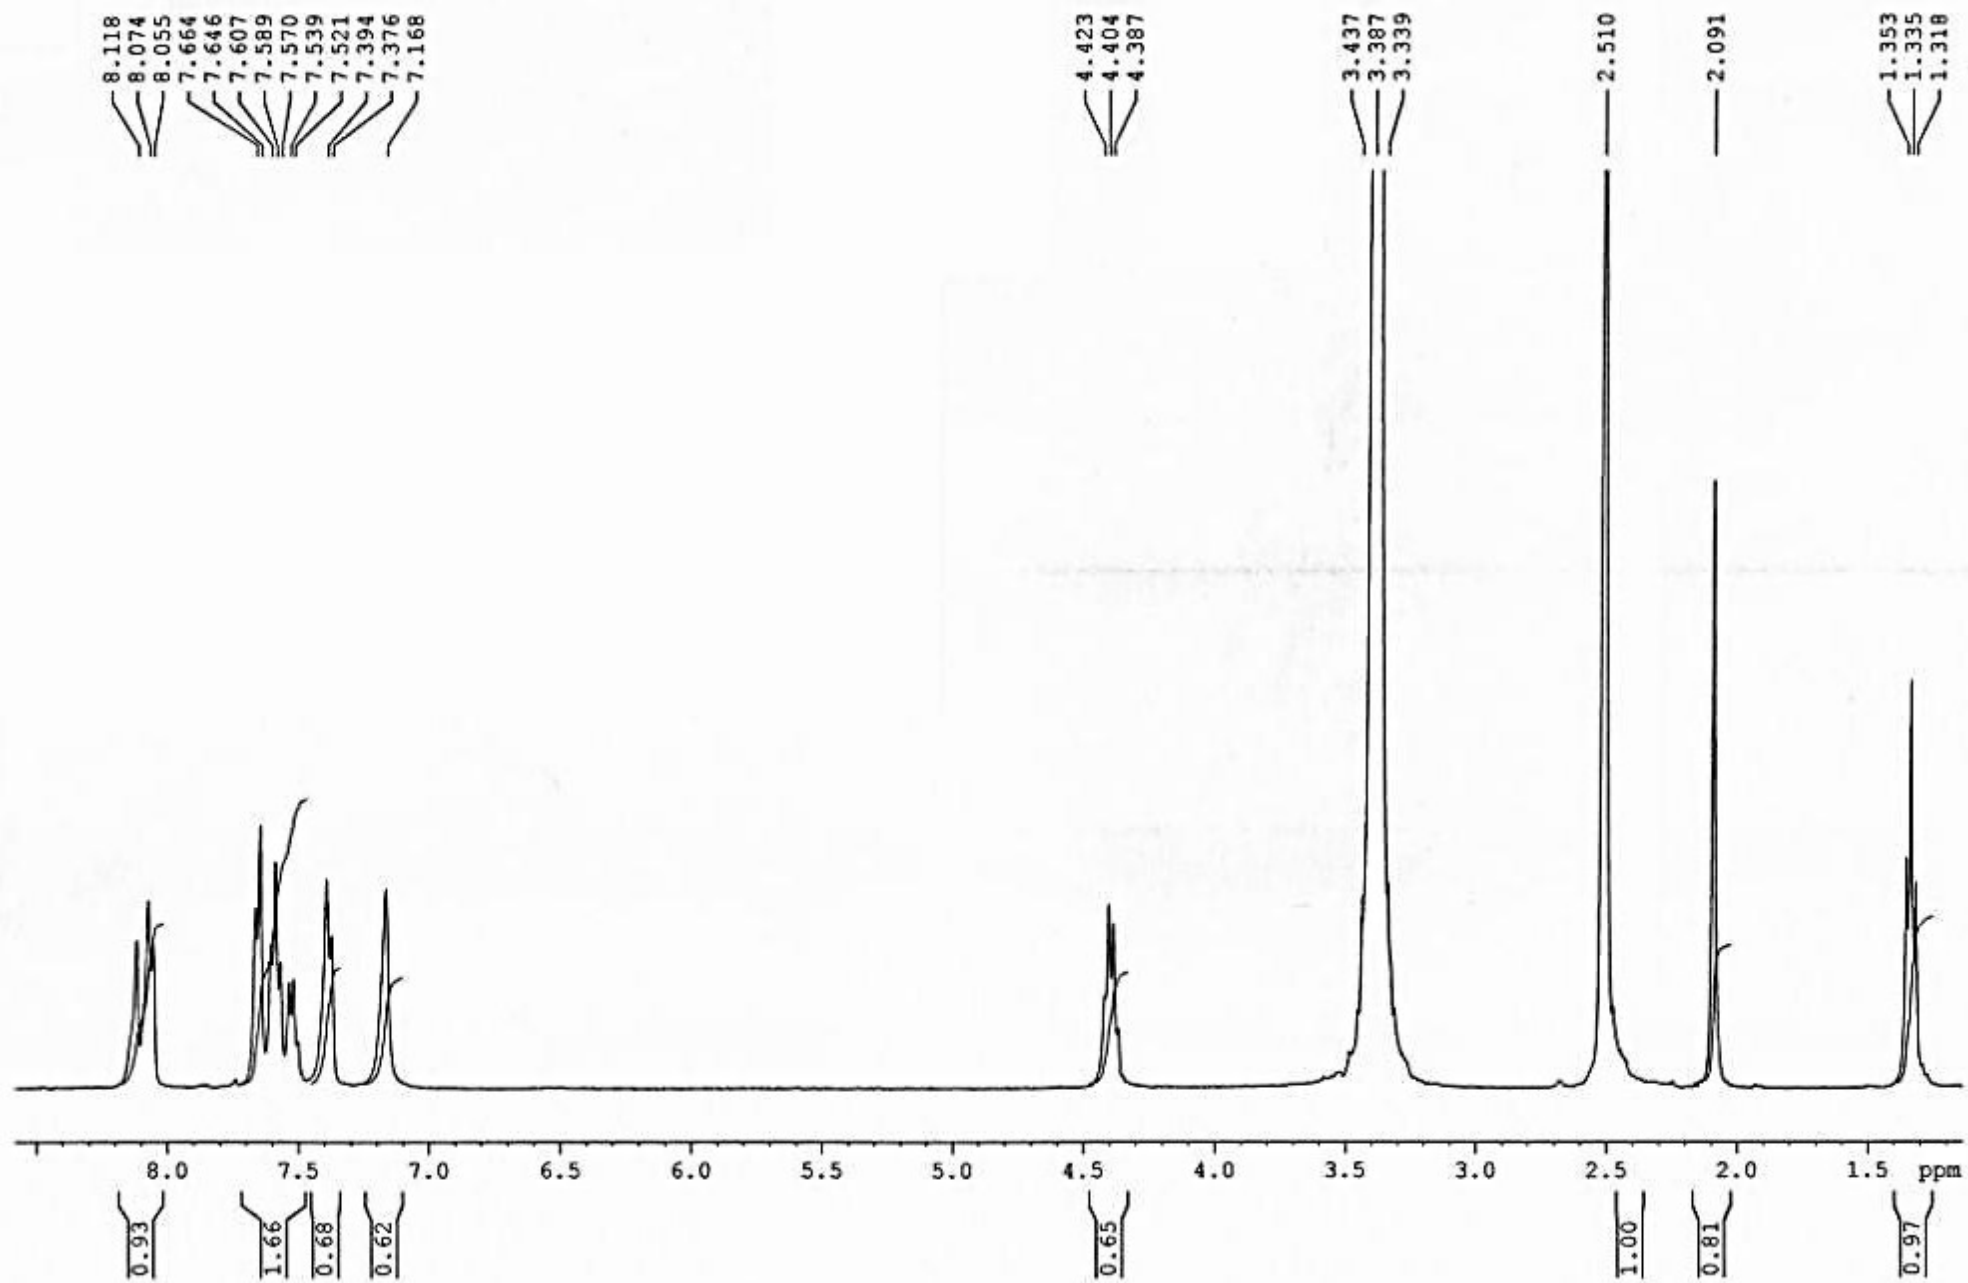

<sup>1</sup>H NMR for the compound **9d**

<sup>13</sup>C decoupled

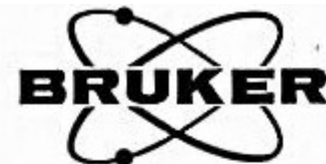

162.16  
161.54  
161.48  
154.75  
150.63  
141.50  
140.47  
135.21  
134.38  
131.85  
129.57  
129.06  
128.83  
127.13  
126.66  
116.59  
109.84  
103.92

74.54

61.73

40.03  
39.92  
39.78  
39.64  
39.50  
39.36  
39.22  
39.08  
20.96  
20.29  
14.03

Current Data Parameters  
NAME 4CH3-13C  
EXPNO 1  
PROCNO 1

F2 - Acquisition Parameters  
Date\_ 20160604  
Time 1.00  
INSTRUM spect  
PROBHD 5 mm PABBO BB-  
PULPROG zgpg30  
TD 65536  
SOLVENT DMSO  
NS 5120  
DS 4  
SWH 36057.691 Hz  
FIDRES 0.550197 Hz  
AQ 0.9087659 sec  
RG 203  
DW 13.867 usec  
DE 50.00 usec  
TE 298.0 K  
D1 2.0000000 sec  
D11 0.0300000 sec  
TDO 1

==== CHANNEL f1 =====  
SFO1 150.9178979 MHz  
NUC1 13C  
P1 8.80 usec  
PLW1 78.13500214 W

==== CHANNEL f2 =====  
SFO2 600.1324005 MHz  
NUC2 1H  
CPDPRG[2] waltz65  
PCPD2 70.00 usec  
PLW2 27.82500076 W  
PLW12 0.63804001 W  
PLW13 0.31264001 W

F2 - Processing parameters  
SI 32768  
SF 150.9028834 MHz  
WDW EM  
SSB 0  
LB 1.00 Hz  
GB 0  
PC 1.40

220 210 200 190 180 170 160 150 140 130 120 110 100 90 80 70 60 50 40 30 20 10 0 ppm

<sup>13</sup>C NMR for the compound 9d

<sup>13</sup>C decoupled spectra Dr.Saleh 4CH3 in DMSO

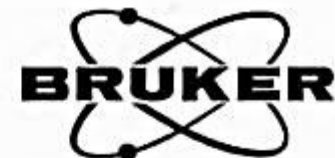

Current Data Parameters  
 NAME 4CH3-13C  
 EXPNO 1  
 PROCNO 1

F2 - Acquisition Parameters  
 Date 20160604  
 Time 1.00  
 INSTRUM spect  
 PROBHD 5 mm PABBO BB-  
 PULPROG zgpg30  
 TD 65536  
 SOLVENT DMSO  
 NS 5120  
 DS 4  
 SWH 36057.691 Hz  
 FIDRES 0.550197 Hz  
 AQ 0.9087659 sec  
 RG 203  
 DW 13.867 usec  
 DE 50.00 usec  
 TE 298.0 K  
 D1 2.0000000 sec  
 D11 0.0300000 sec  
 TD0 1

----- CHANNEL f1 -----  
 SFO1 150.9178979 MHz  
 NUC1 13C  
 P1 8.80 usec  
 PLW1 78.13500214 W

----- CHANNEL f2 -----  
 SFO2 600.1324005 MHz  
 NUC2 1H  
 CPDPRG2 waltz65  
 PCPD2 70.00 usec  
 PLW2 27.82500076 W  
 PLW12 0.63804001 W  
 PLW13 0.31264001 W

F2 - Processing parameters  
 SI 32768  
 SF 150.9028834 MHz  
 WDW EM  
 SSB 0  
 LB 1.00 Hz  
 GB 0  
 PC 1.40

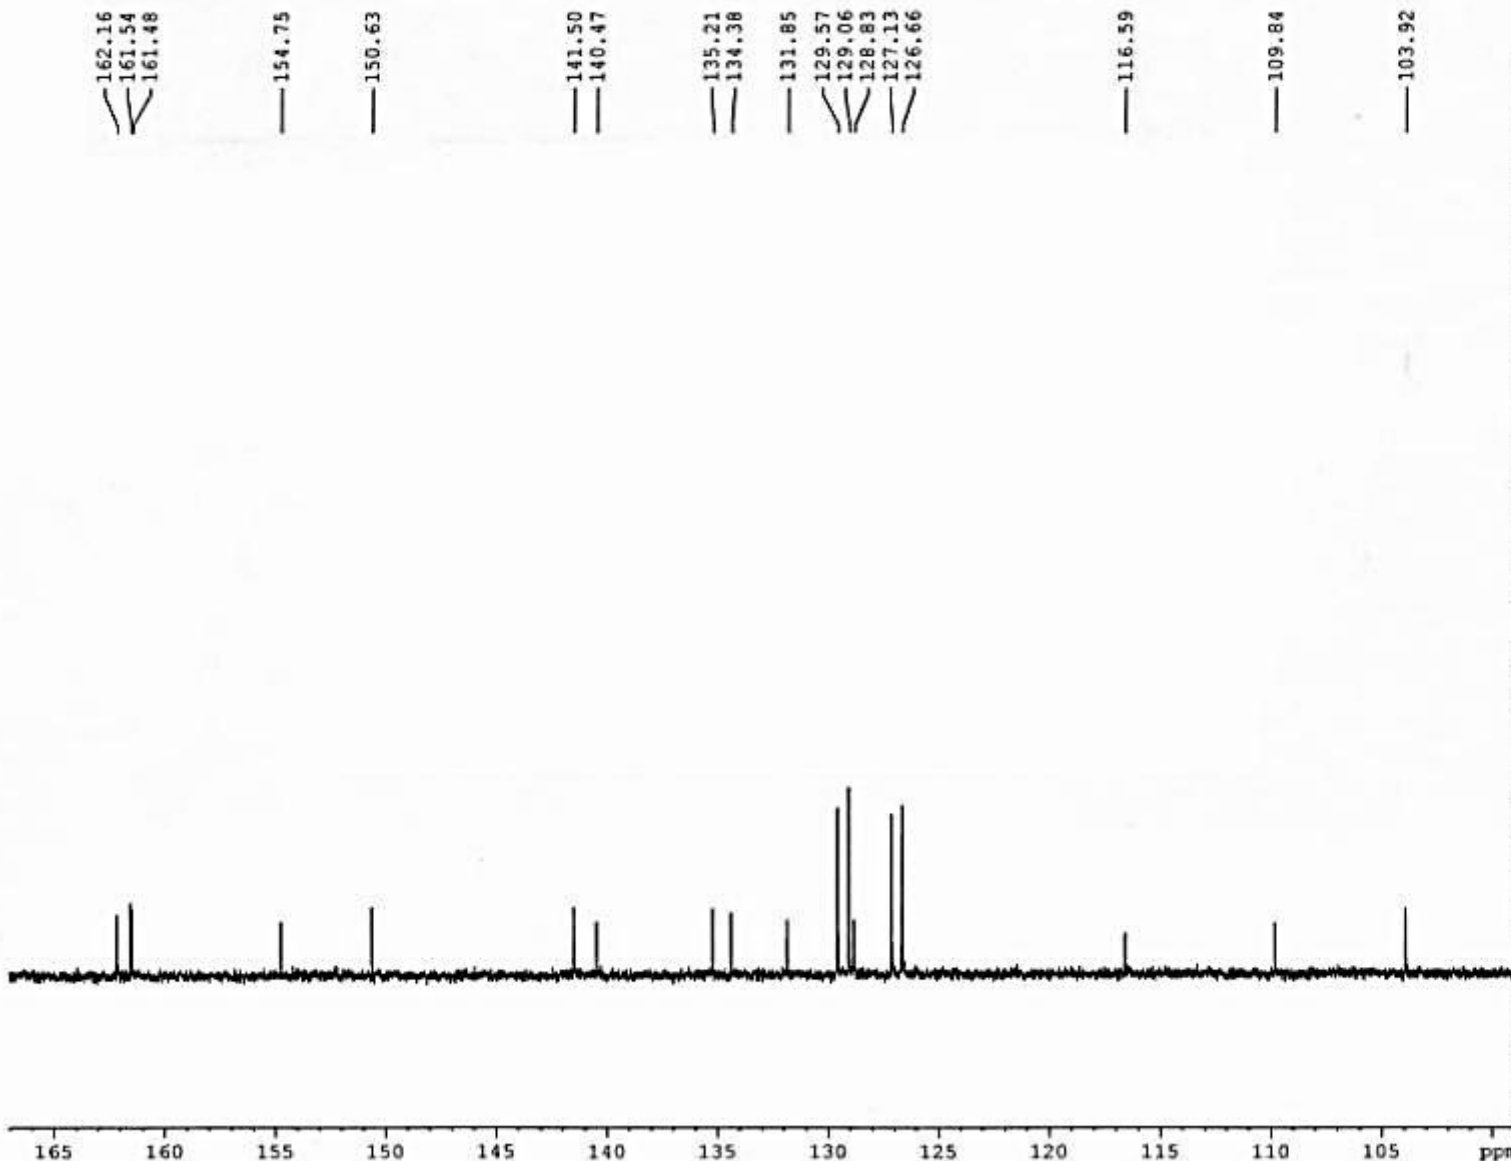

<sup>13</sup>C NMR for the compound **9d**

C:\Xcalibur\Data\saleh\MS-4CH3  
11/4/2015 1:34:51 PM

GC MS DFS- Thermo  
Project No: GS01/03

MS-4CH3

MS-4CH3 #216 RT: 9.76 AV: 1 NL: 1.26E7  
T: + c EI Full ms [ 49.50-1000.50]

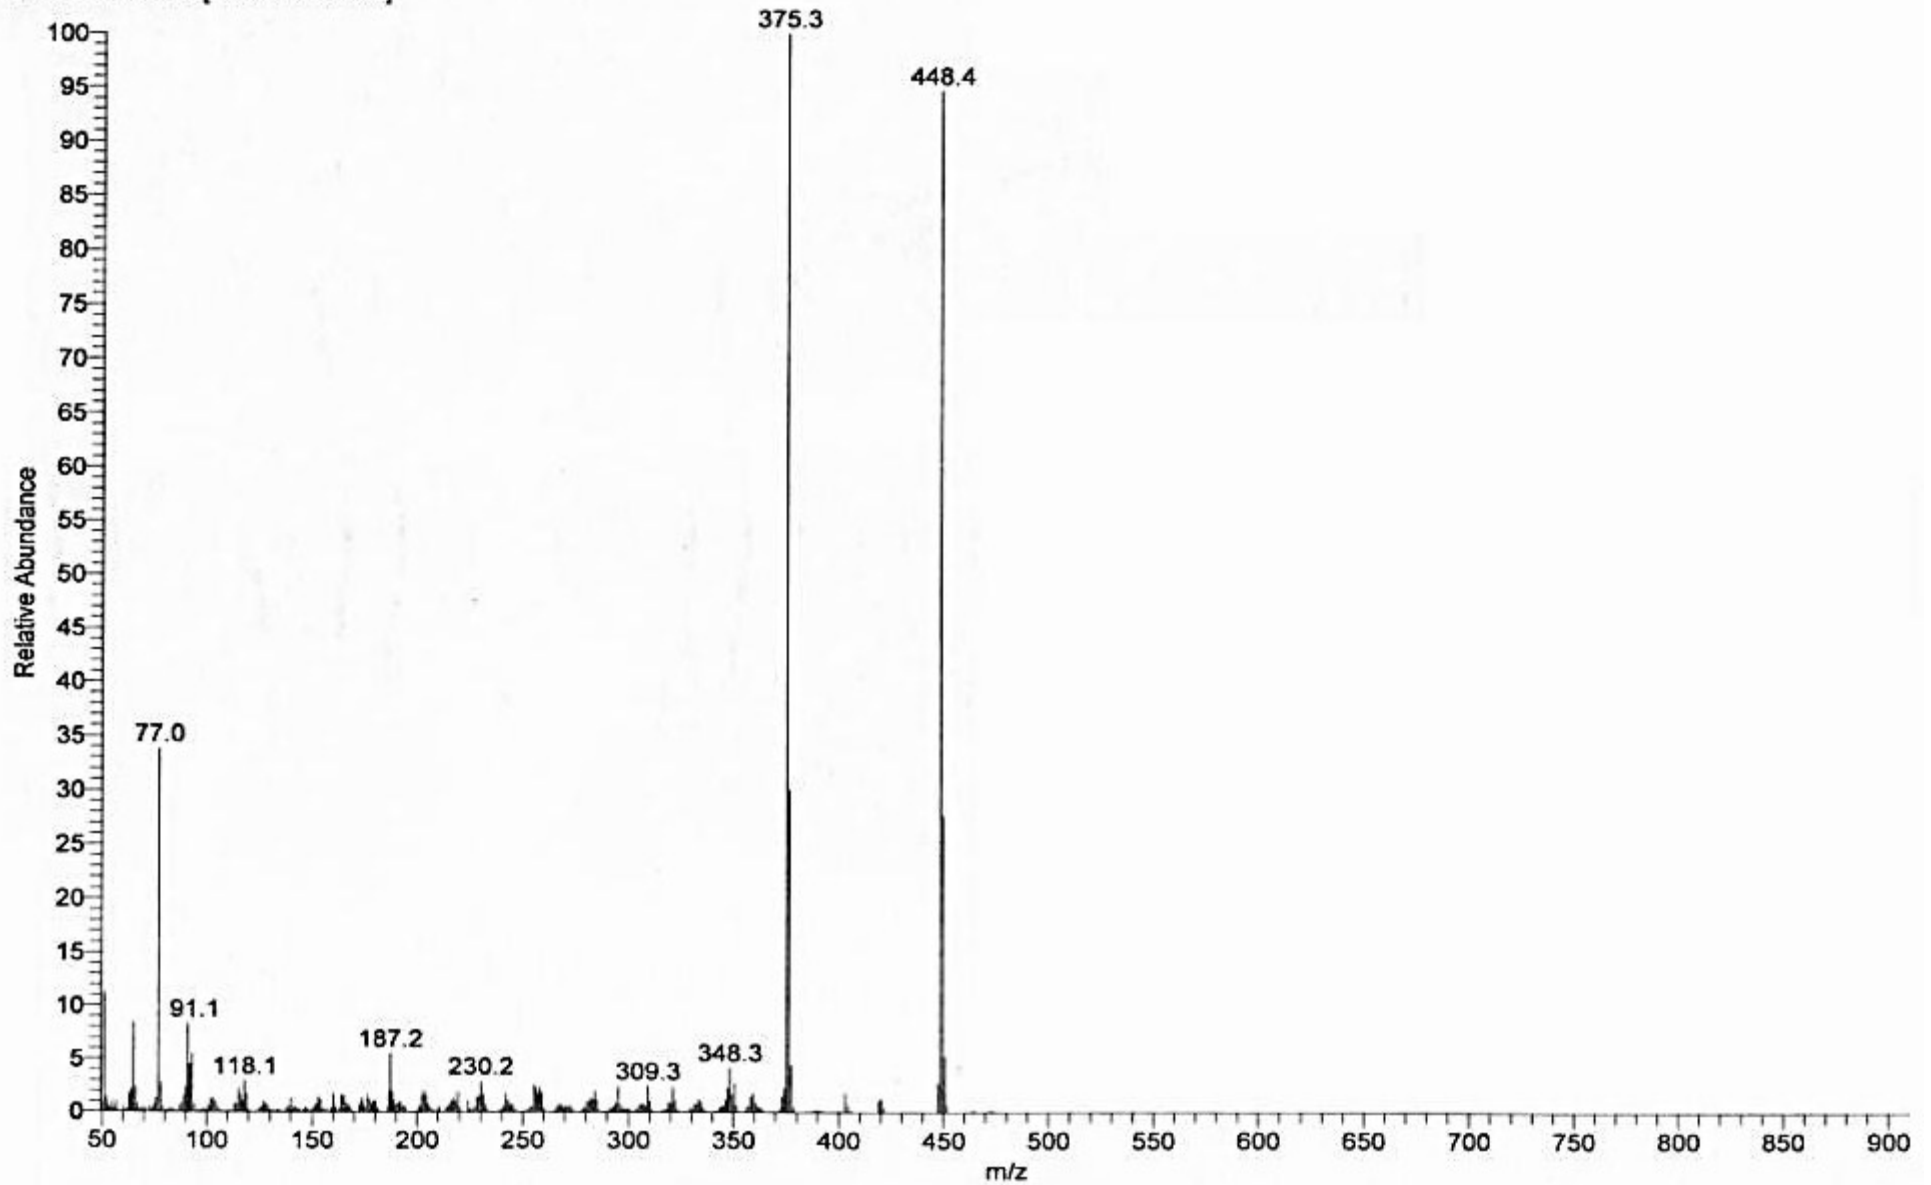

Mass spectra for the compound **9d**

HRMS-MS4CH3-c1 #97 RT: 8.62 AV: 1 NL: 4.23E6  
T: + c EI Full ms [ 419.50-470.50]

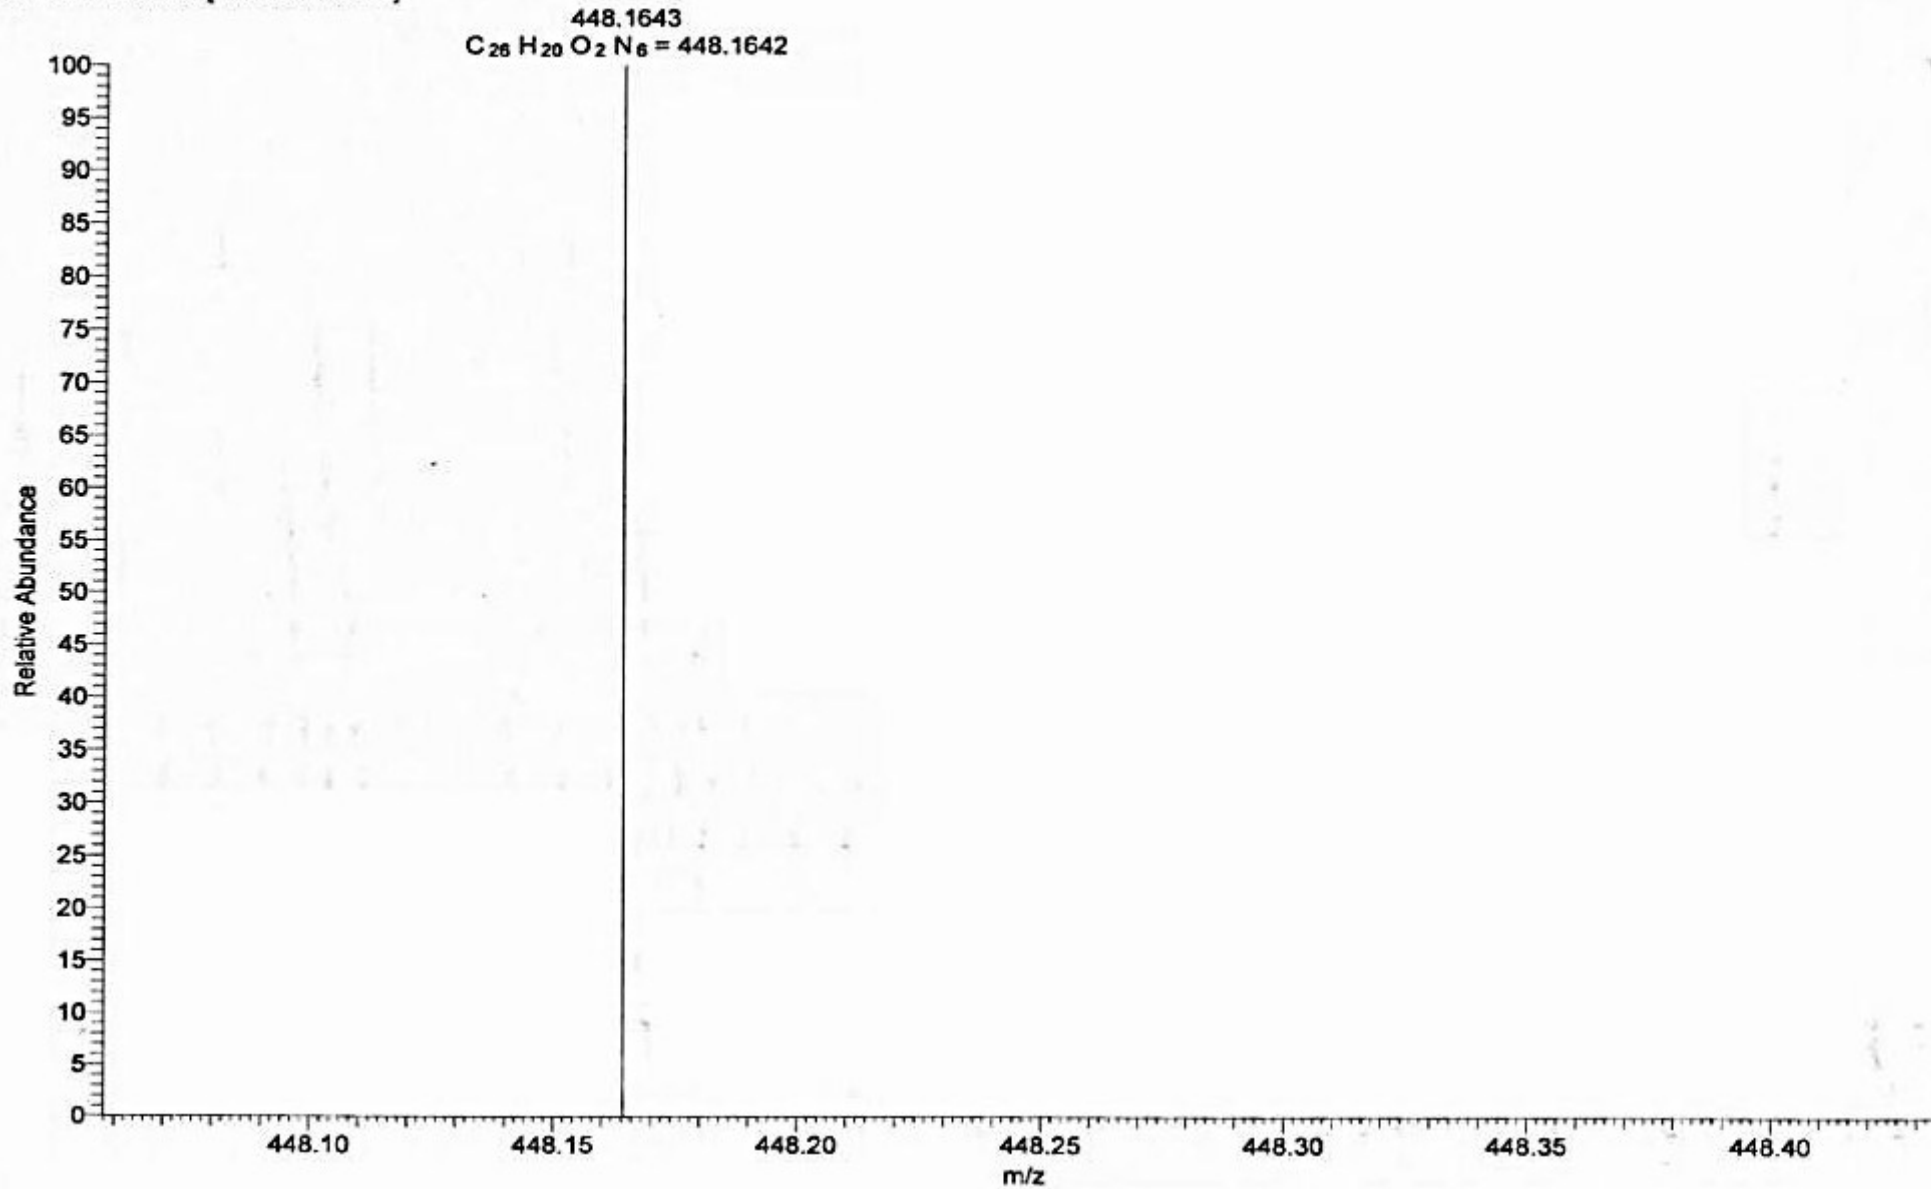

High resolution mass spectra for compound **9d**



<sup>1</sup>H spectra Dr.Saleh MS 2CH3 in DMSO

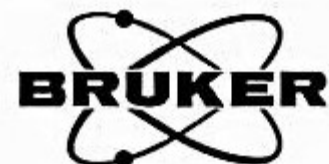

7.655  
7.653  
7.652  
7.648  
7.598  
7.595  
7.586  
7.584  
7.575  
7.572  
7.534  
7.532  
7.530  
7.523  
7.520  
7.517  
7.509  
7.508  
7.506  
7.492  
7.479  
7.420  
7.418  
7.410  
7.406  
7.396  
7.394  
7.372  
7.360  
7.348  
7.346  
7.186  
4.372  
4.361  
4.349  
4.337  
3.330  
2.501  
2.436

1.303  
1.291  
1.279

Current Data Parameters  
NAME MS2CH3  
EXPNO 4  
PROCNO 1

F2 - Acquisition Parameters  
Date\_ 20160724  
Time 10.09  
INSTRUM spect  
PROBHD 5 mm PABBO BB-  
PULPROG zg30  
TD 65536  
SOLVENT DMSO  
NS 16  
DS 2  
SWH 12335.526 Hz  
FIDRES 0.188225 Hz  
AQ 2.6563926 sec  
RG 203  
DW 40.533 usec  
DE 20.00 usec  
TE 298.0 K  
DI 1.00000000 sec  
TD0 1

----- CHANNEL f1 -----  
SF01 600.1337060 MHz  
NUC1 1H  
P1 10.60 usec  
PLW1 27.82500076 W

F2 - Processing parameters  
SI 32768  
SF 600.1300000 MHz  
WDW EM  
SSB 0  
LB 0.30 Hz  
GB 0  
PC 1.00

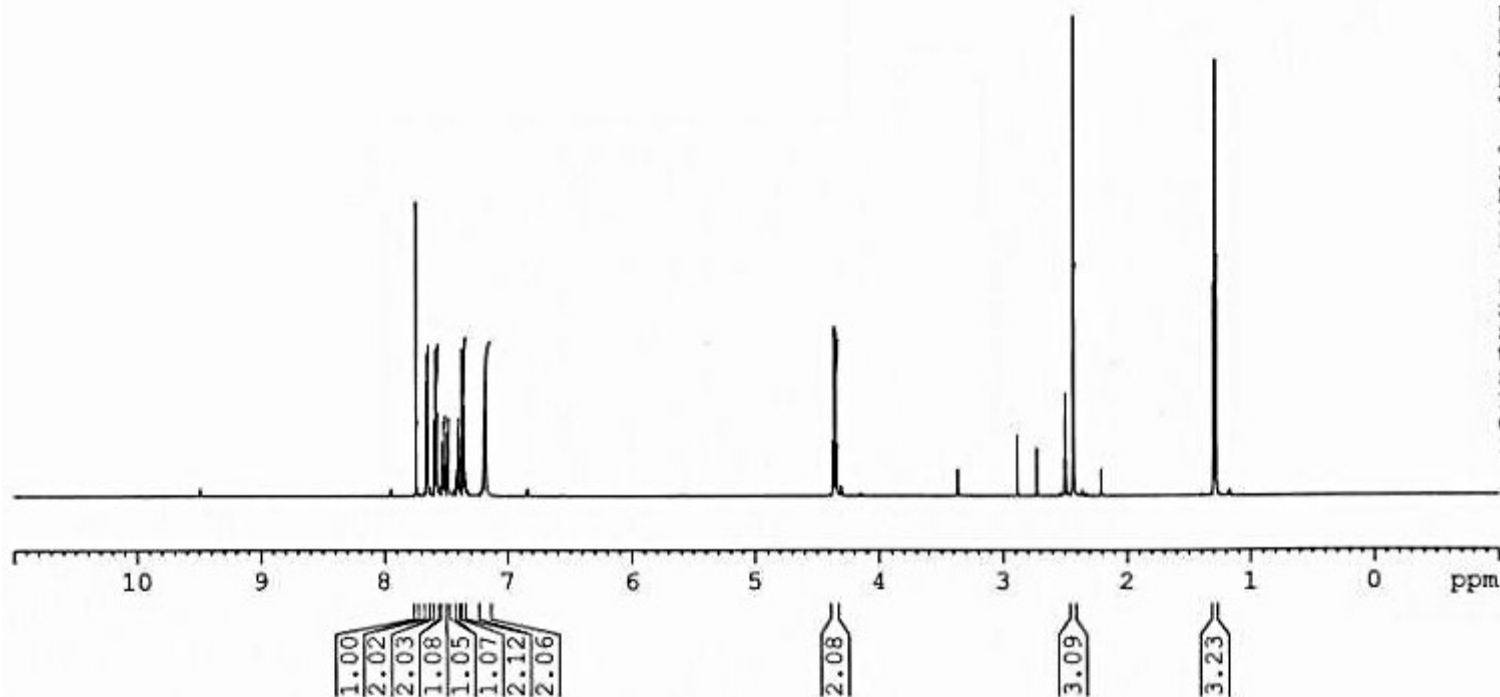

<sup>1</sup>H NMR for the compound 9e

<sup>1</sup>H spectra Dr.Saleh MS 2CH3 in DMSO

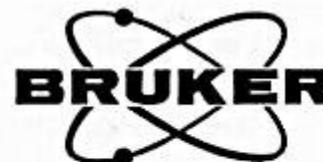

7.742  
7.667  
7.665  
7.662  
7.655  
7.653  
7.652  
7.648  
7.598  
7.595  
7.586  
7.584  
7.575  
7.572  
7.534  
7.532  
7.530  
7.523  
7.520  
7.517  
7.509  
7.508  
7.506  
7.492  
7.479  
7.420  
7.418  
7.410  
7.406  
7.396  
7.394  
7.372  
7.360  
7.348  
7.346  
— 7.186

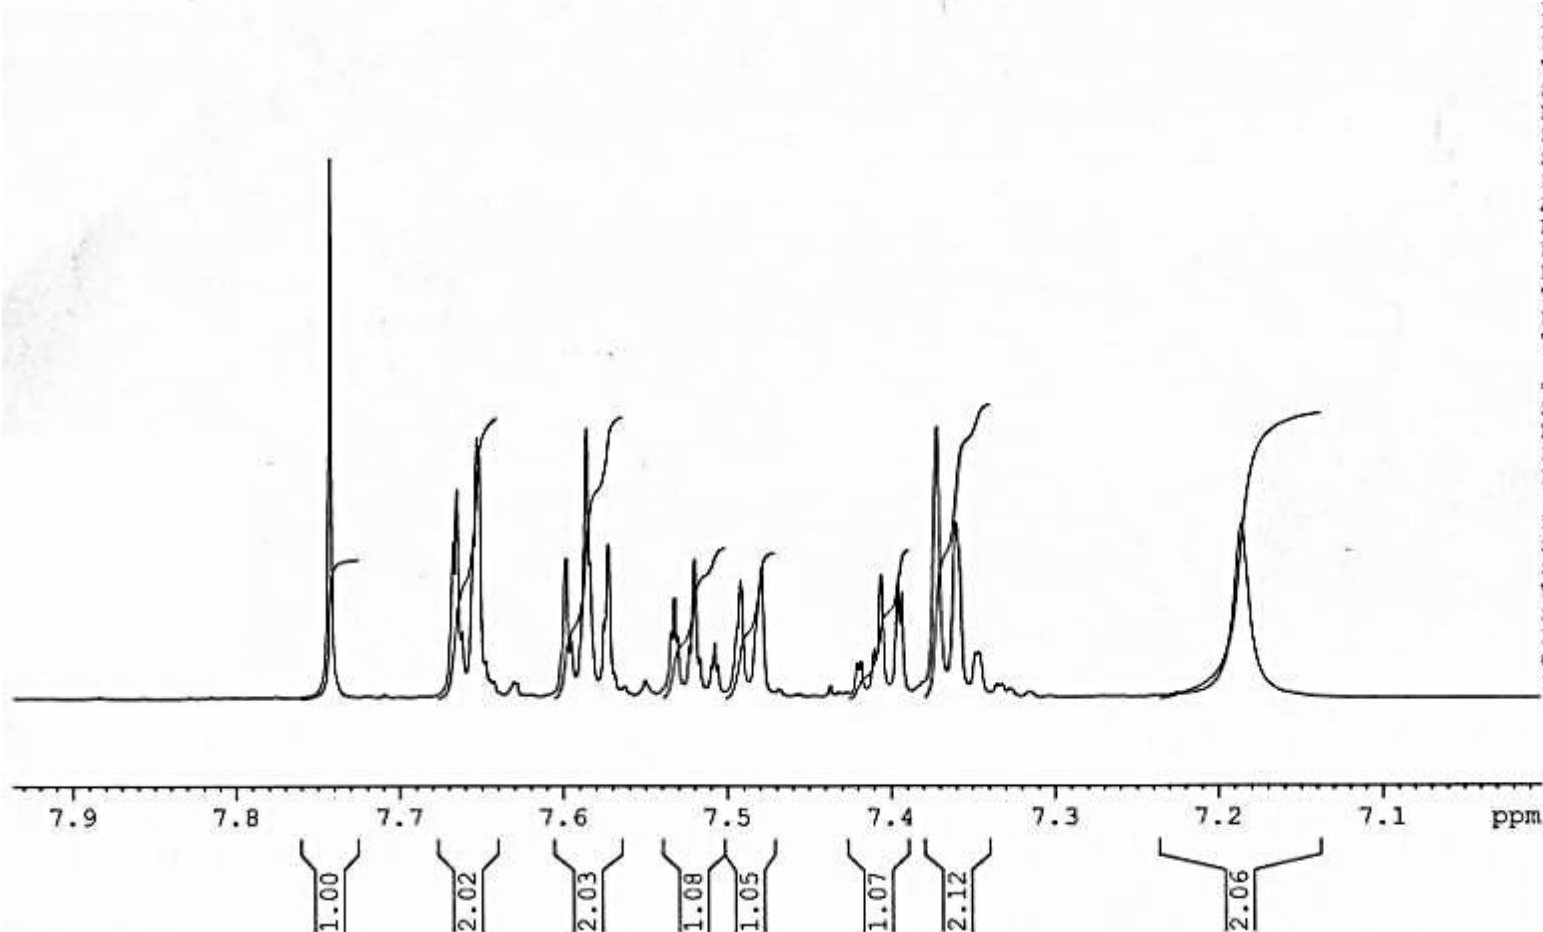

Current Data Parameters  
NAME MS2CH3  
EXPNO 4  
PROCNO 1

F2 - Acquisition Parameters  
Date\_ 20160724  
Time\_ 10.09  
INSTRUM spect  
PROBHD 5 mm PABBO BB-  
PULPROG zg30  
TD 65536  
SOLVENT DMSO  
NS 16  
DS 2  
SWH 12335.526 Hz  
FIDRES 0.188225 Hz  
AQ 2.6563926 sec  
RG 203  
DW 40.533 usec  
DE 20.00 usec  
TE 298.0 K  
D1 1.0000000 sec  
TDO 1

----- CHANNEL f1 -----  
SF01 600.1337060 MHz  
NUC1 1H  
P1 10.60 usec  
PLW1 27.82500076 W

F2 - Processing parameters  
SI 32768  
SF 600.1300000 MHz  
WDW EM  
SSB 0  
LB 0.30 Hz  
GB 0  
PC 1.00

<sup>1</sup>H NMR for the compound 9e

<sup>13</sup>C decoupled spectra Dr.Saleh MS 2CH3 in DMSO

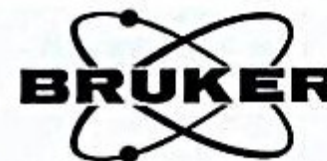

165.43  
162.11  
161.49  
154.49  
150.79  
141.53  
139.72  
135.80  
134.18  
131.30  
130.96  
129.33  
129.08  
129.03  
128.86  
126.68  
126.06  
116.58  
109.43  
108.17

74.42

61.71

40.04  
39.92  
39.78  
39.64  
39.50  
39.36  
39.22  
39.08  
20.31  
13.99

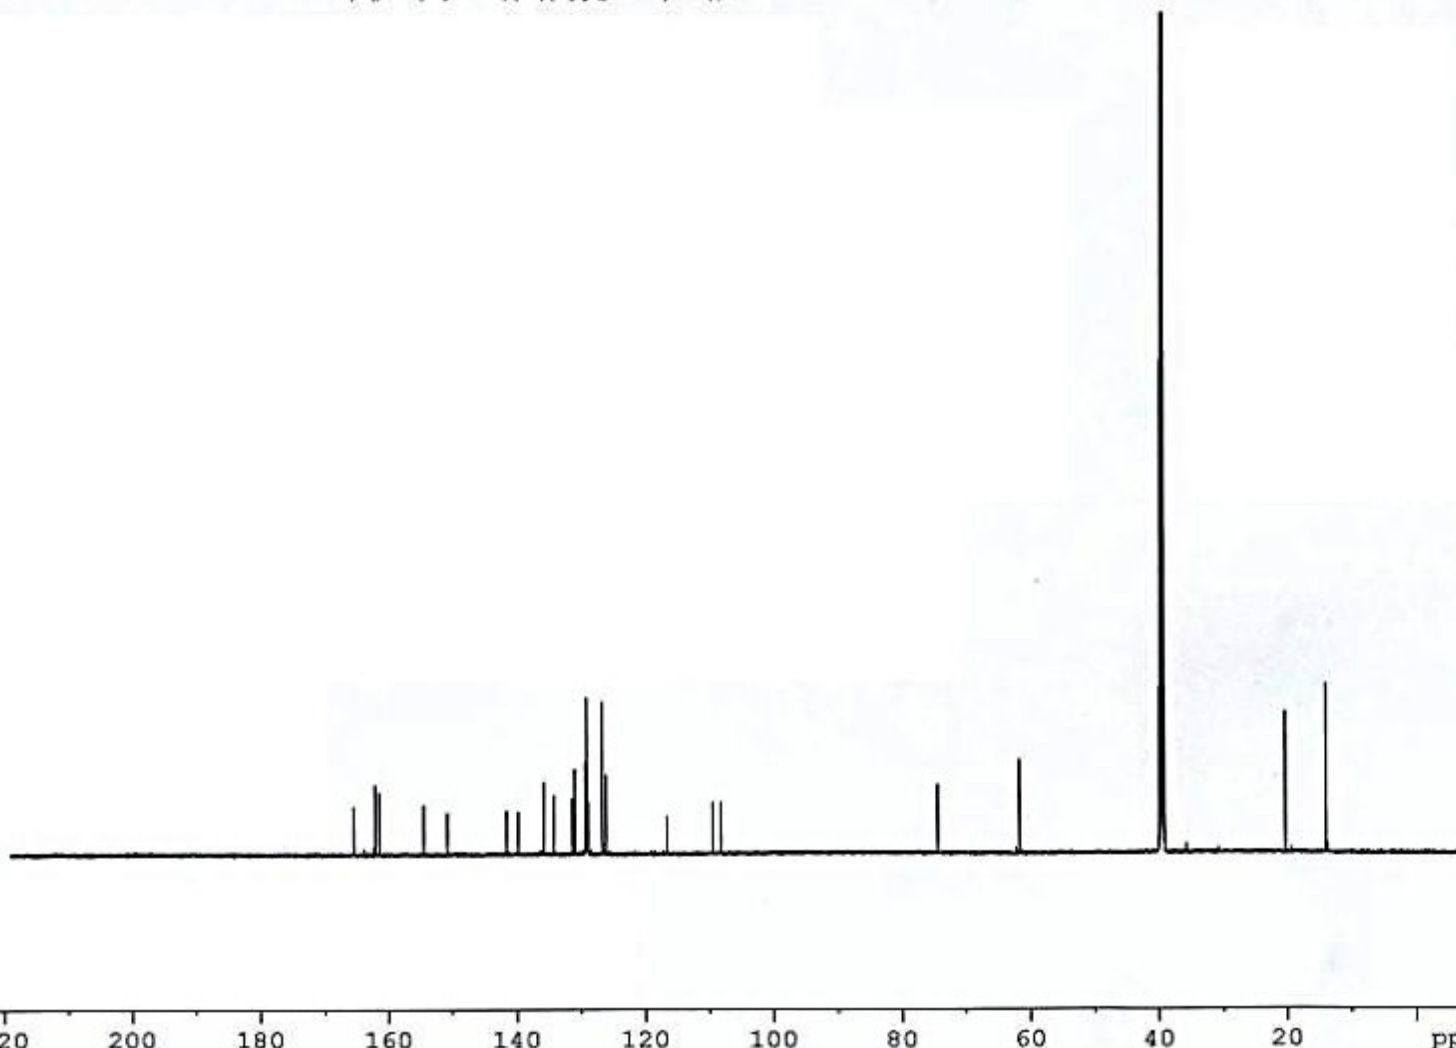

Current Data Parameters  
NAME MS2CH3  
EXPNO 2  
PROCNO 1

F2 - Acquisition Parameters  
Date\_ 20160724  
Time\_ 10.46  
INSTRUM spect  
PROBHD 5 mm PABBO BB-  
PULPROG zgpg30  
TD 65536  
SOLVENT DMSO  
NS 1069  
DS 4  
SWH 36057.691 Hz  
FIDRES 0.550197 Hz  
AQ 0.9087659 sec  
RG 203  
DW 13.867 usec  
DE 50.00 usec  
TE 298.0 K  
D1 2.00000000 sec  
D11 0.03000000 sec  
TDO 1

----- CHANNEL f1 -----  
SFO1 150.9178979 MHz  
NUC1 13C  
P1 8.80 usec  
PLW1 78.13500214 W

----- CHANNEL f2 -----  
SFO2 600.1324005 MHz  
NUC2 1H  
CPDPRG[2] waltz65  
PCPD2 70.00 usec  
PLW2 27.82500076 W  
PLW12 0.63804001 W  
PLW13 0.31264001 W

F2 - Processing parameters  
SI 32768  
SF 150.9028830 MHz  
WDW EM  
SSB 0  
LB 1.00 Hz  
GB 0  
PC 1.40

<sup>13</sup>C NMR for the compound 9e

$^{13}\text{C}$  decoupled spectra Dr.Saleh MS 2CH3 in DMSO

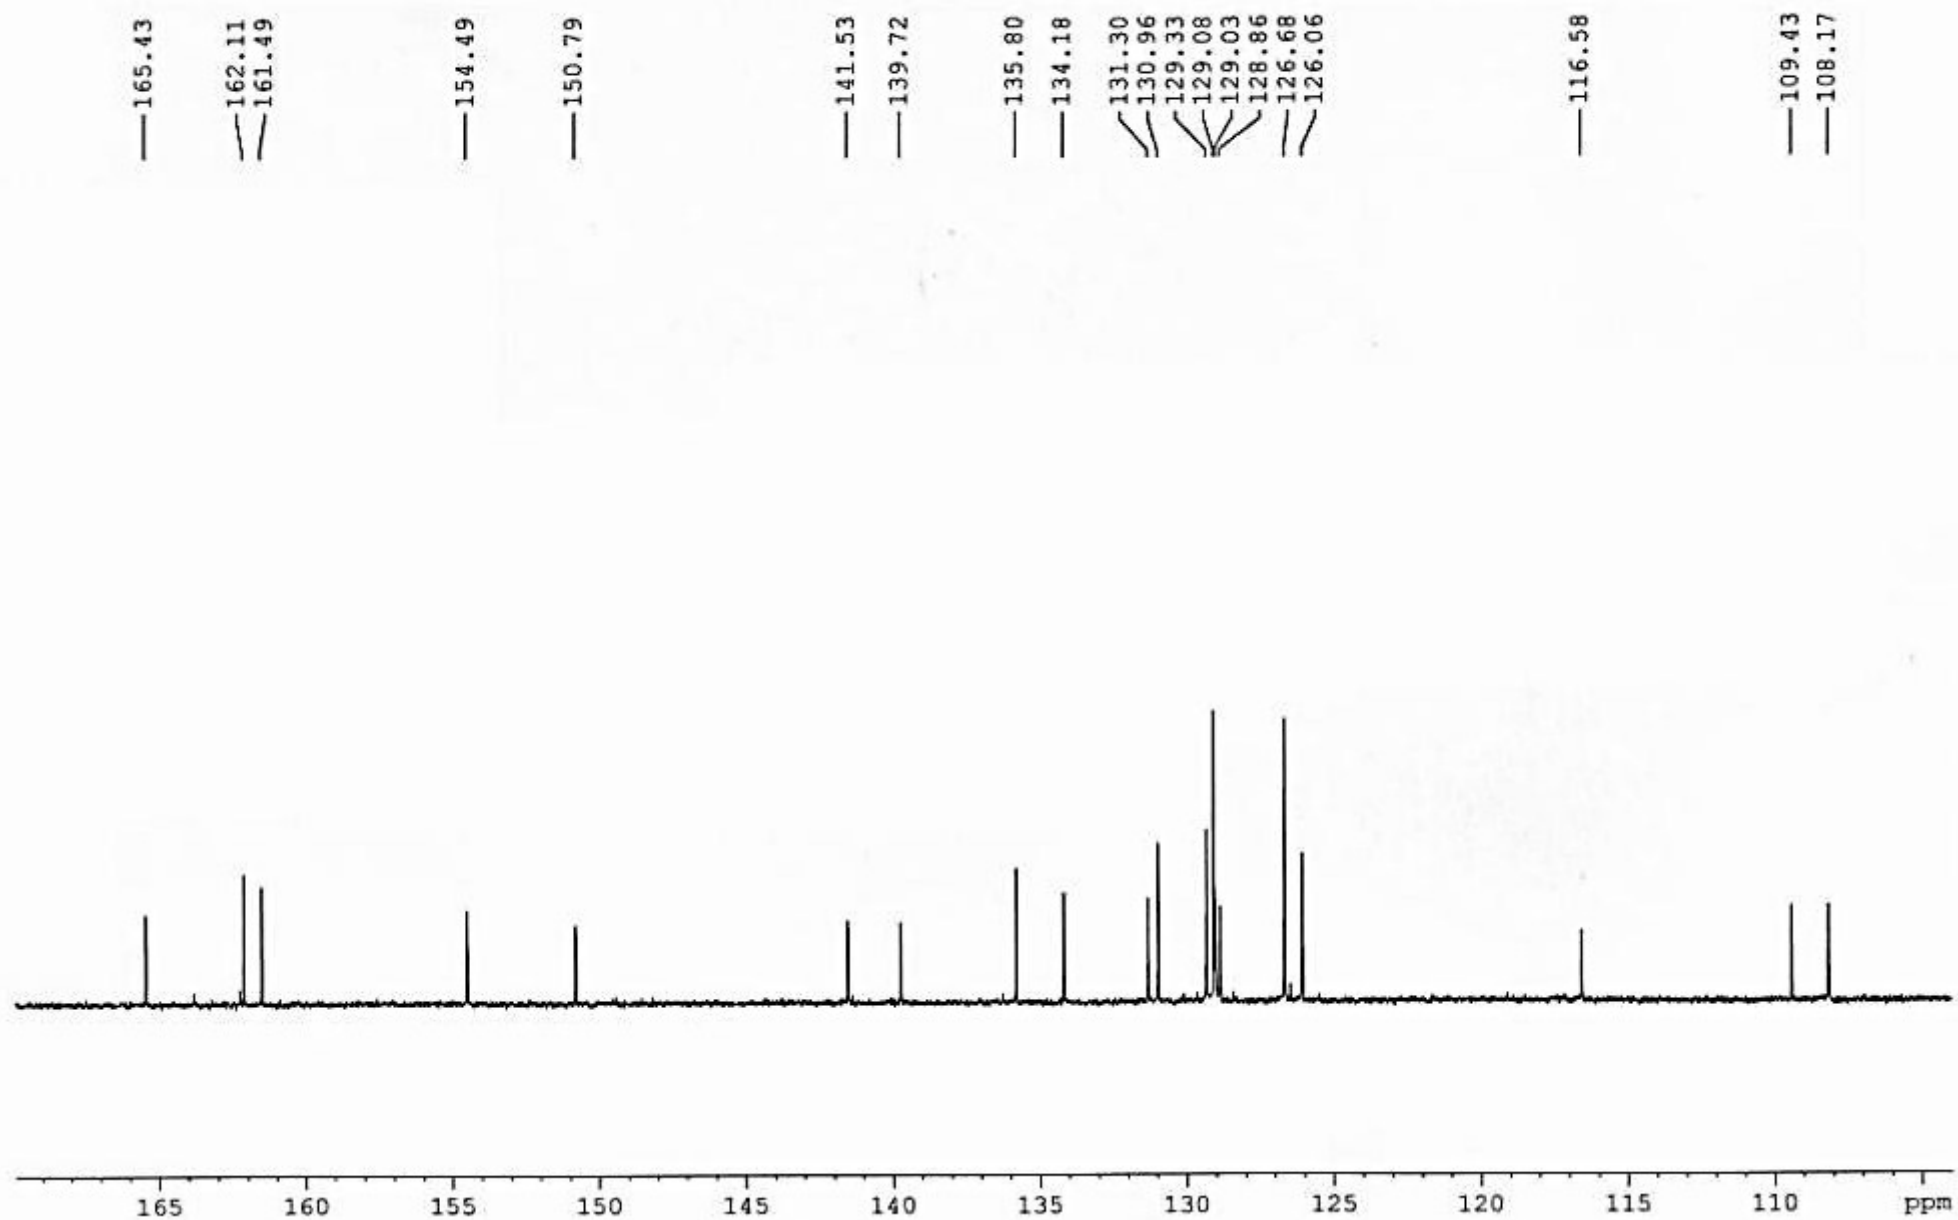

$^{13}\text{C}$  NMR for the compound **9e**

C:\Xcalibur\Data\saleh\MS-2CH3  
11/4/2015 1:13:09 PM

GC MS DFS- Thermo  
Project No: GS01/03

MS-2CH3

MS-2CH3 #165 RT: 7.35 AV: 1 NL: 1.91E7  
T: + c EI Full ms [ 49.50-1000.50]

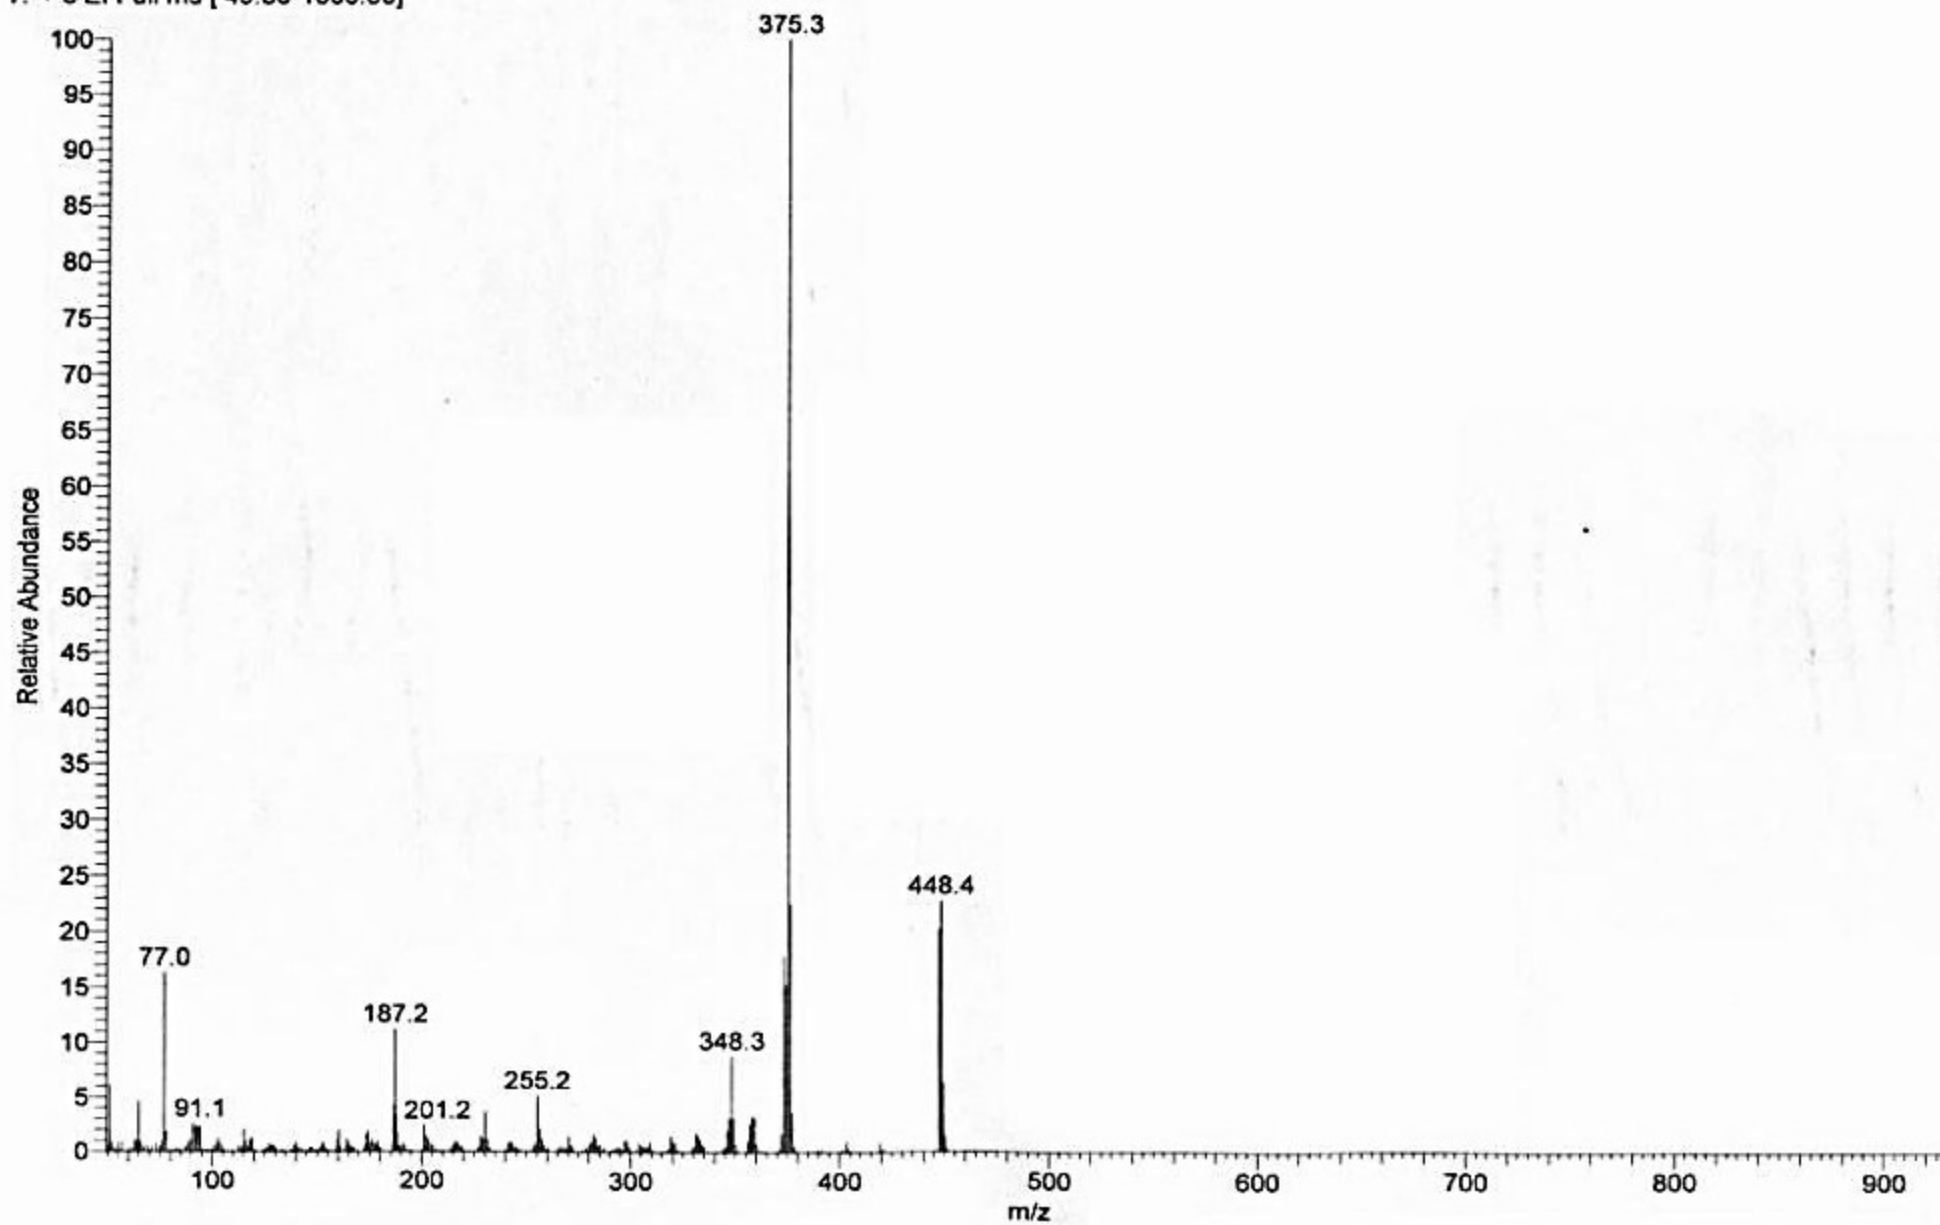

Mass spectra for the compound 9e

C:\Xcalibur\Data\saleh\HRMS-MS2CH3-c1  
11/25/2015 9:19:56 AM

GC MS DFS- Thermo  
Project No: GS01/03

HRMS-MS2CH3-c1 #12 RT: 7.17 AV: 1 NL: 1.76E3  
T: + c EI Full ms [ 399.50-500.50]

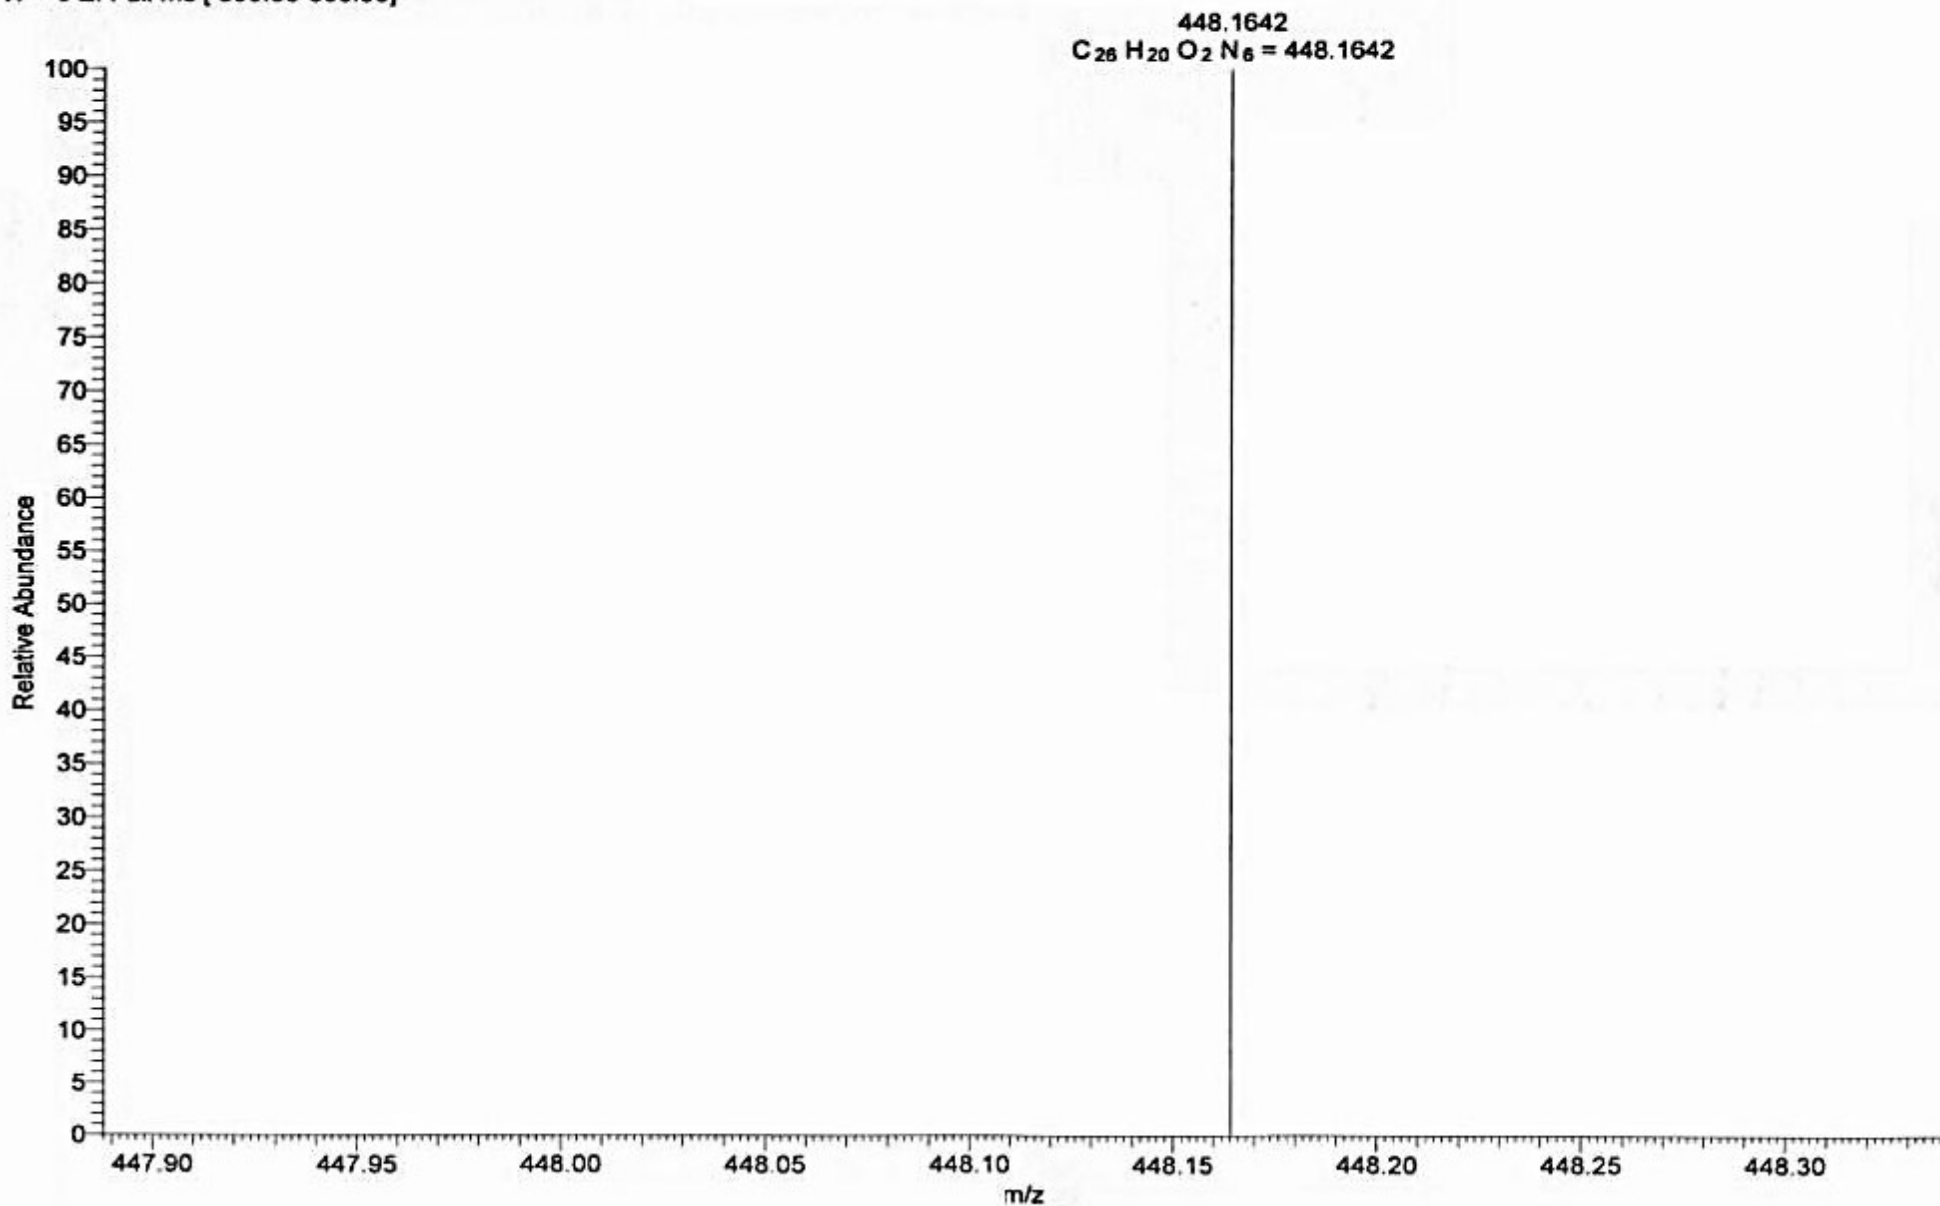

High resolution mass spectra for compound 9e

<sup>1</sup>H spectra Mostafa MS 4No2 in DMSO

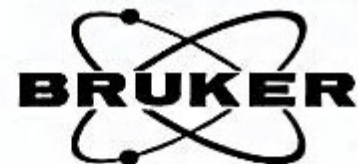

8.466  
8.449  
8.443  
8.427  
8.421  
8.404  
8.257  
7.688  
7.684  
7.665  
7.623  
7.605  
7.601  
7.585  
7.555  
7.536  
7.520  
7.320  
4.452  
4.434  
4.416  
4.400  
3.339  
2.518  
2.513  
2.509  
2.505  
2.500  
1.366  
1.348  
1.330

Current Data Parameters  
NAME Ms 4No2  
EXPNO 3  
PROCNO 1

F2 - Acquisition Parameters  
Date\_ 20151204  
Time 0.59  
INSTRUM spect  
PROBHD 5 mm QNP 1H/13  
PULPROG zg30  
TD 65536  
SOLVENT DMSO  
NS 16  
DS 2  
SWH 8278.146 Hz  
FIDRES 0.126314 Hz  
AQ 3.9584243 sec  
RG 912.3  
DW 60.400 usec  
DE 6.00 usec  
TE 295.6 K  
D1 1.00000000 sec  
TD0 1

----- CHANNEL f1 -----  
NUC1 1H  
P1 10.40 usec  
PL1 -2.00 dB  
SF01 400.1324710 MHz

F2 - Processing parameters  
SI 32768  
SF 400.1300000 MHz  
WDW EM  
SSB 0  
LB 0.30 Hz  
GB 0  
PC 1.00

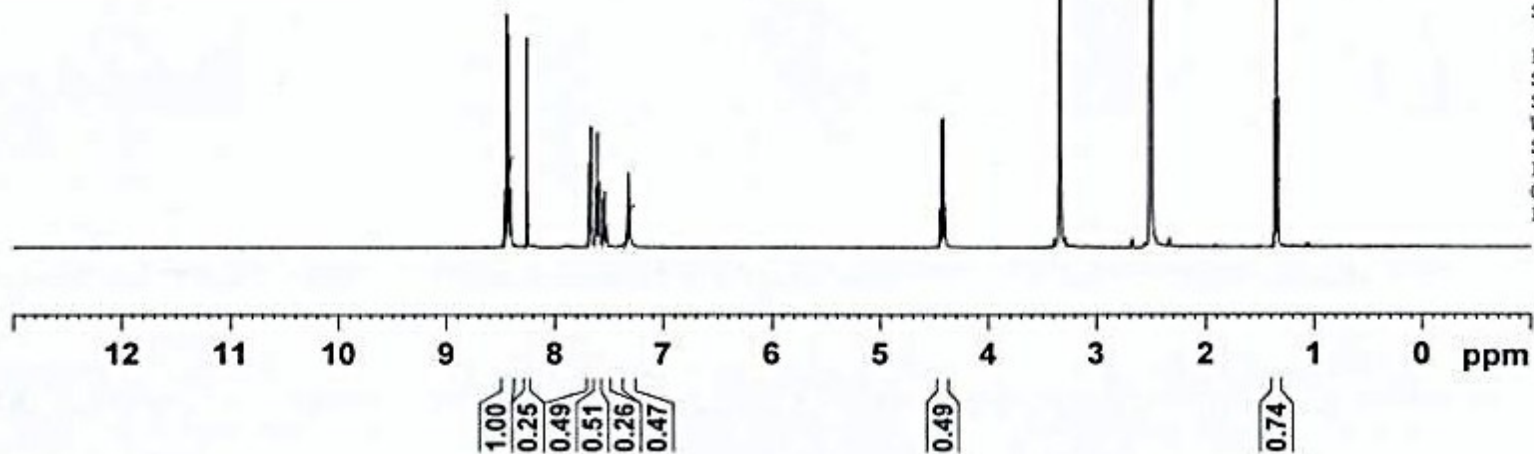

<sup>1</sup>H NMR for the compound 9f

<sup>1</sup>H spectra Mostafa MS 4No2 in DMSO

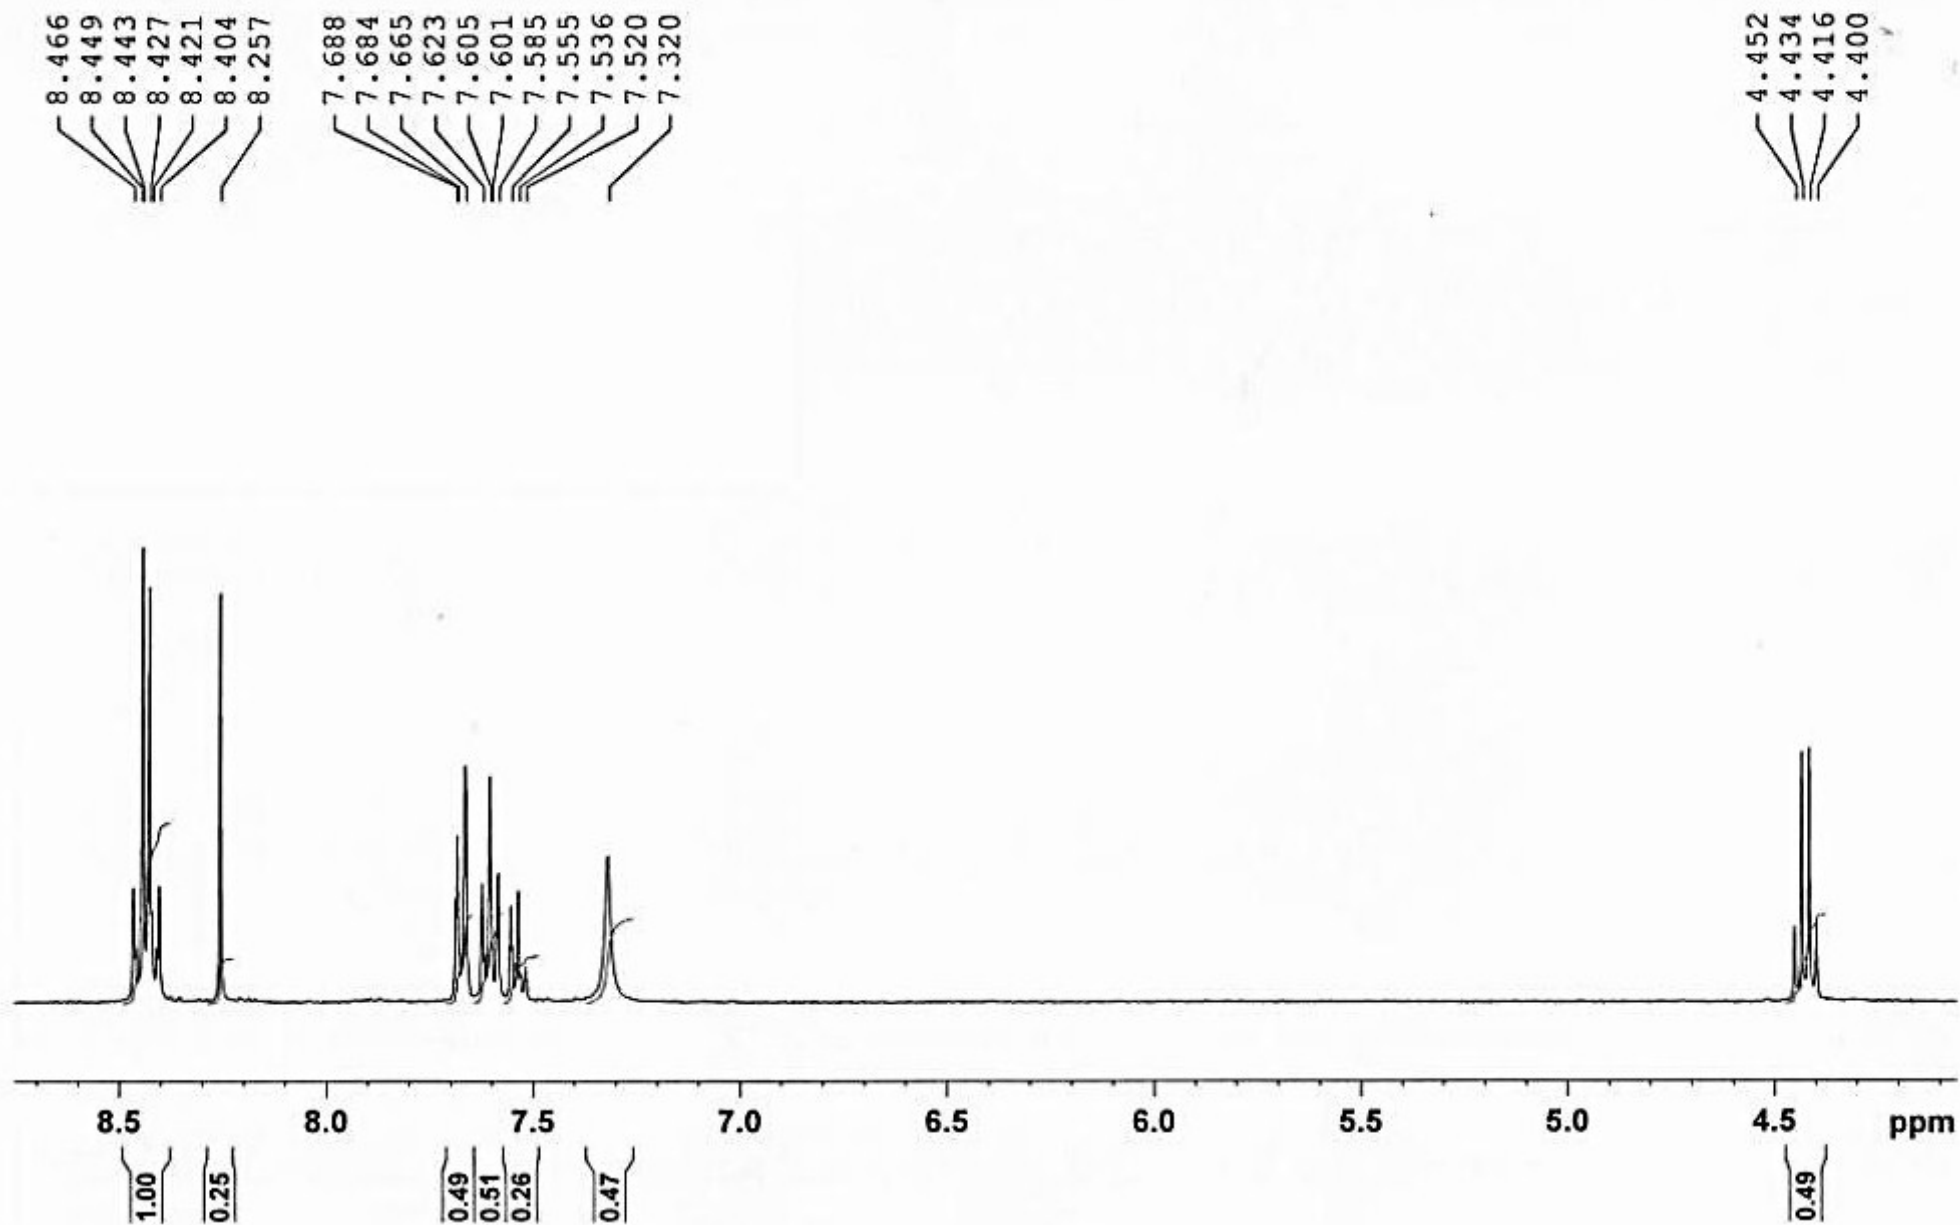

<sup>1</sup>H NMR for the compound 9f



<sup>13</sup>C decoupled spectra Mostafa MSHNo2 in DMSO

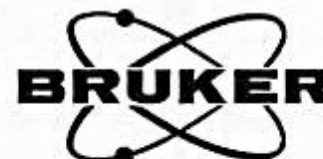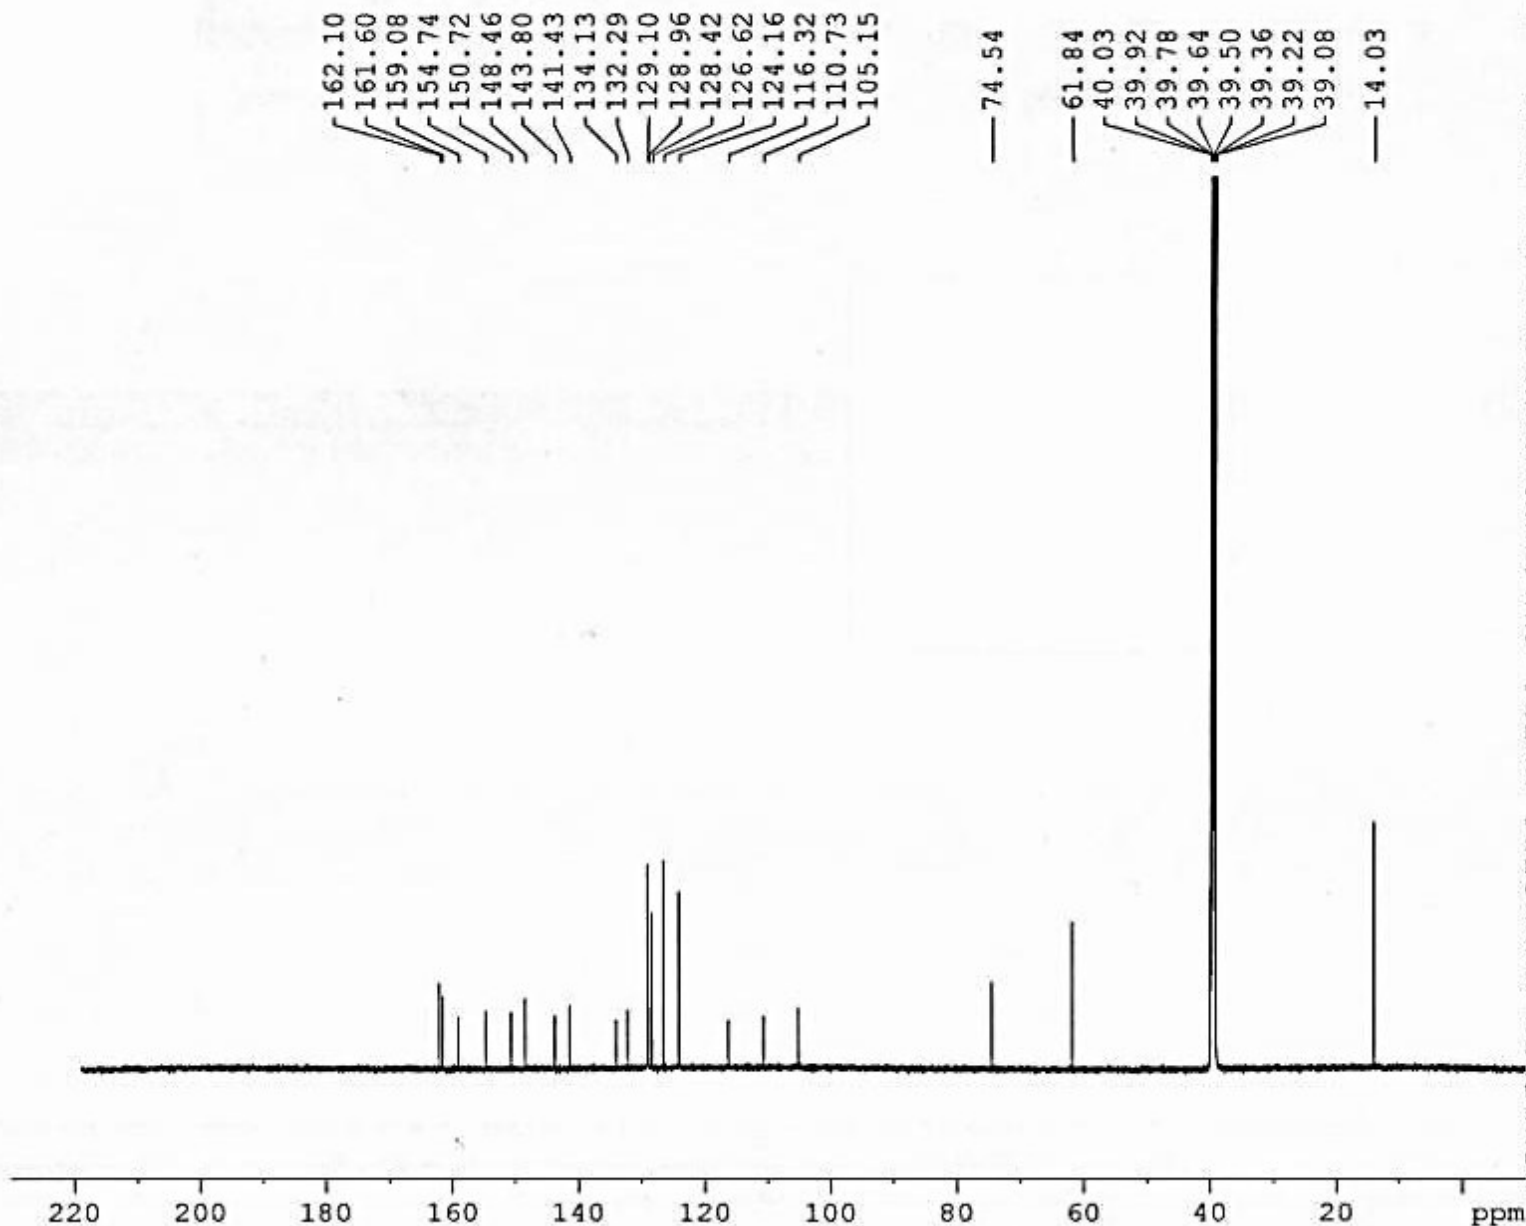

162.10  
161.60  
159.08  
154.74  
150.72  
148.46  
143.80  
141.43  
134.13  
132.29  
129.10  
128.96  
128.42  
126.62  
124.16  
116.32  
110.73  
105.15

74.54  
61.84  
40.03  
39.92  
39.78  
39.64  
39.50  
39.36  
39.22  
39.08  
14.03

Current Data Parameters  
NAME MSHNo2-13C  
EXPNO 1  
PROCNO 1

F2 - Acquisition Parameters  
Date\_ 20160607  
Time\_ 6.54  
INSTRUM spect  
PROBHD 5 mm PABBO BB-  
PULPROG zgpg30  
TD 65536  
SOLVENT DMSO  
NS 10240  
DS 4  
SWH 36057.691 Hz  
FIDRES 0.550197 Hz  
AQ 0.9087659 sec  
RG 203  
DW 13.867 usec  
DE 50.00 usec  
TE 298.0 K  
D1 2.0000000 sec  
D11 0.0300000 sec  
TDO 1

----- CHANNEL f1 -----  
SFO1 150.9178979 MHz  
NUC1 13C  
P1 8.80 usec  
PLW1 78.13500214 W

----- CHANNEL f2 -----  
SFO2 600.1324005 MHz  
NUC2 1H  
CPDPRG[2] waltz65  
PCPD2 70.00 usec  
PLW2 27.82500076 W  
PLW12 0.63804001 W  
PLW13 0.31264001 W

F2 - Processing parameters  
SI 32768  
SF 150.9028824 MHz  
WDW EM  
SSB 0  
LB 1.00 Hz  
GB 0  
PC 1.40

<sup>13</sup>C decoupled spectra Mostafa MSHNO2 in DMSO

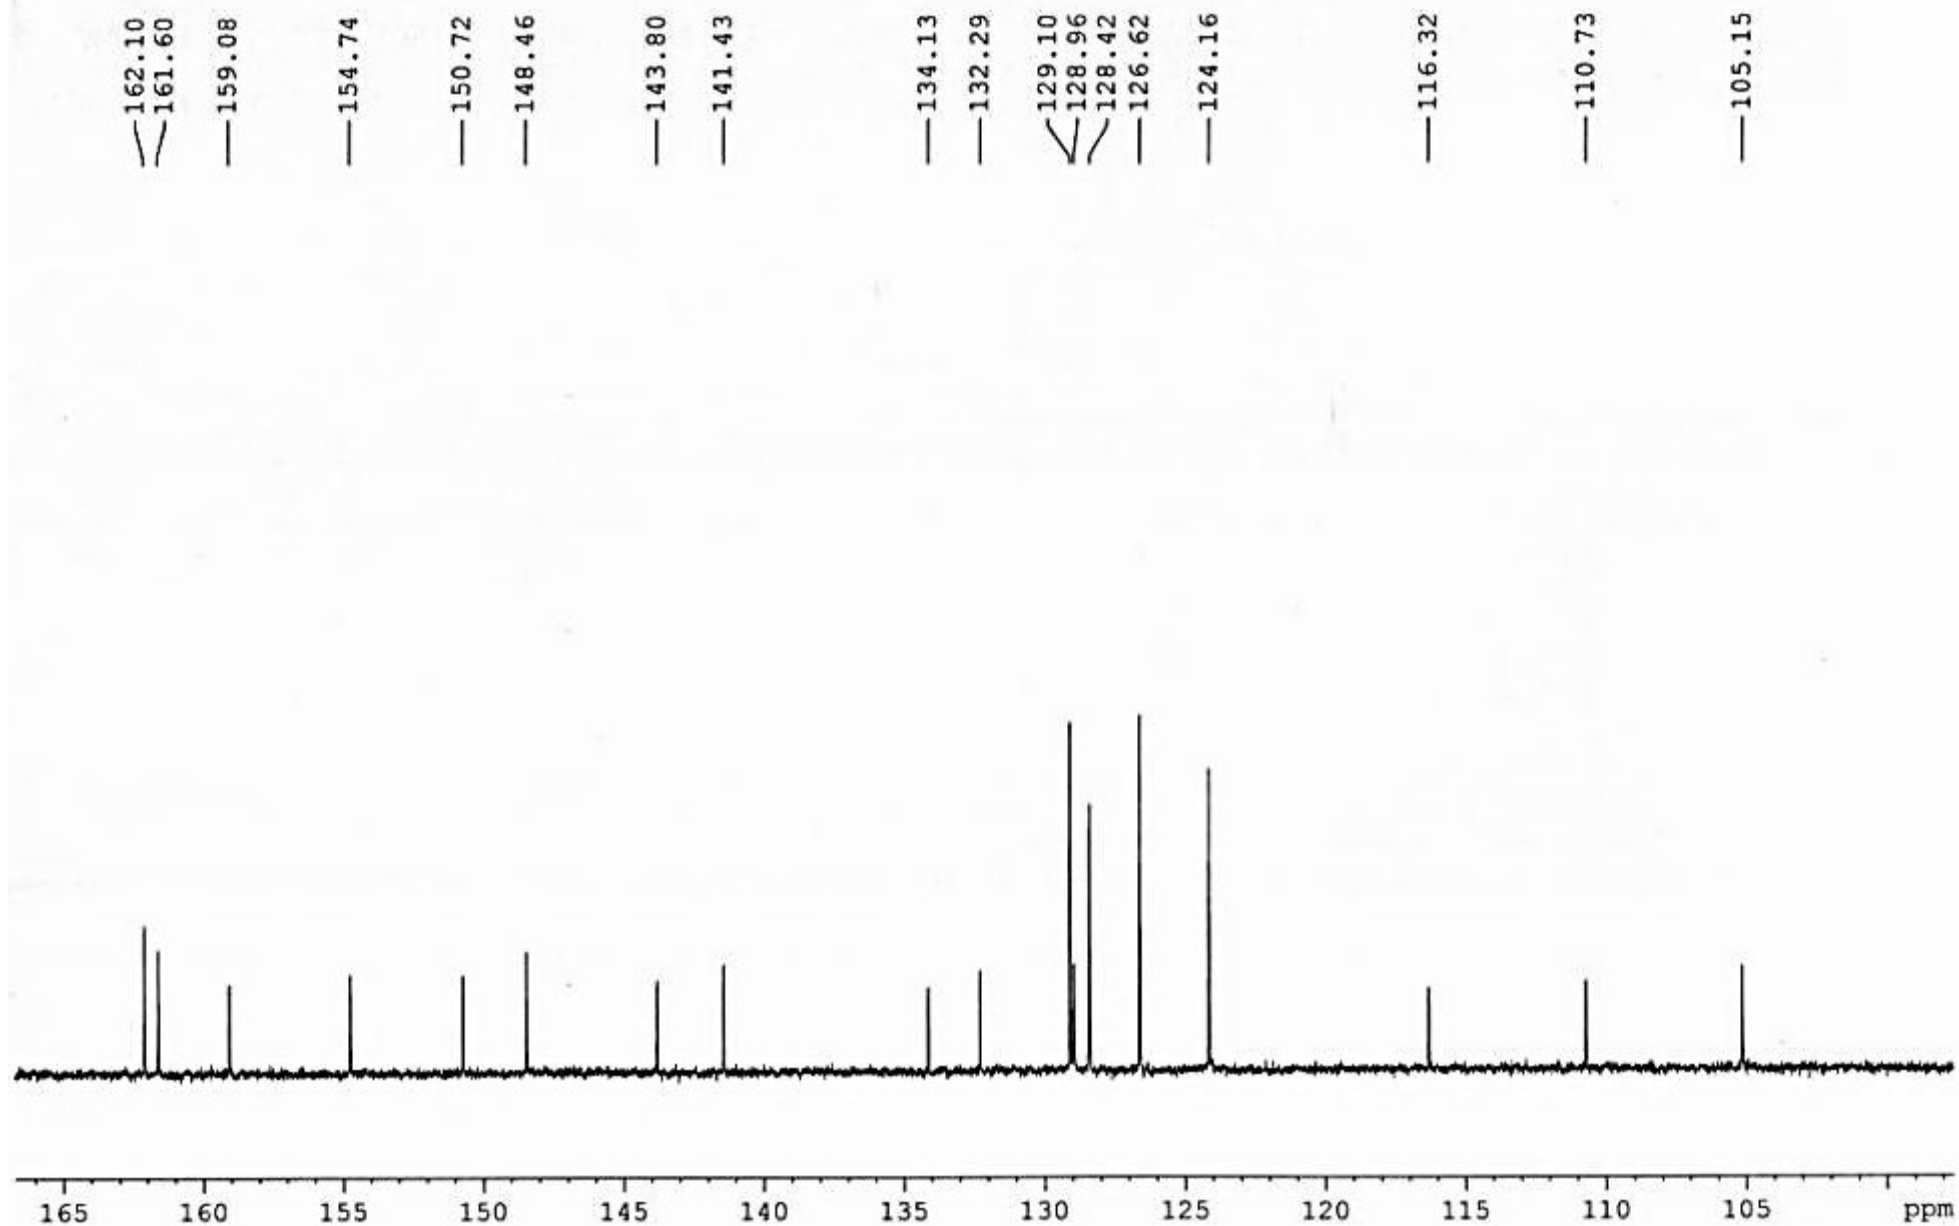

<sup>13</sup>C NMR for the compound **9f**

C:\Xcalibur\Data\saleh\MS-4NO2  
11/8/2015 9:55:46 AM

GC MS DFS- Thermo  
Project No: GS01/03

MS-4NO2

MS-4NO2 #216 RT: 9.77 AV: 1 NL: 2.03E6  
T: + c EI Full ms [ 49.50-1000.50]

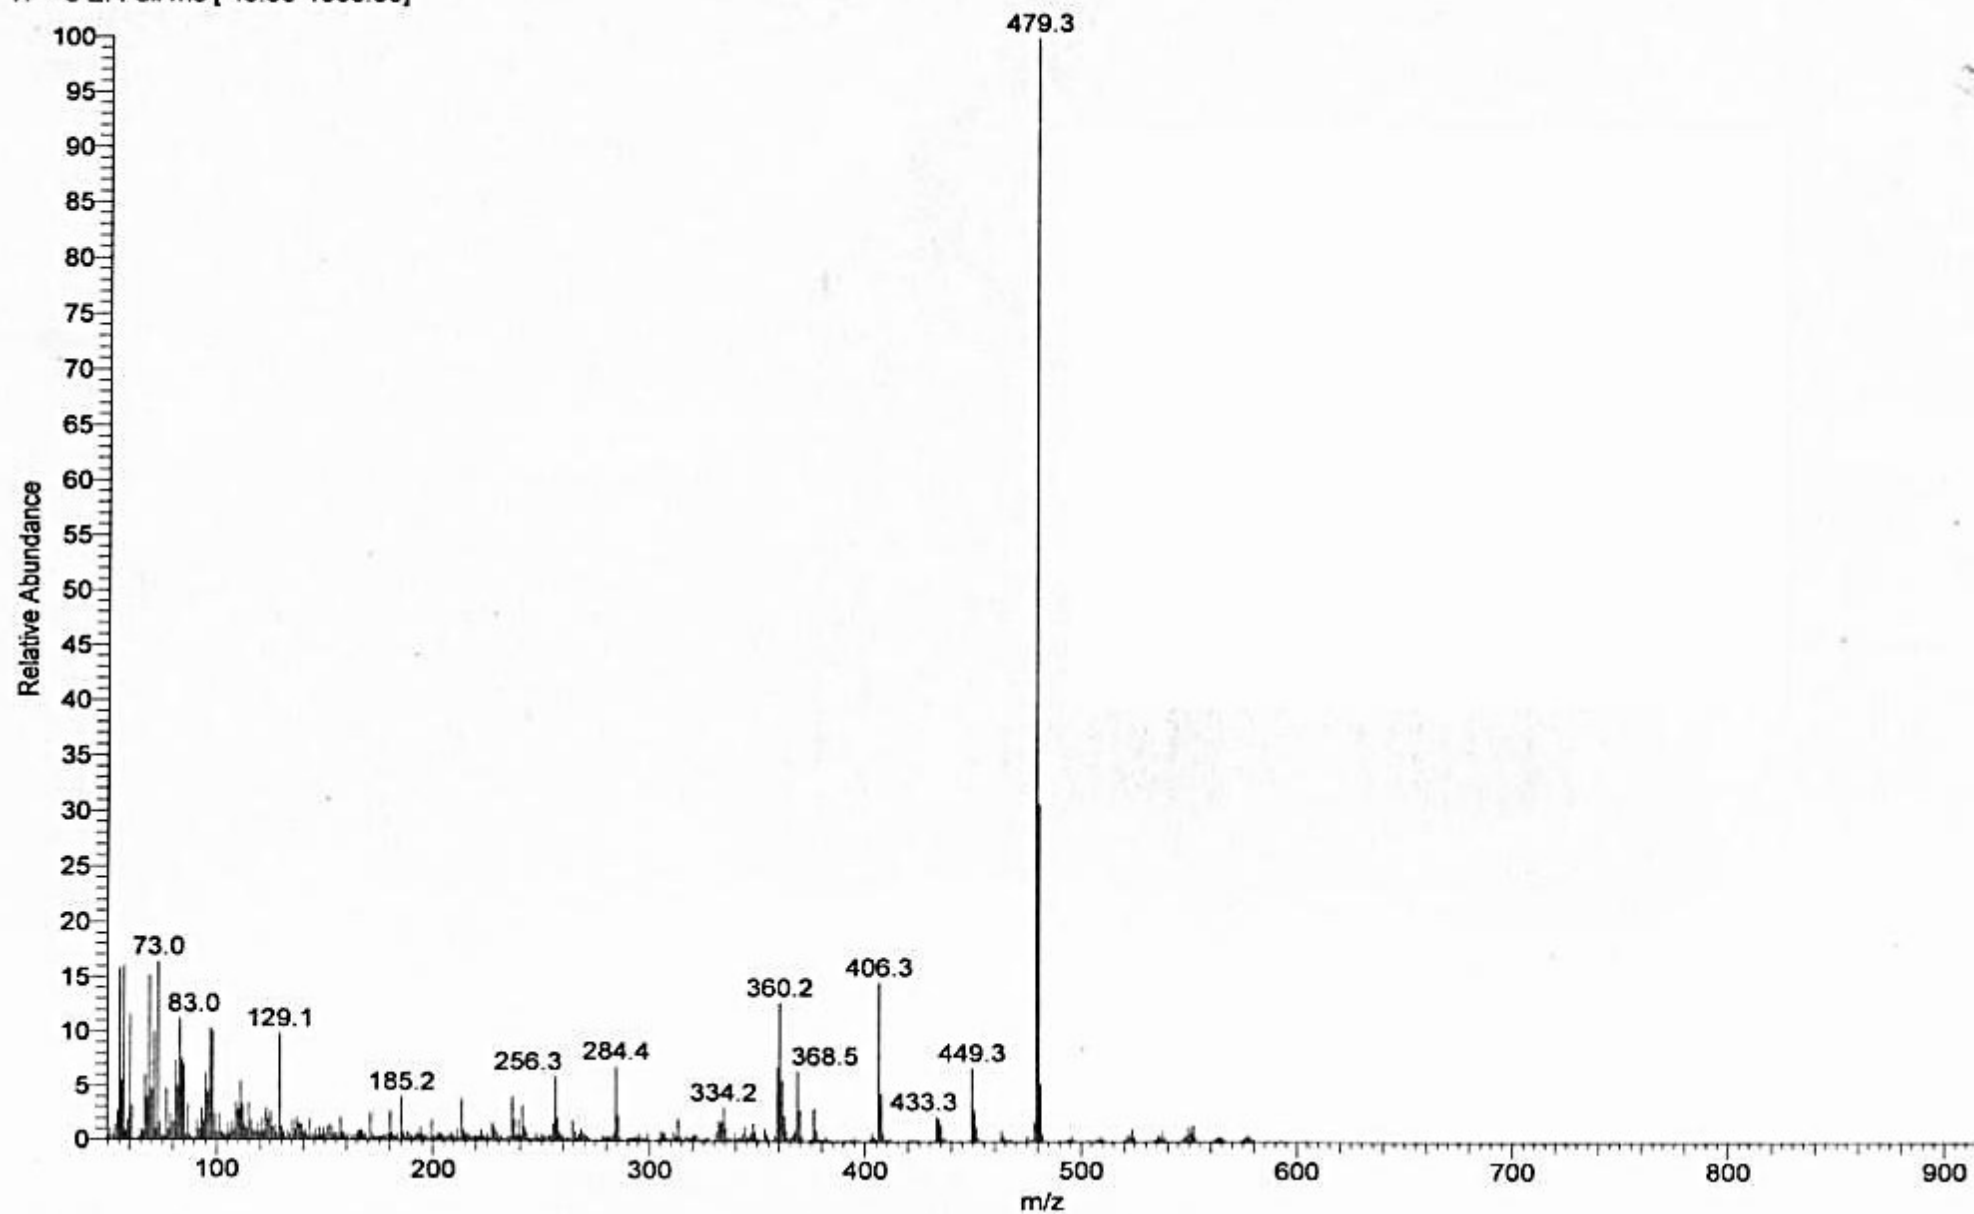

Mass spectra for the compound 9f

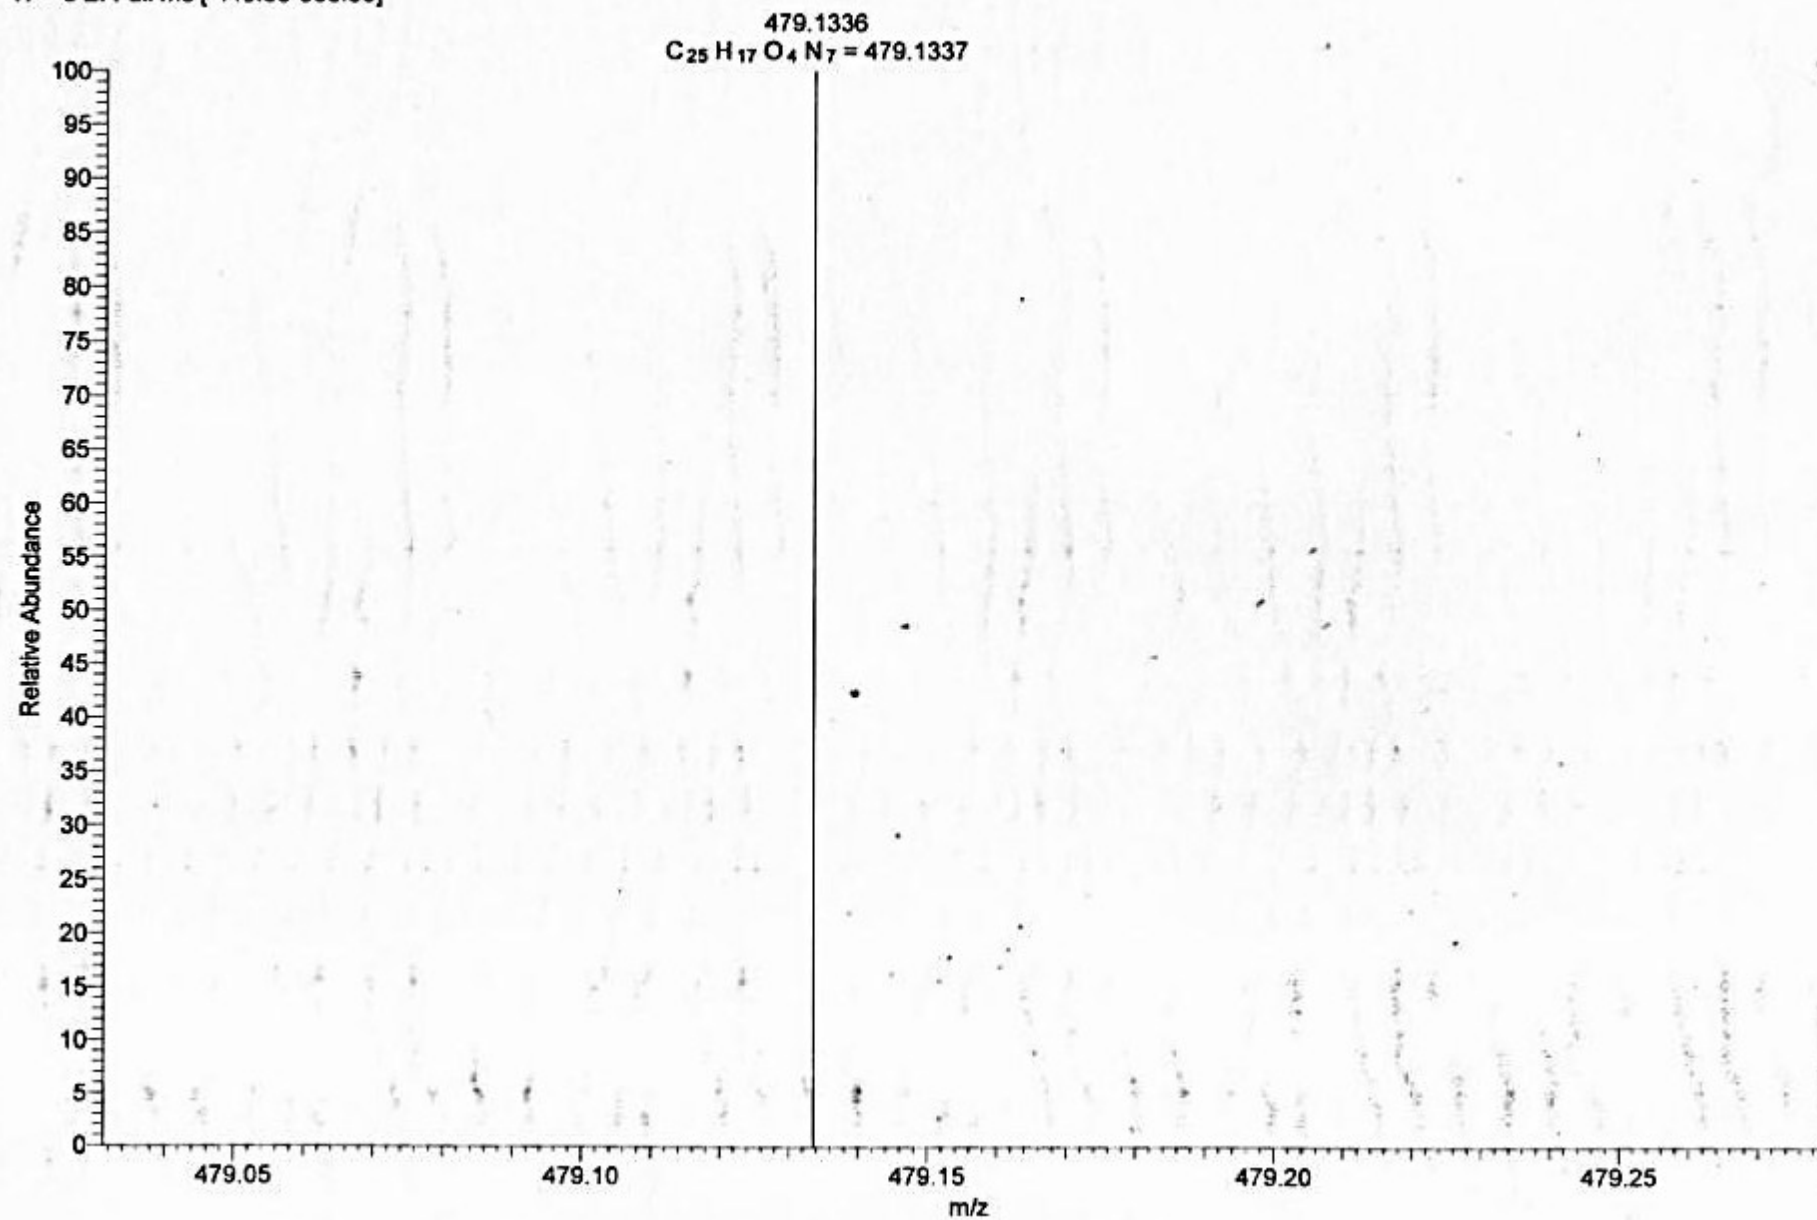

High resolution mass spectra for compound 9f

<sup>1</sup>H spectrum Moustafa MSfuran in DMSO

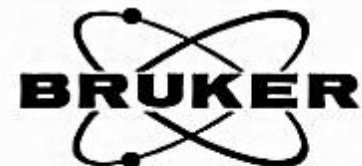

Current Data Parameters  
 NAME MSfuran-1H  
 EXPNO 1  
 PROCNO 1

F2 - Acquisition Parameters  
 Date\_ 20151202  
 Time\_ 9.52  
 INSTRUM spect  
 PROBHD 5 mm QNP 1H/13  
 PULPROG zg30  
 TD 65536  
 SOLVENT DMSO  
 NS 16  
 DS 2  
 SWH 8278.146 Hz  
 FIDRES 0.126314 Hz  
 AQ 3.9584243 sec  
 RG 181  
 DW 60.400 usec  
 DE 6.00 usec  
 TE 295.4 K  
 D1 1.0000000 sec  
 TD0 1

----- CHANNEL f1 -----  
 NUC1 1H  
 P1 10.40 usec  
 PL1 -2.00 dB  
 SFO1 400.1324710 MHz

F2 - Processing parameters  
 SI 32768  
 SF 400.1300000 MHz  
 WDW EM  
 SSB 0  
 LB 0.30 Hz  
 GB 0  
 PC 1.00

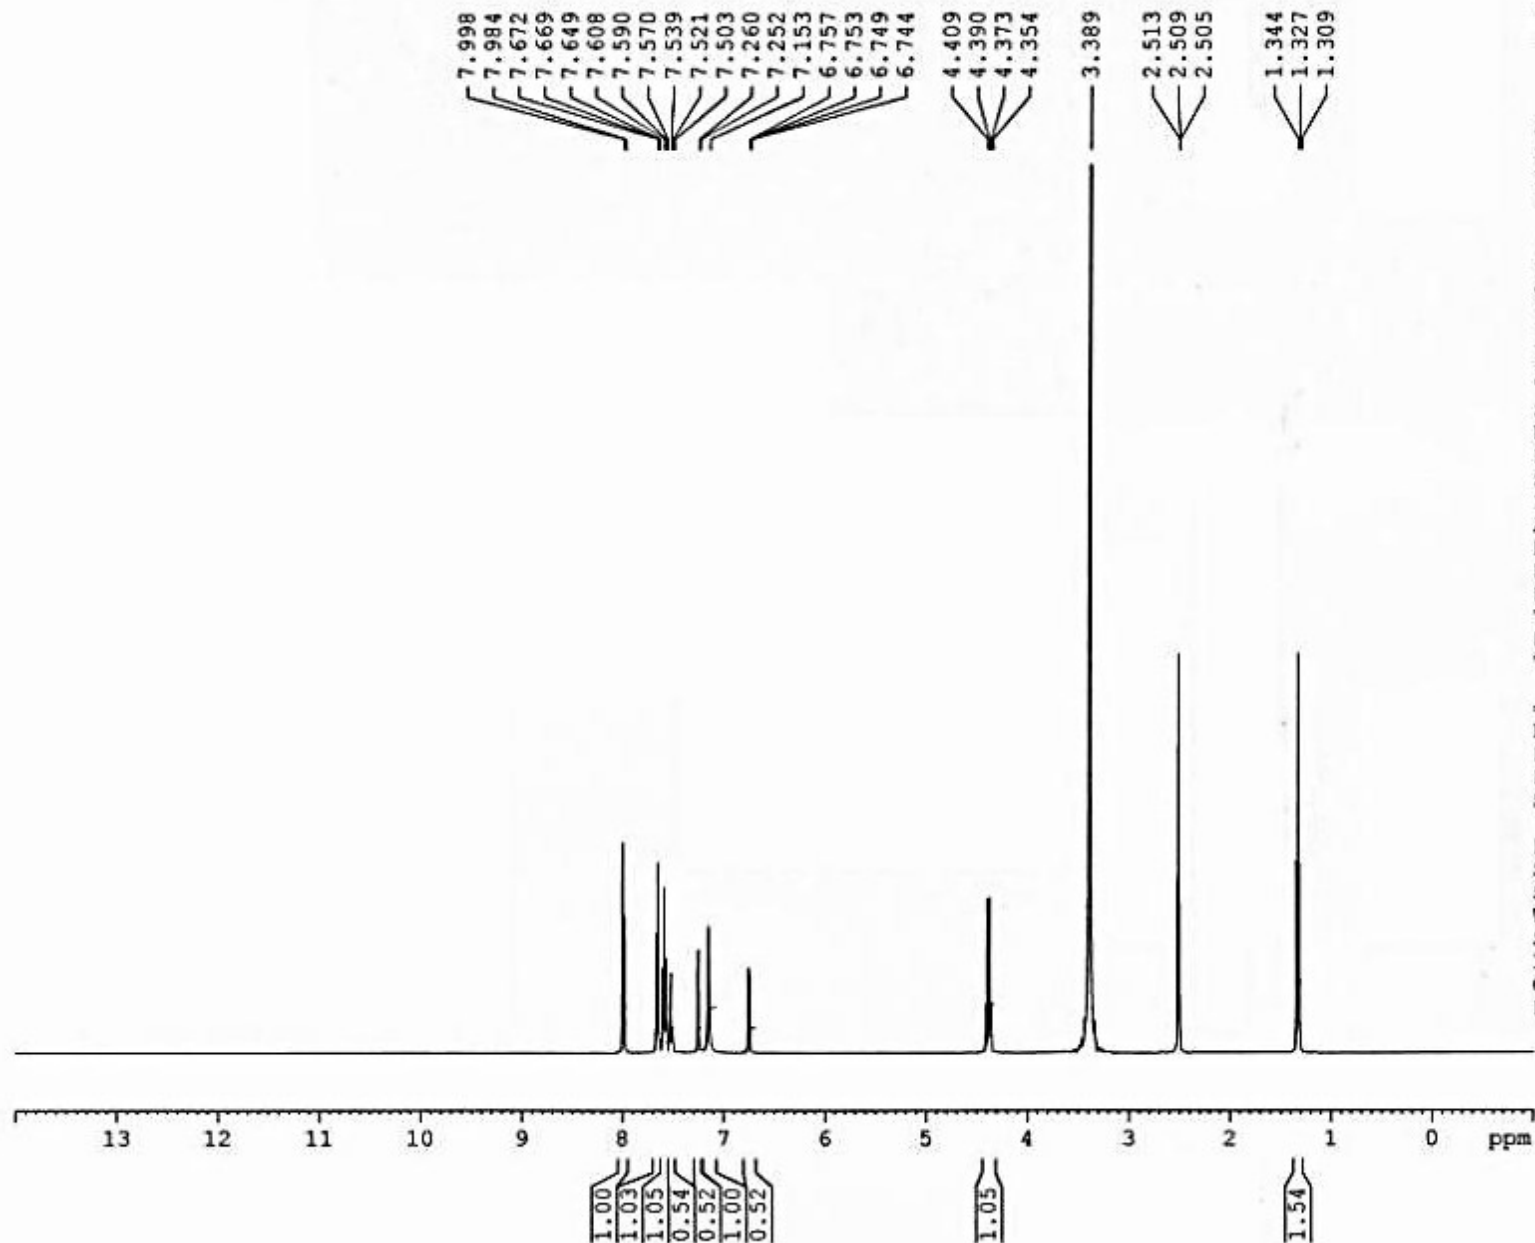

<sup>1</sup>H NMR for the compound 9g

<sup>1</sup>H spectrum Moustafa MSfuran in DMSO

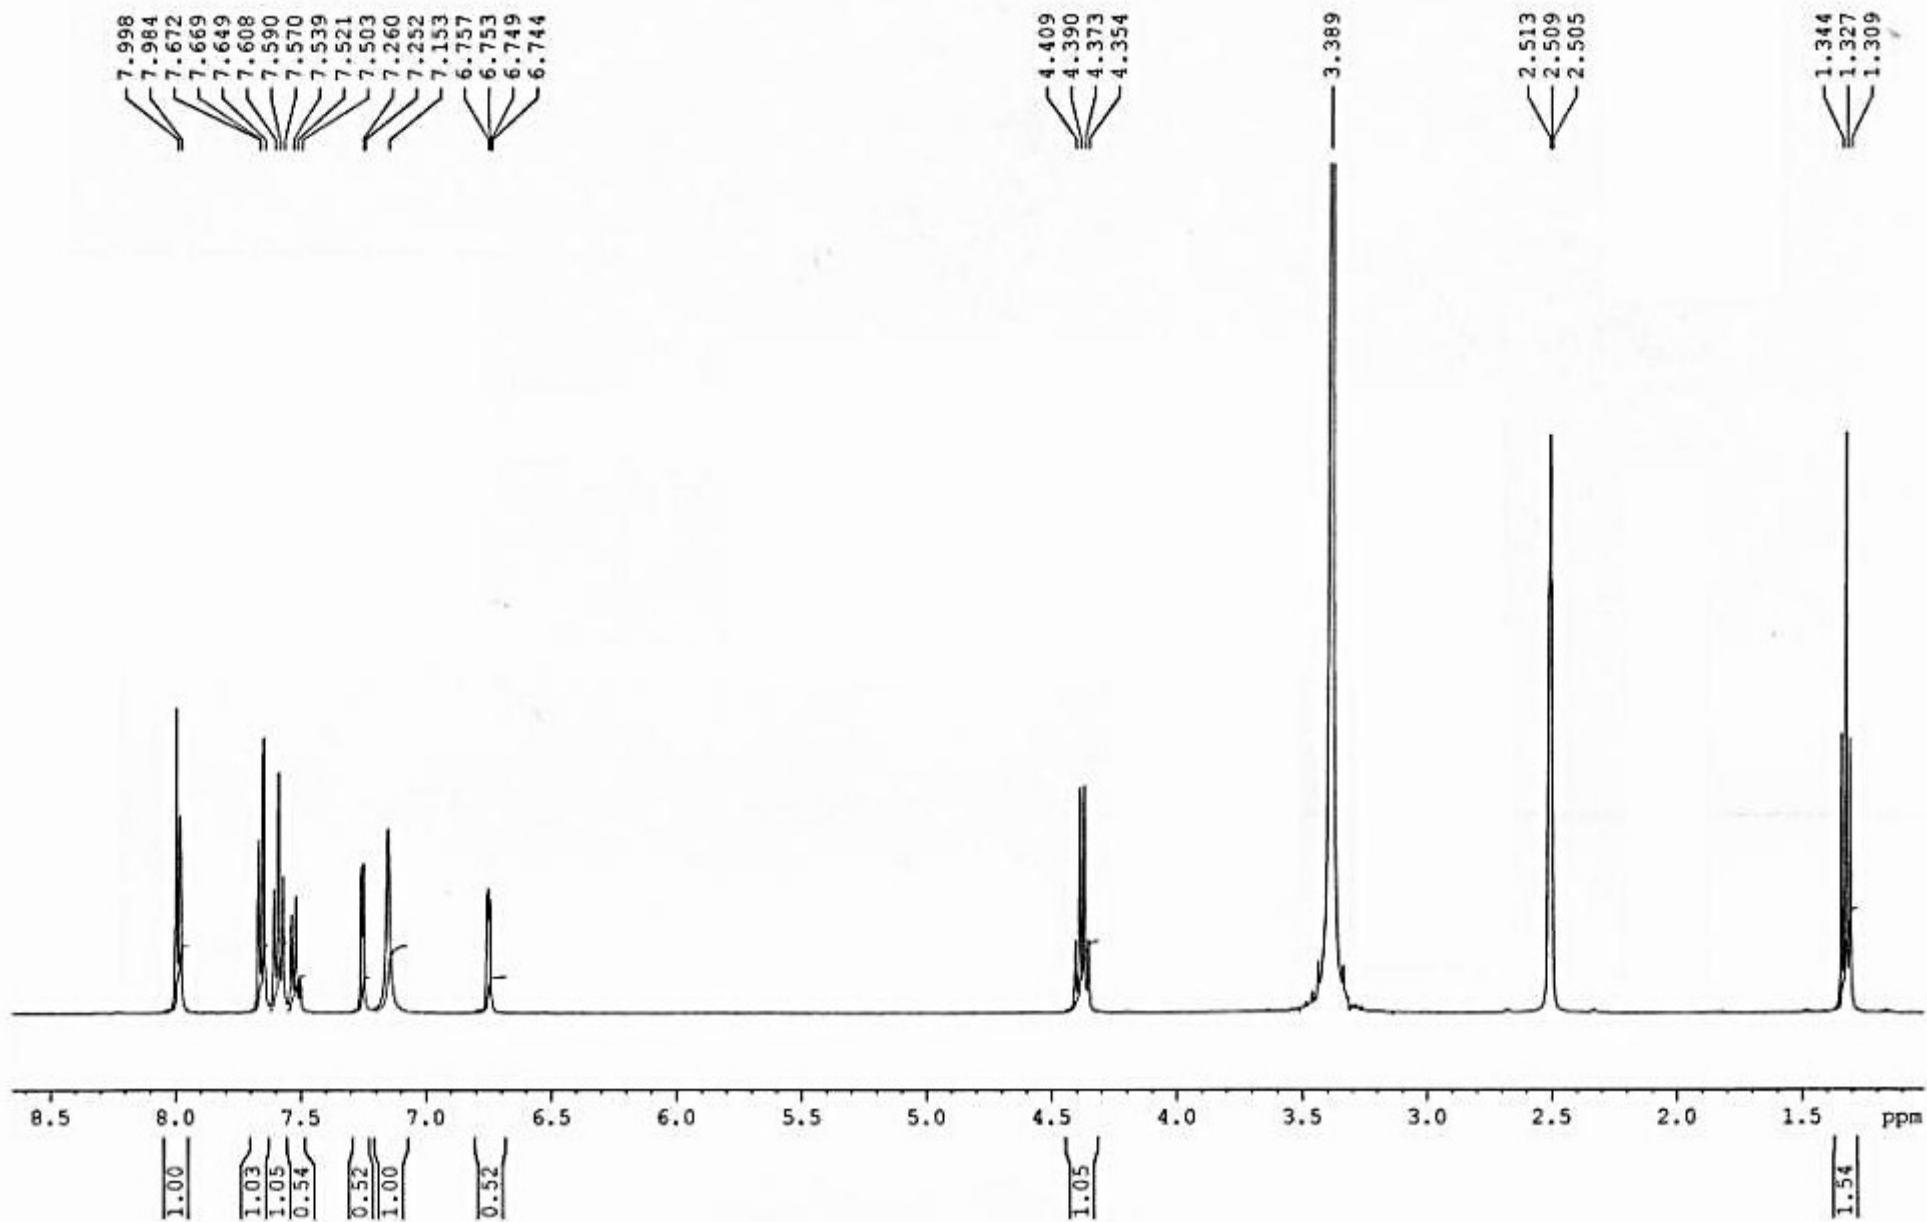

<sup>1</sup>H NMR for the compound 9g

<sup>13</sup>C decoupled spectra Mostafa Furan in DMSO

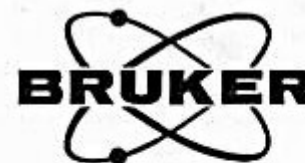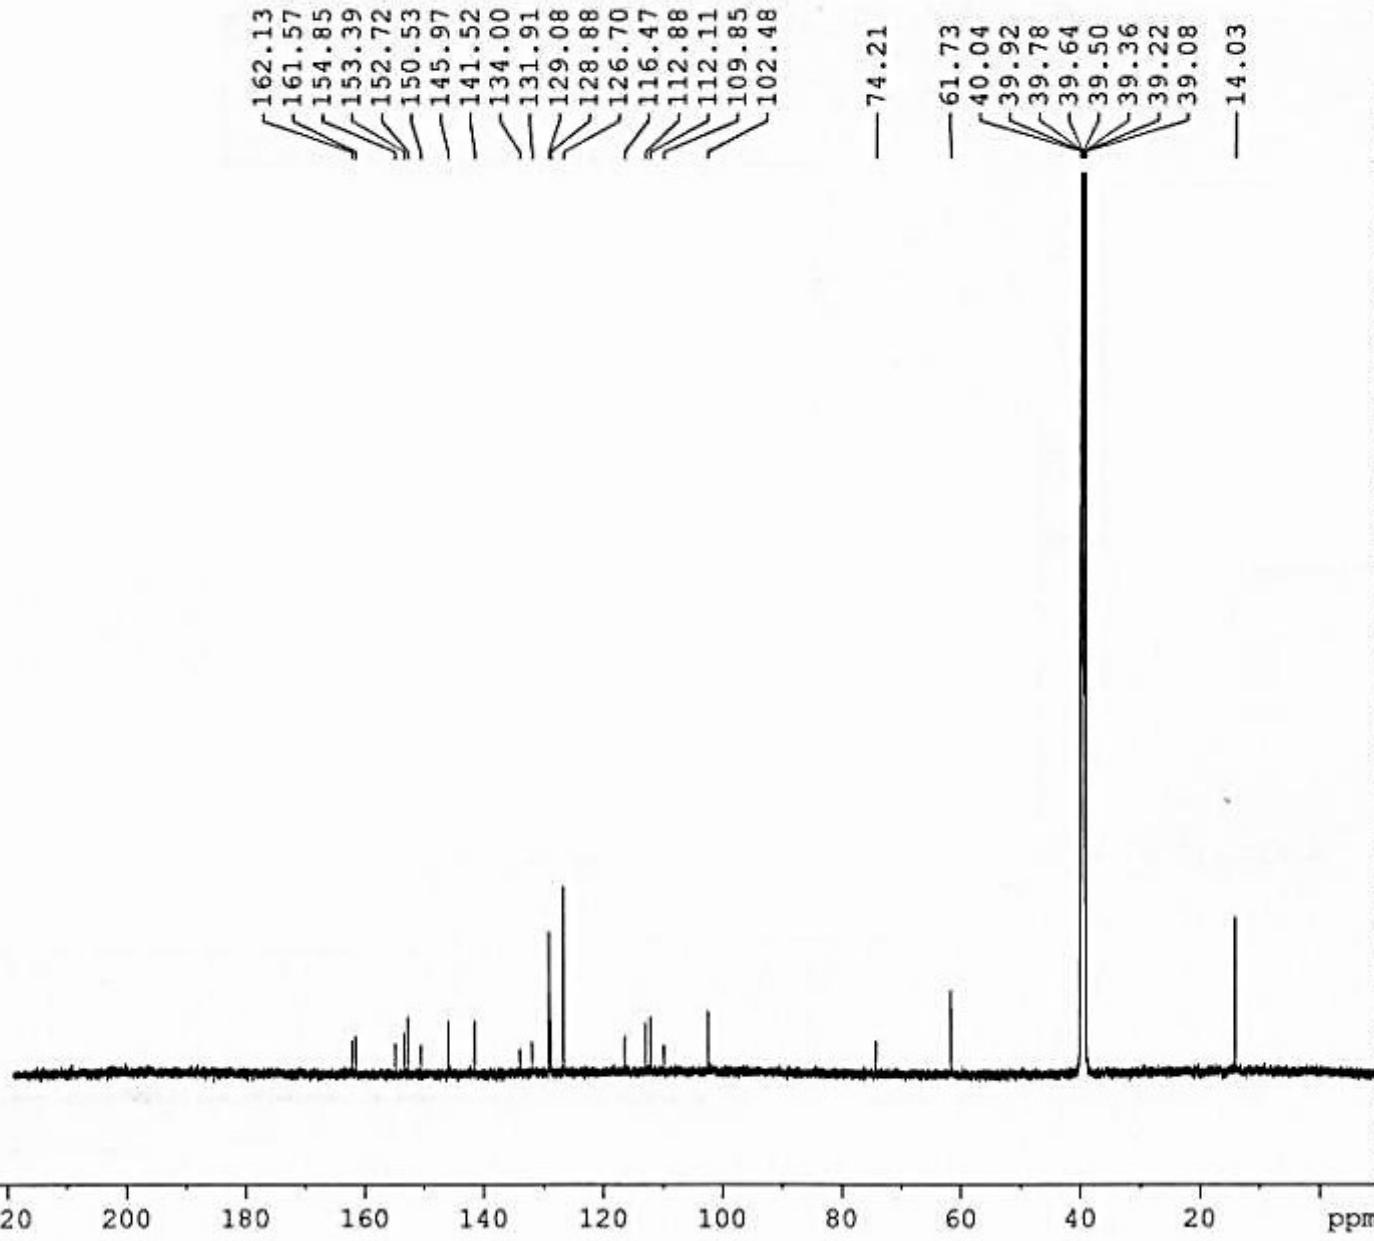

Current Data Parameters  
 NAME Furan-13C  
 EXPNO 1  
 PROCNO 1

F2 - Acquisition Parameters  
 Date\_ 20160606  
 Time\_ 22.21  
 INSTRUM spect  
 PROBHD 5 mm PABBO BB-  
 PULPROG zgpg30  
 TD 65536  
 SOLVENT DMSO  
 NS 10240  
 DS 4  
 SWH 36057.691 Hz  
 FIDRES 0.550197 Hz  
 AQ 0.9087659 sec  
 RG 203  
 DW 13.867 usec  
 DE 50.00 usec  
 TE 298.0 K  
 D1 2.00000000 sec  
 D11 0.03000000 sec  
 TD0 1

===== CHANNEL f1 =====  
 SFO1 150.9178979 MHz  
 NUC1 13C  
 P1 8.80 usec  
 PLW1 78.13500214 W

===== CHANNEL f2 =====  
 SFO2 600.1324005 MHz  
 NUC2 1H  
 CPDPRG[2] waltz65  
 PCPD2 70.00 usec  
 PLW2 27.82500076 W  
 PLW12 0.63804001 W  
 PLW13 0.31264001 W

F2 - Processing parameters  
 SI 32768  
 SF 150.9028827 MHz  
 WDW EM  
 SSB 0  
 LB 1.00 Hz  
 GB 0  
 PC 1.40

<sup>13</sup>C NMR for the compound 9g

<sup>13</sup>C decoupled spectra Mostafa Furan in DMSO

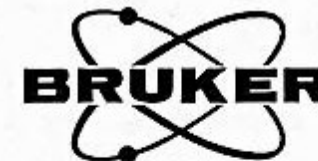

162.13  
161.57  
154.85  
153.39  
152.72  
150.53  
145.97  
141.52  
134.00  
131.91  
129.08  
128.88  
126.70  
116.47  
112.88  
112.11  
109.85  
102.48

Current Data Parameters  
NAME Furan-13C  
EXPNO 1  
PROCNO 1

F2 - Acquisition Parameters  
Date\_ 20160606  
Time\_ 22.21  
INSTRUM spect  
PROBHD 5 mm PABBO BB-  
PULPROG zgpg30  
TD 65536  
SOLVENT DMSO  
NS 10240  
DS 4  
SWH 36057.691 Hz  
FIDRES 0.550197 Hz  
AQ 0.9087659 sec  
RG 203  
DW 13.867 usec  
DE 50.00 usec  
TE 298.0 K  
D1 2.00000000 sec  
D11 0.03000000 sec  
TD0 1

==== CHANNEL f1 =====  
SFO1 150.9178979 MHz  
NUC1 13C  
P1 8.80 usec  
PLW1 78.13500214 W

==== CHANNEL f2 =====  
SFO2 600.1324005 MHz  
NUC2 1H  
CPDPRG[2] waltz65  
PCPD2 70.00 usec  
PLW2 27.82500076 W  
PLW12 0.63804001 W  
PLW13 0.31264001 W

F2 - Processing parameters  
SI 32768  
SF 150.9028827 MHz  
WDW EM  
SSB 0  
LB 1.00 Hz  
GB 0  
PC 1.40

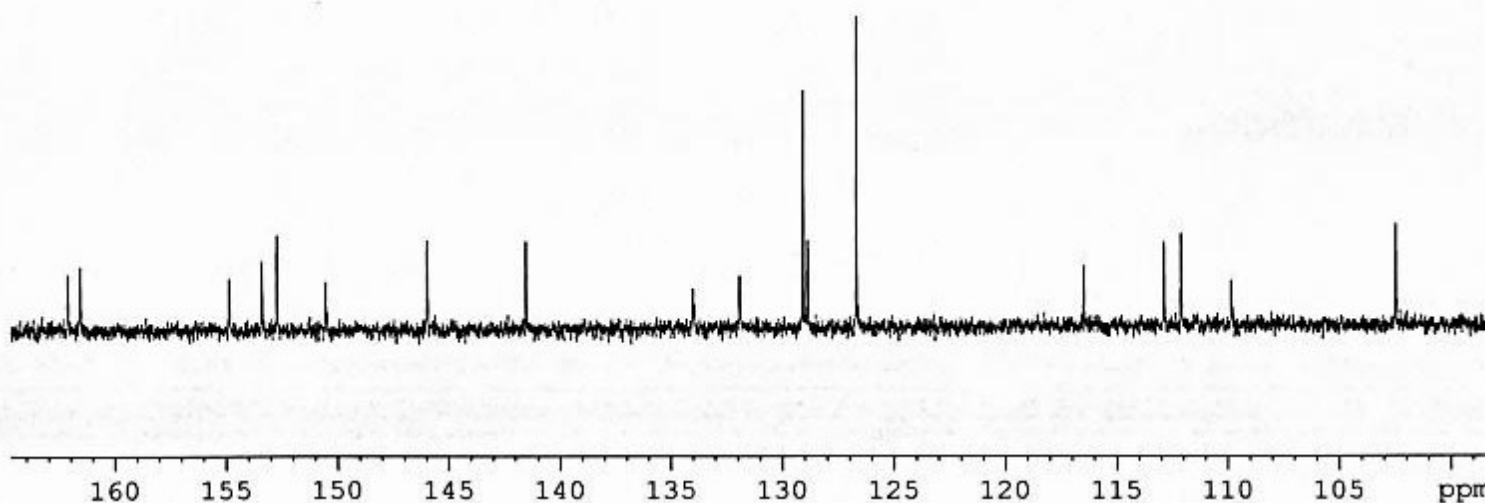

<sup>13</sup>C NMR for the compound 9g



C:\Xcalibur\Data\saleh\MS-Furan

11/4/2015 2:34:08 PM

MS-Furan #183 RT: 7.58 AV: 1 NL: 4.76E6

T: + c EI Full ms [ 49.50-1000.50]

GC MS DFS- Thermo

Project No: GS01/03

MS-Furan

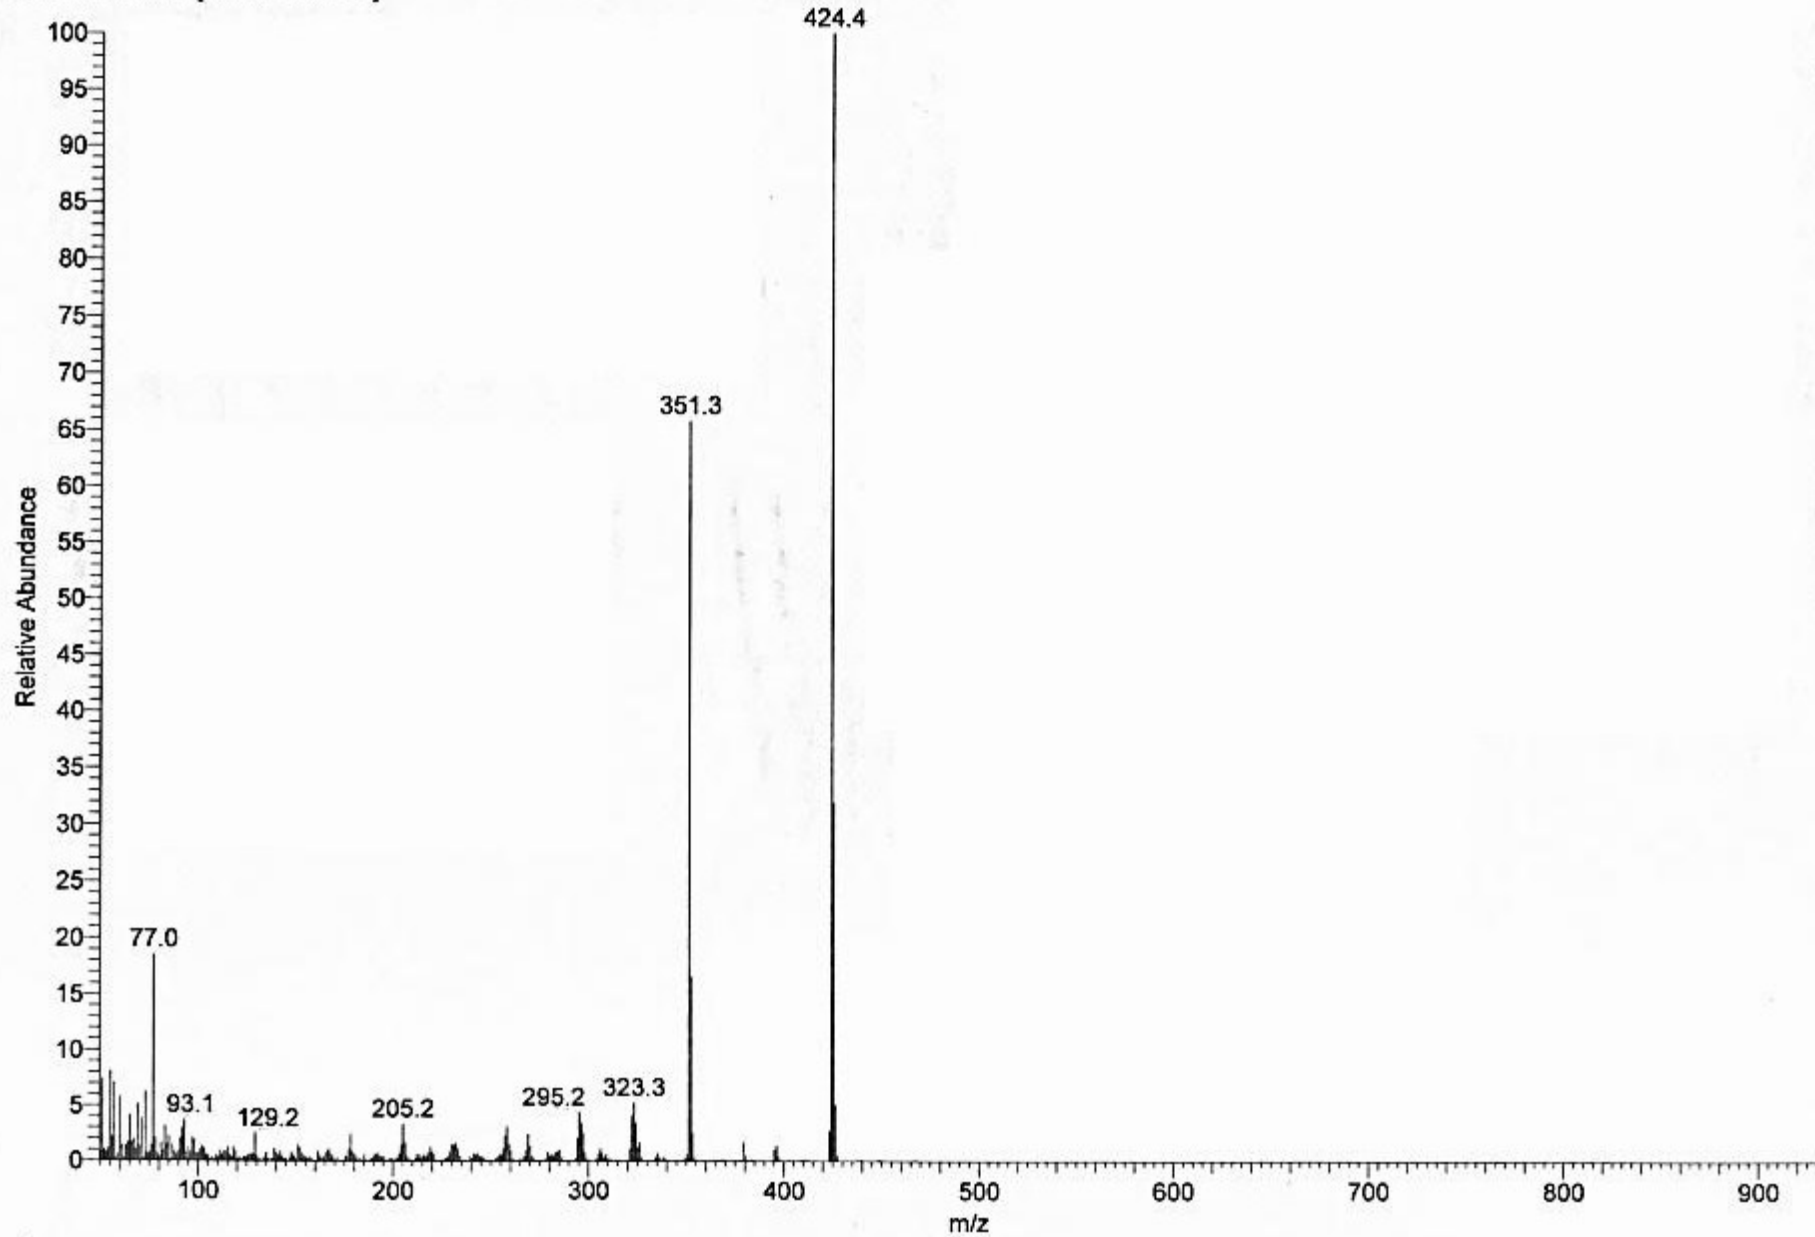

Mass spectra for the compound **9g**

C:\Xcalibur\Data\saleh\HRMS-MSfuran-c1  
11/25/2015 9:04:14 AM

GC MS DFS- Thermo  
Project No: GS01/03

HRMS-MSfuran-c1 #36 RT: 8.43 AV: 1 NL: 2.14E5  
T: + c EI Full ms [ 399.50-460.50]

424.1278  
 $C_{23}H_{16}O_3N_6 = 424.1278$

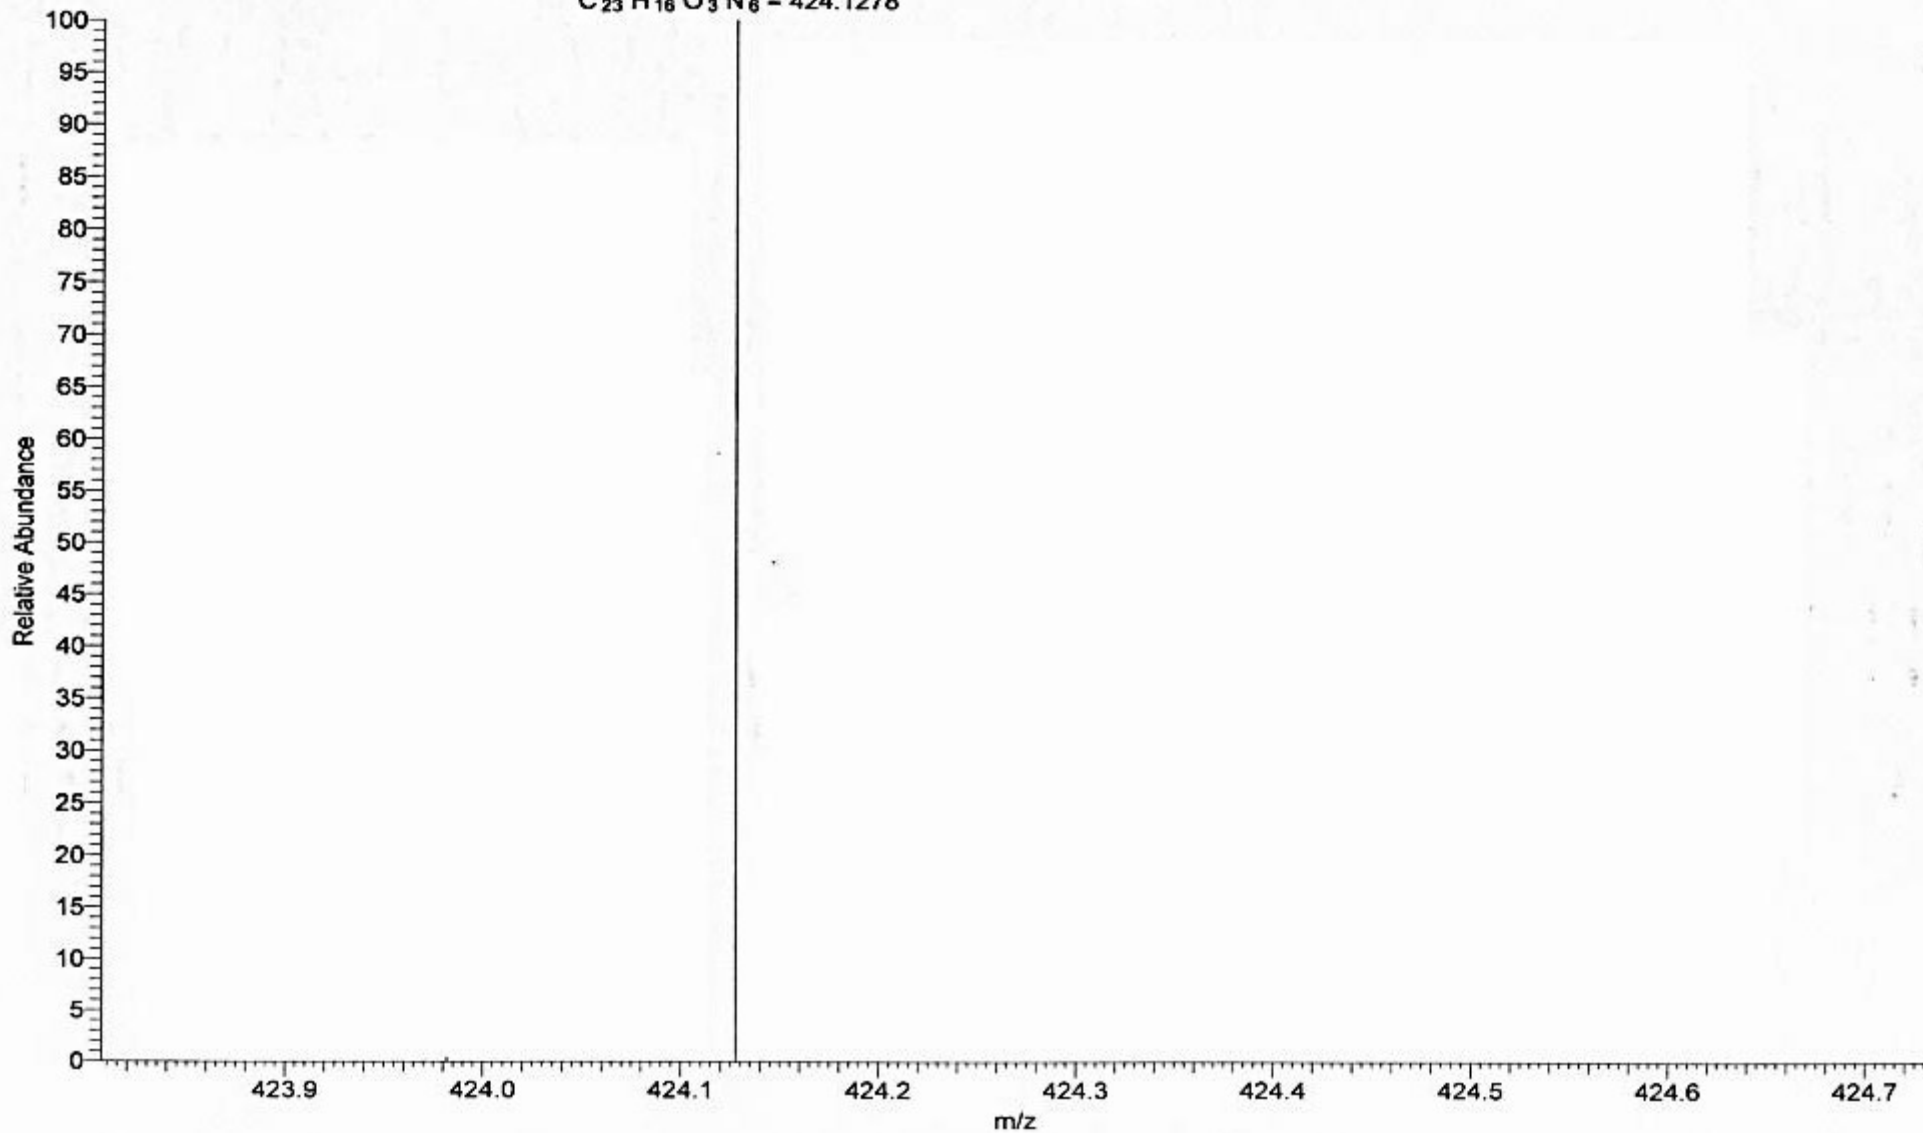

High resolution mass spectra for compound **9g**

<sup>1</sup>H spectra Mostafa MS pyridine in DMSO

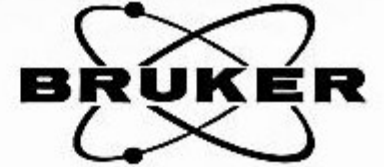

8.563  
8.207  
8.185  
8.151  
7.974  
7.969  
7.957  
7.952  
7.746  
7.741  
7.729  
7.724  
7.678  
7.675  
7.656  
7.615  
7.596  
7.577  
7.545  
7.527  
7.509  
7.243  
4.439  
4.421  
4.403  
4.386  
3.342  
2.518  
2.513  
2.509  
2.505  
2.500  
1.359  
1.341  
1.324

Current Data Parameters  
NAME Ms 4C1  
EXPNO 1  
PROCNO 1

F2 - Acquisition Parameters  
Date\_ 20151203  
Time\_ 19.58  
INSTRUM spect  
PROBHD 5 mm QNP 1H/13  
PULPROG zg30  
TD 65536  
SOLVENT DMSO  
NS 16  
DS 2  
SWH 8278.146 Hz  
FIDRES 0.126314 Hz  
AQ 3.9584243 sec  
RG 574.7  
DW 60.400 usec  
DE 6.00 usec  
TE 295.4 K  
D1 1.00000000 sec  
TD0 1

----- CHANNEL f1 -----  
NUC1 1H  
P1 10.40 usec  
PL1 -2.00 dB  
SFO1 400.1324710 MHz

F2 - Processing parameters  
SI 32768  
SF 400.1300000 MHz  
WDW EM  
SSB 0  
LB 0.30 Hz  
GB 0  
PC 1.00

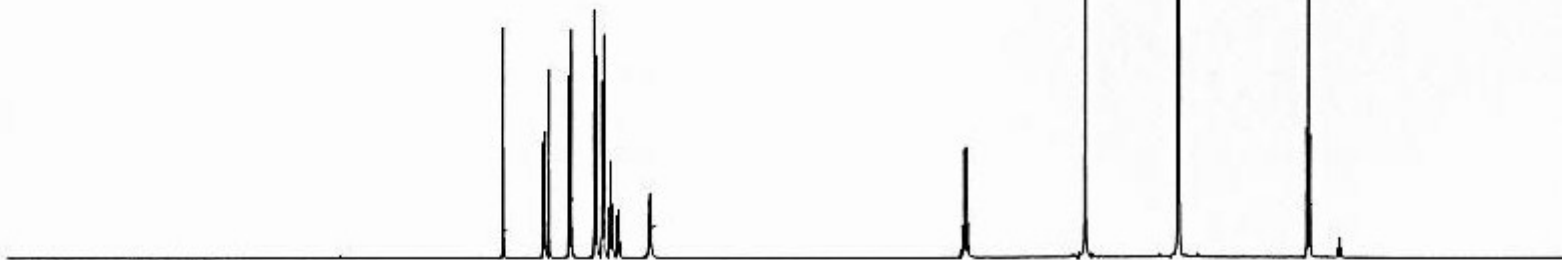

12 11 10 9 8 7 6 5 4 3 2 1 0 ppm

0.83  
1.00  
0.51  
1.71  
1.70  
2.02  
1.02  
0.52  
0.96

1.02

1.50

$^1\text{H}$  spectra Mostafa MS pyridine in DMSO

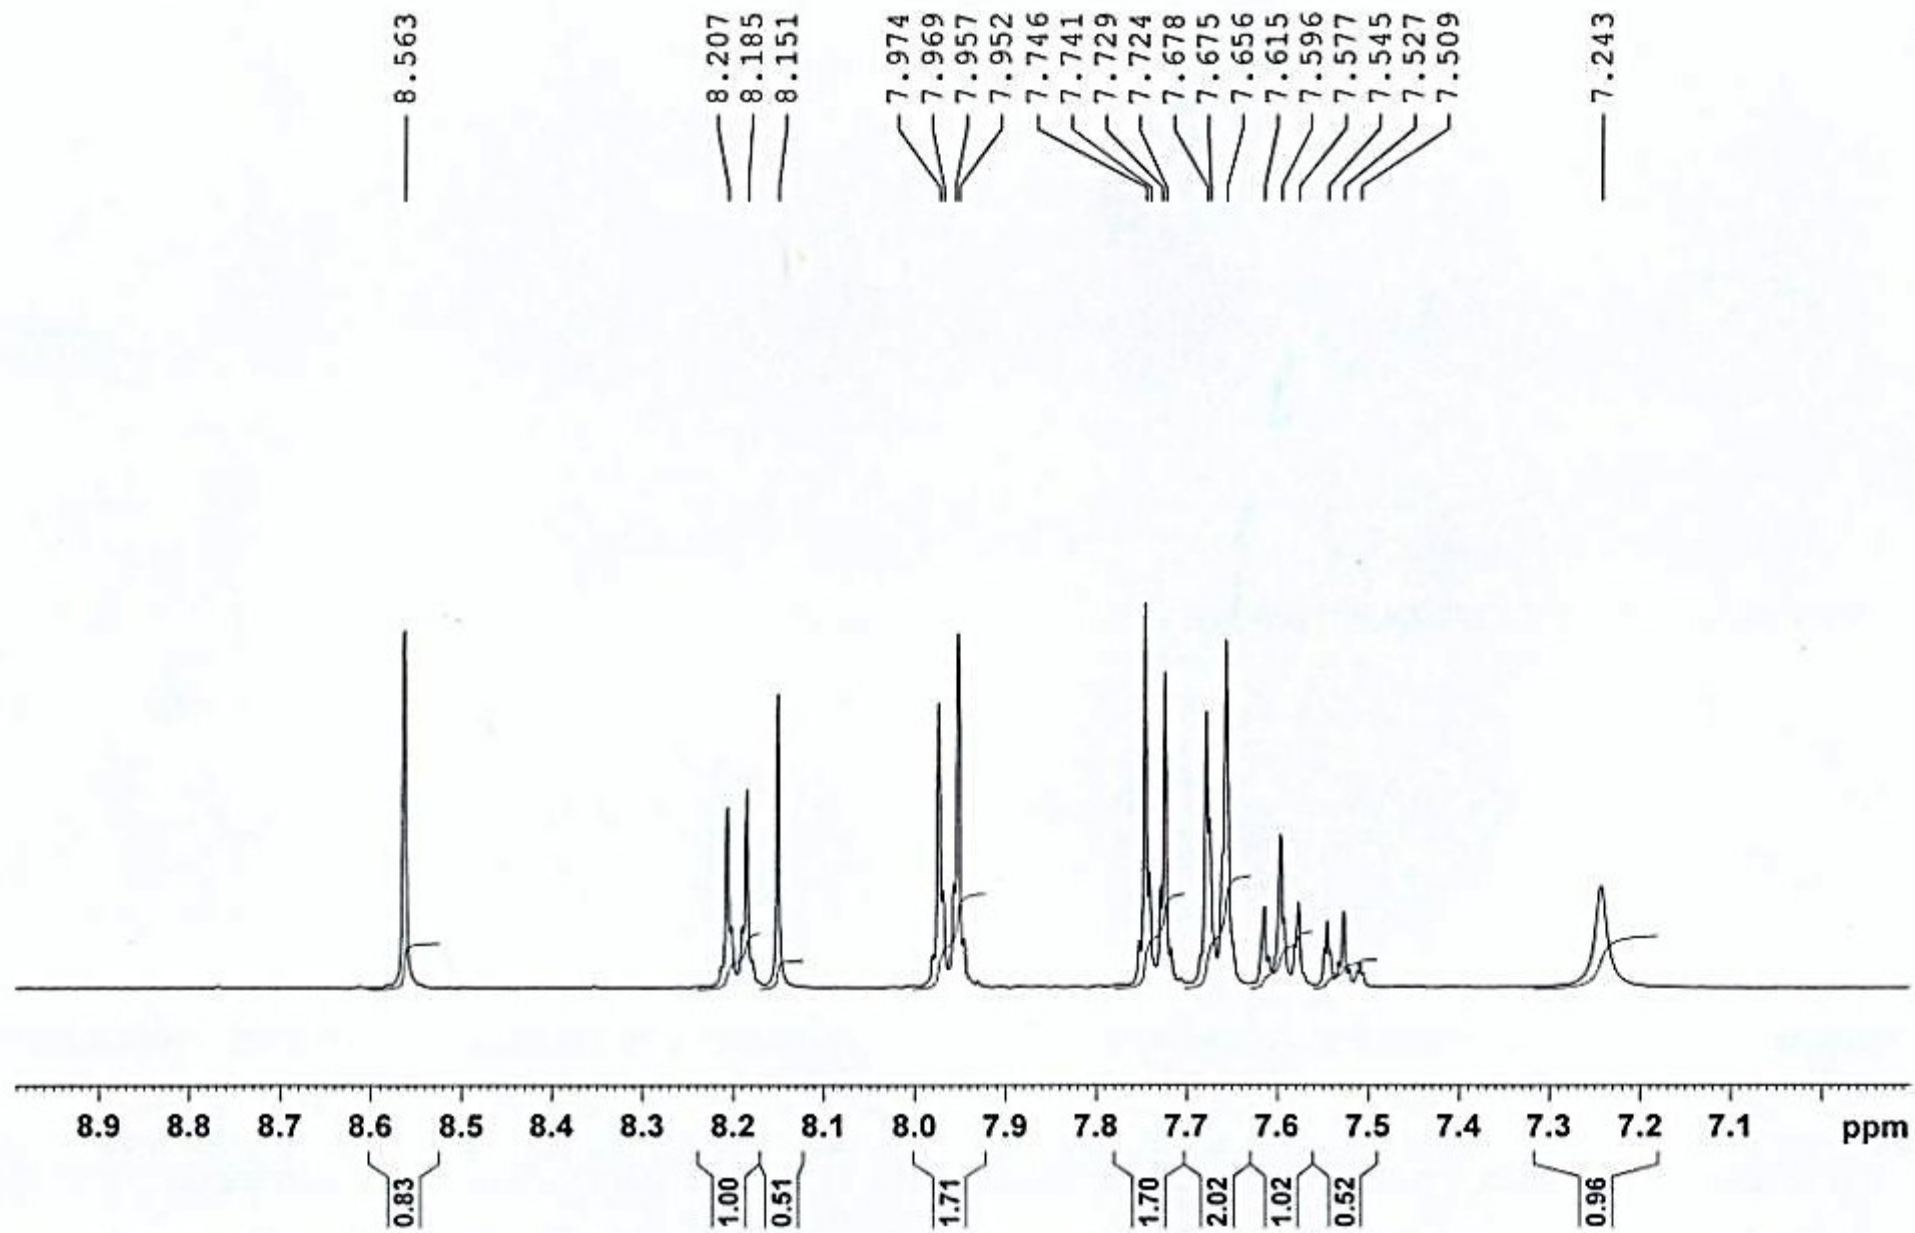

$^1\text{H}$  NMR for the compound 9h

<sup>13</sup>C decoupled spectra Mostafa MS pyridine in DMSO

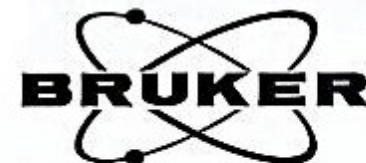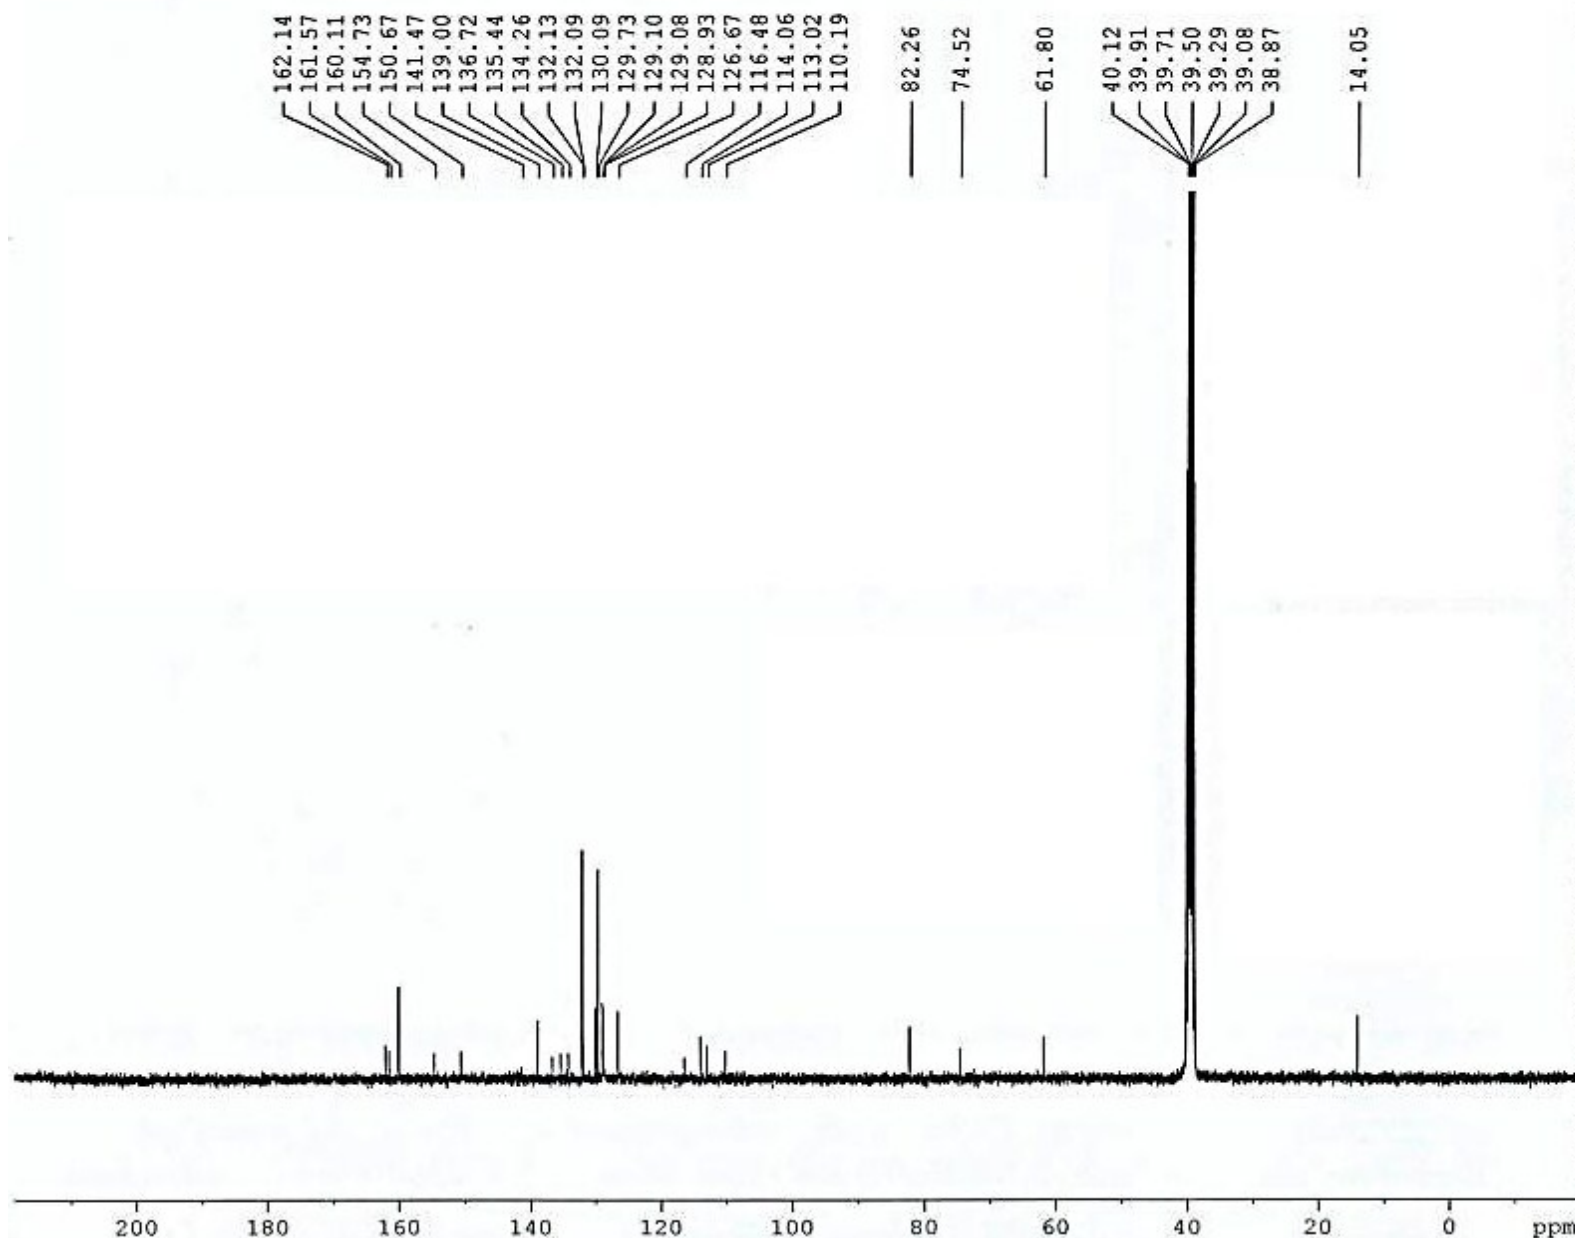

162.14  
161.57  
160.11  
154.73  
150.67  
141.47  
139.00  
136.72  
135.44  
134.26  
132.13  
132.09  
130.09  
129.73  
129.10  
129.08  
128.93  
126.67  
116.48  
114.06  
113.02  
110.19

82.26  
74.52  
61.80

40.12  
39.91  
39.71  
39.50  
39.29  
39.08  
38.87

14.05

Current Data Parameters  
NAME Ms 4C1  
EXPNO 2  
PROCNO 1

F2 - Acquisition Parameters  
Date\_ 20151204  
Time\_ 0.54  
INSTRUM spect  
PROBHD 5 mm QNP 1H/13  
PULPROG zgpg30  
TD 65536  
SOLVENT DMSO  
NS 5120  
DS 4  
SWH 23980.814 Hz  
FIDRES 0.365918 Hz  
AQ 1.3664756 sec  
RG 11585.2  
DW 20.850 usec  
DE 6.00 usec  
TE 295.9 K  
D1 2.00000000 sec  
d11 0.03000000 sec  
DELTA 1.89999998 sec  
TD0 1

===== CHANNEL f1 =====  
NUC1 13C  
P1 7.00 usec  
PL1 -6.00 dB  
SFO1 100.6228298 MHz

===== CHANNEL f2 =====  
CPDPRG2 waltz16  
NUC2 1H  
PCPD2 80.00 usec  
PL2 -2.00 dB  
PL12 15.50 dB  
PL13 18.50 dB  
SFO2 400.1316005 MHz

F2 - Processing parameters  
SI 32768  
SF 100.6128179 MHz  
WDW EM  
SSB 0  
LB 1.00 Hz  
GB 0  
PC 1.40

<sup>13</sup>C NMR for the compound 9h

<sup>13</sup>C decoupled spectra Mostafa MS pyridine in DMSO

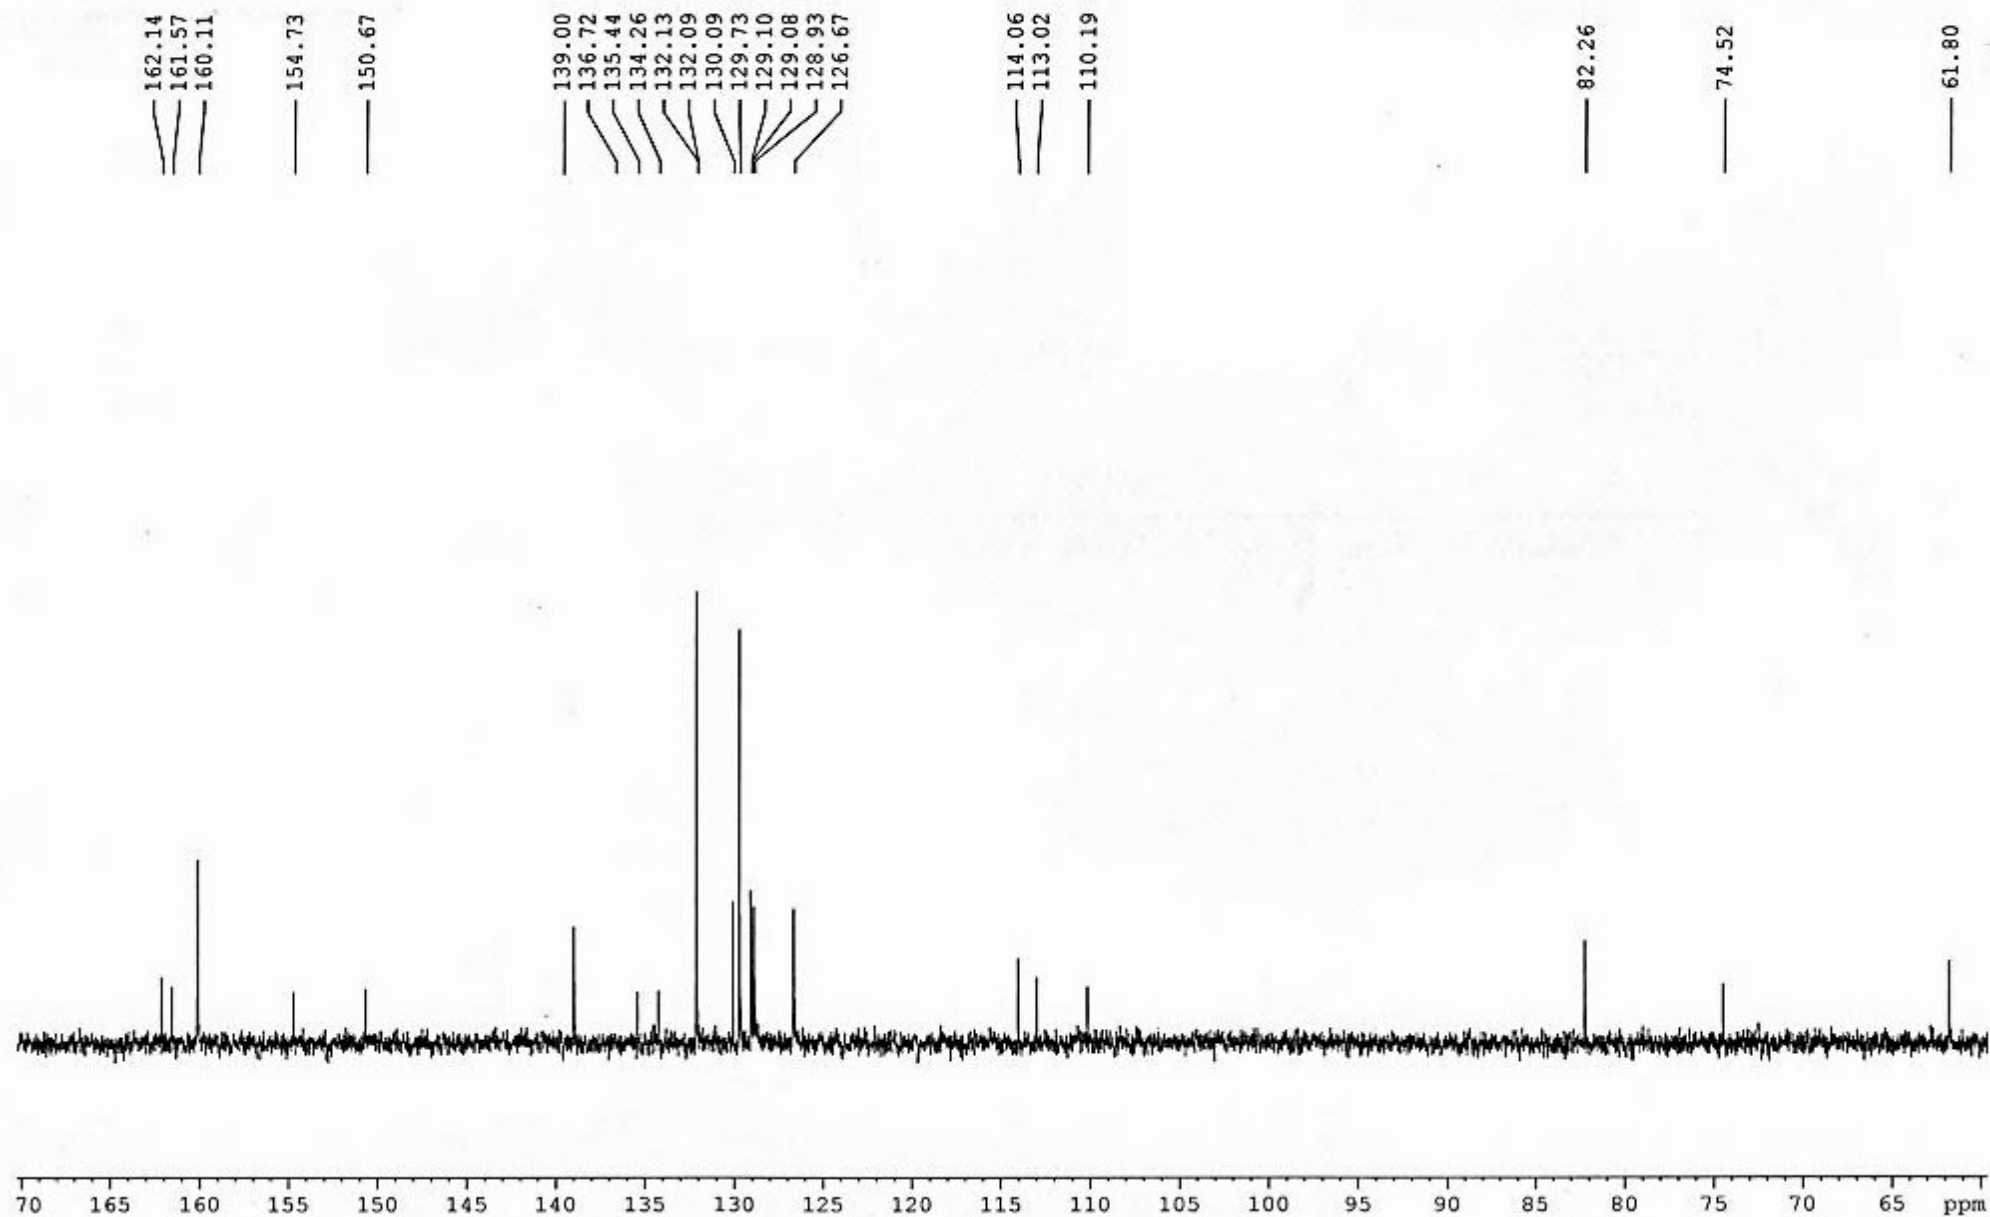

<sup>13</sup>C NMR for the compound **9h**

C:\Xcalibur\Data\saleh\MS-Pyridin  
11/8/2015 9:33:07 AM

GC MS DFS- Thermo  
Project No: GS01/03

MS-Pyridin

MS-Pyridin #262 RT: 11.94 AV: 1 NL: 5.50E7  
T: + c EI Full ms [ 49.50-1000.50]

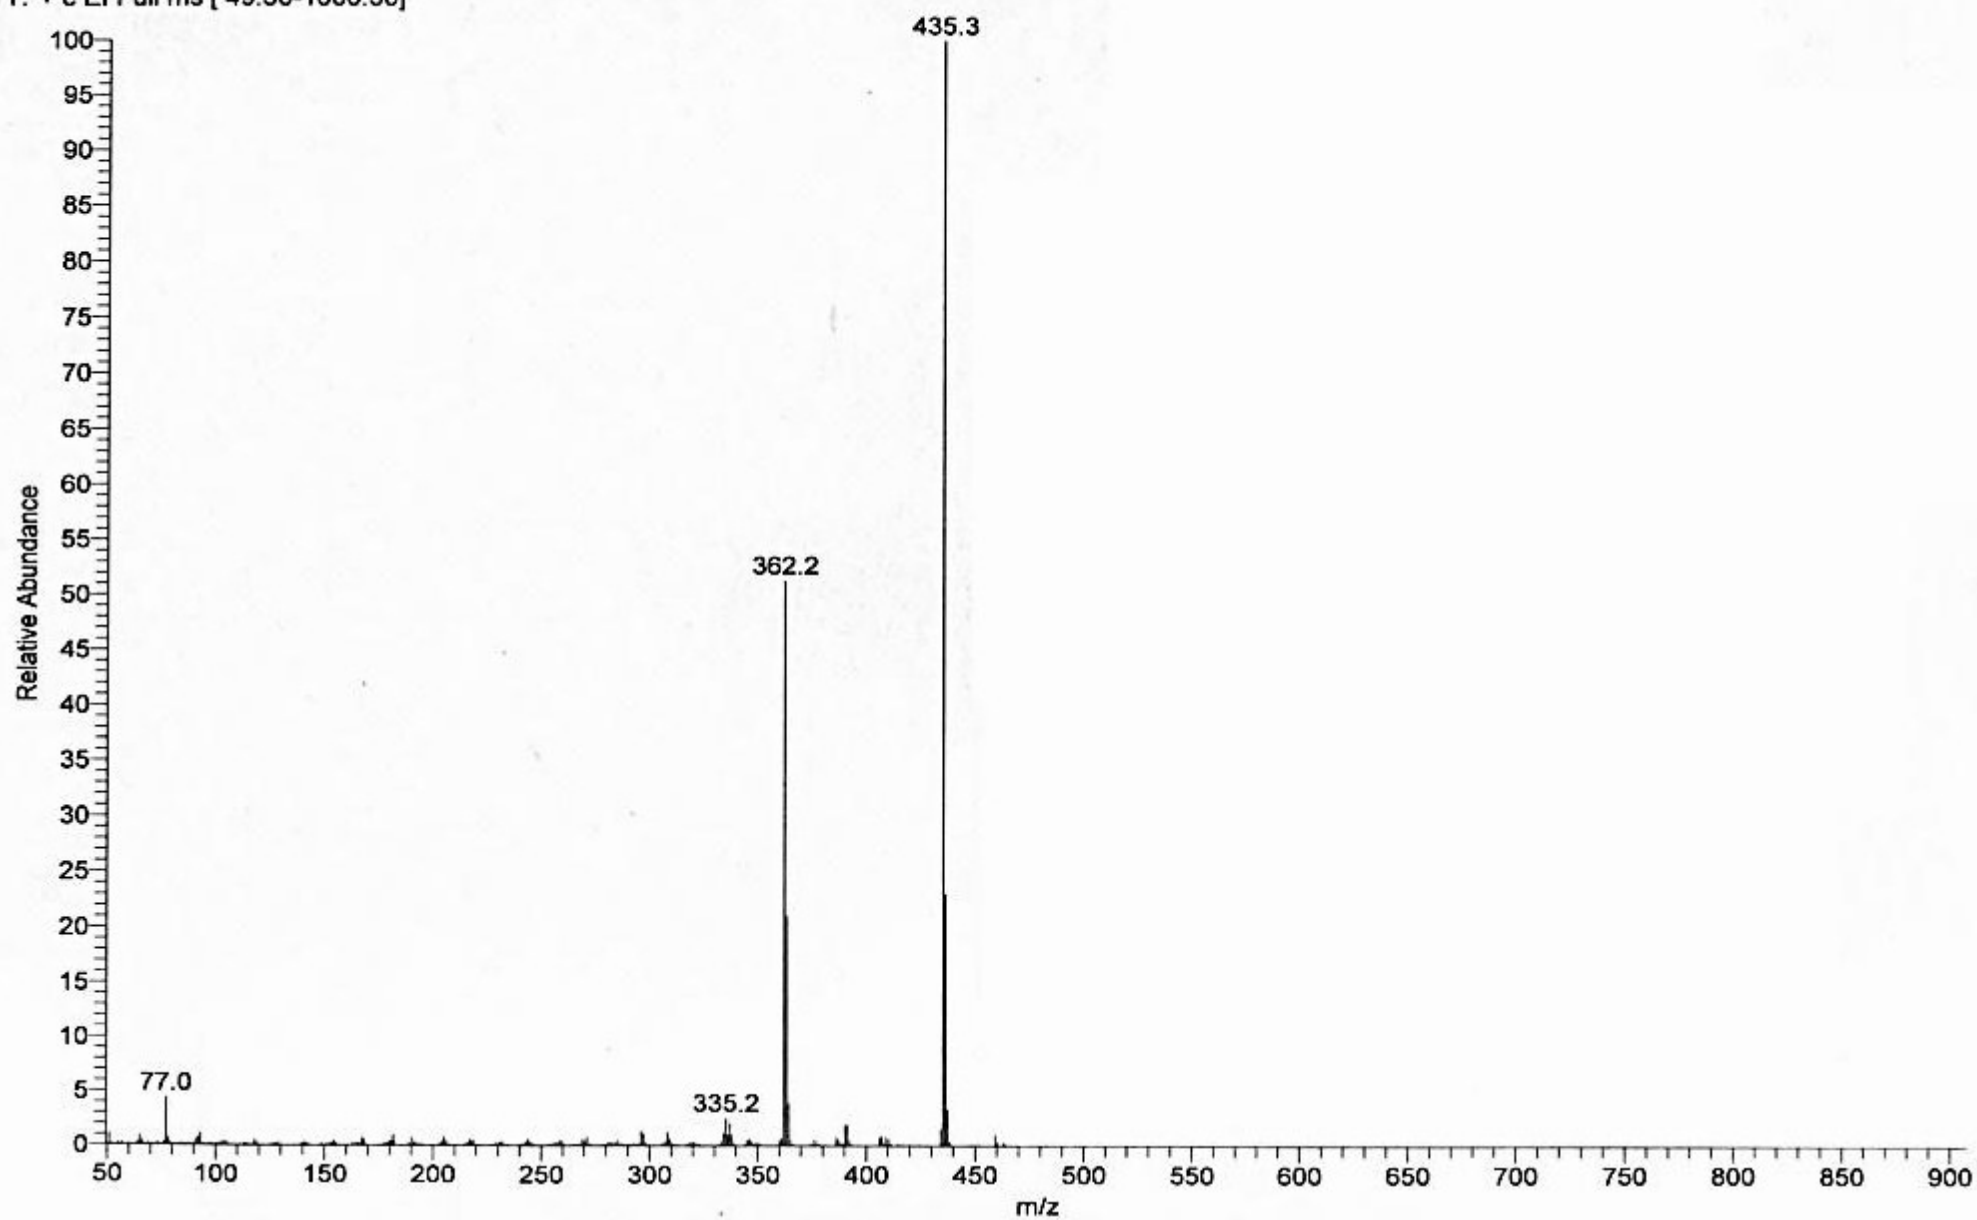

Mass spectra for the compound **9h**

HRMS-MSPyridin-c1 #23 RT: 8.55 AV: 1 NL: 8.89E5

T: + c EI Full ms [ 399.50-460.50]

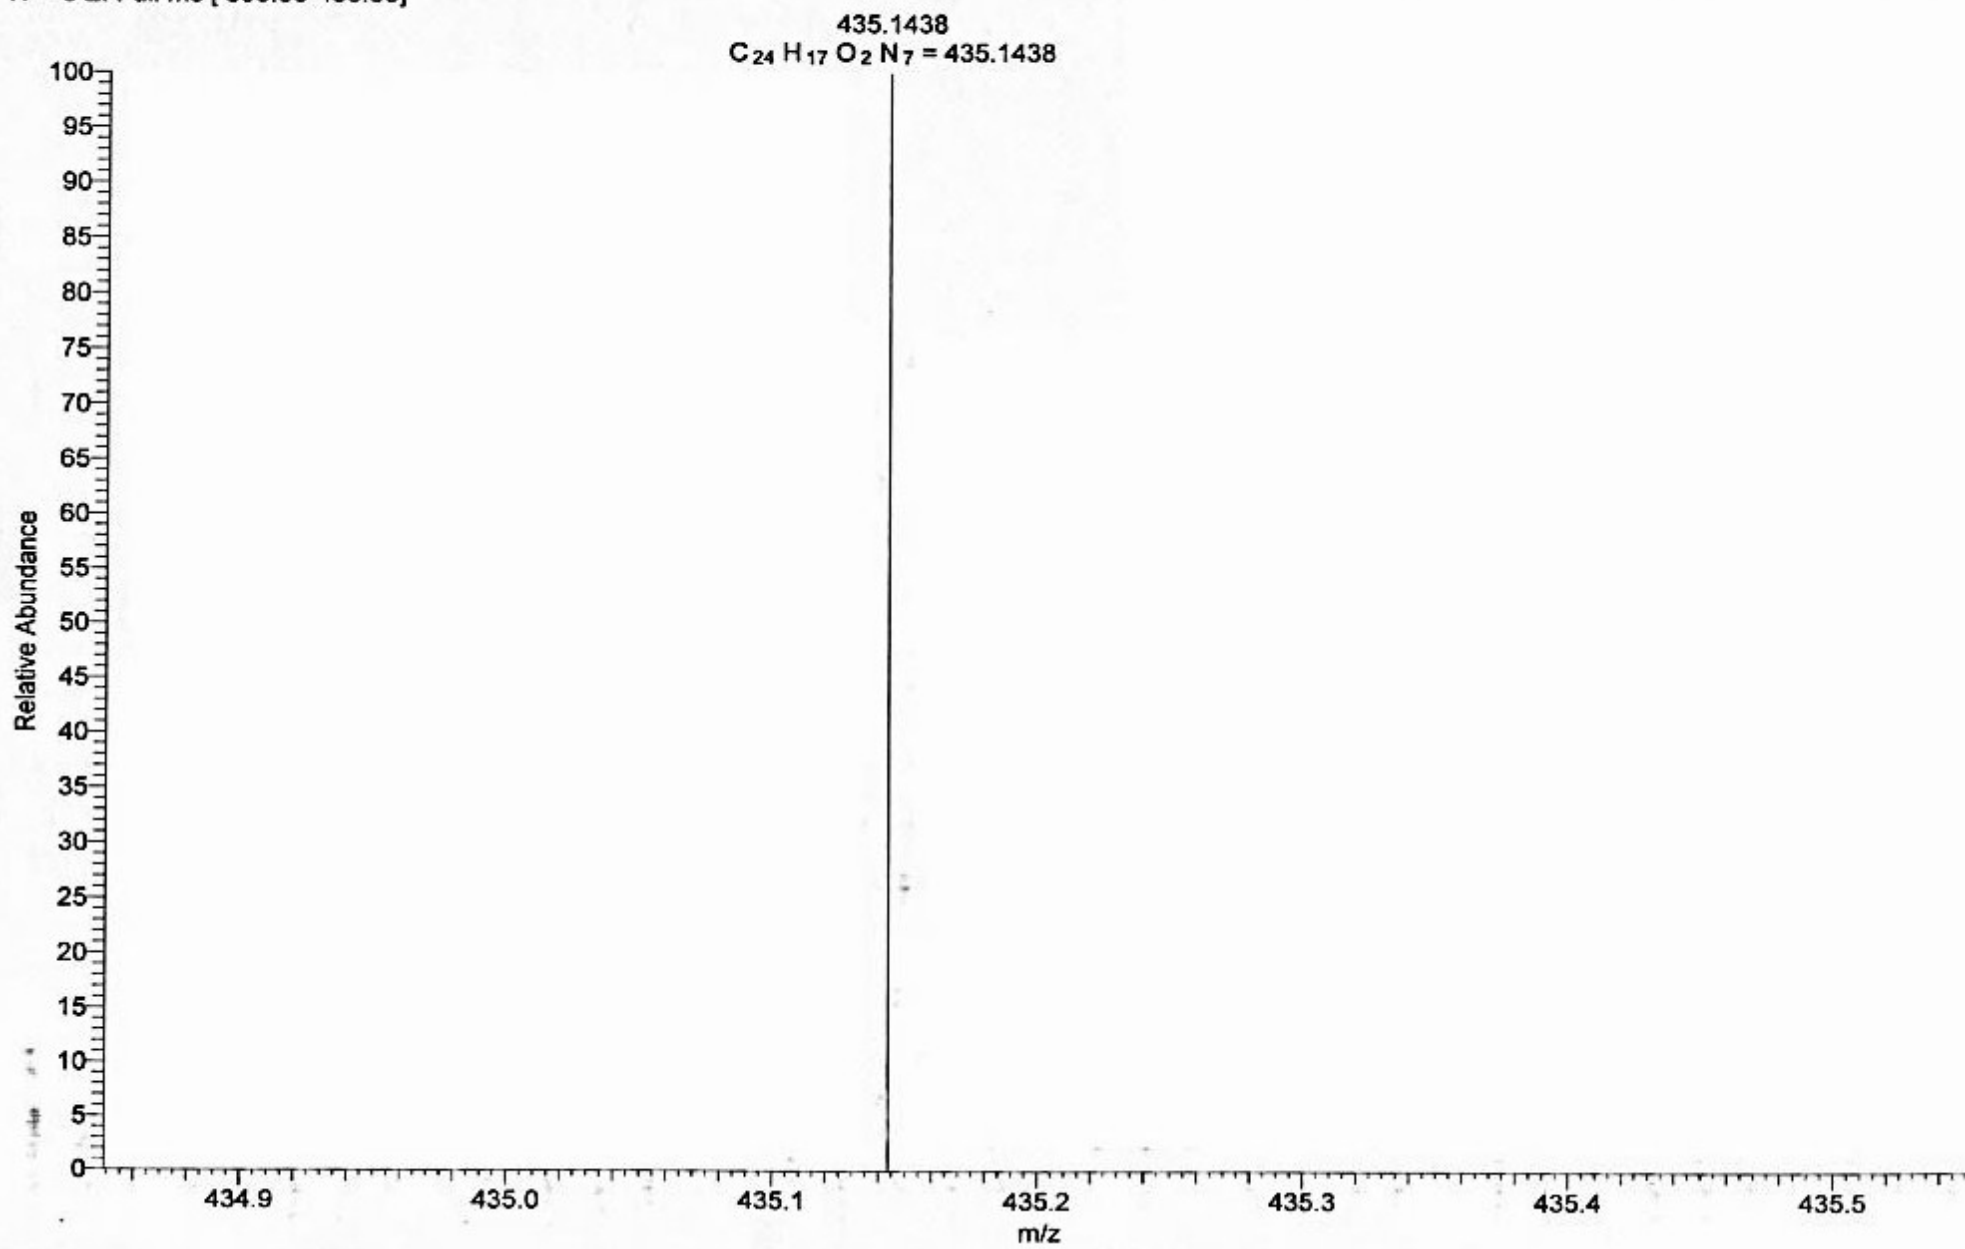

High resolution mass spectra for compound 9h



<sup>1</sup>H spectra Dr.Saleh 3H in DMSO

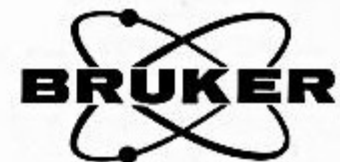

Current Data Parameters  
NAME 3H-1H  
EXPNO 1  
PROCNO 1

F2 - Acquisition Parameters  
Date\_ 20160726  
Time 9.57  
INSTRUM spect  
PROBHD 5 mm PABBO BB-  
PULPROG zg30  
TD 65536  
SOLVENT DMSO  
NS 16  
DS 2  
SWH 12335.526 Hz  
FIDRES 0.188225 Hz  
AQ 2.6563926 sec  
RG 203  
DW 40.533 usec  
DE 20.00 usec  
TE 298.0 K  
D1 1.0000000 sec  
TD0 1

----- CHANNEL f1 -----  
SF01 600.1337060 MHz  
NUC1 1H  
P1 10.60 usec  
PLW1 27.82500076 W

F2 - Processing parameters  
SI 32768  
SF 600.1300000 MHz  
WDW EM  
SSB 0  
LB 0.30 Hz  
GB 0  
PC 1.00

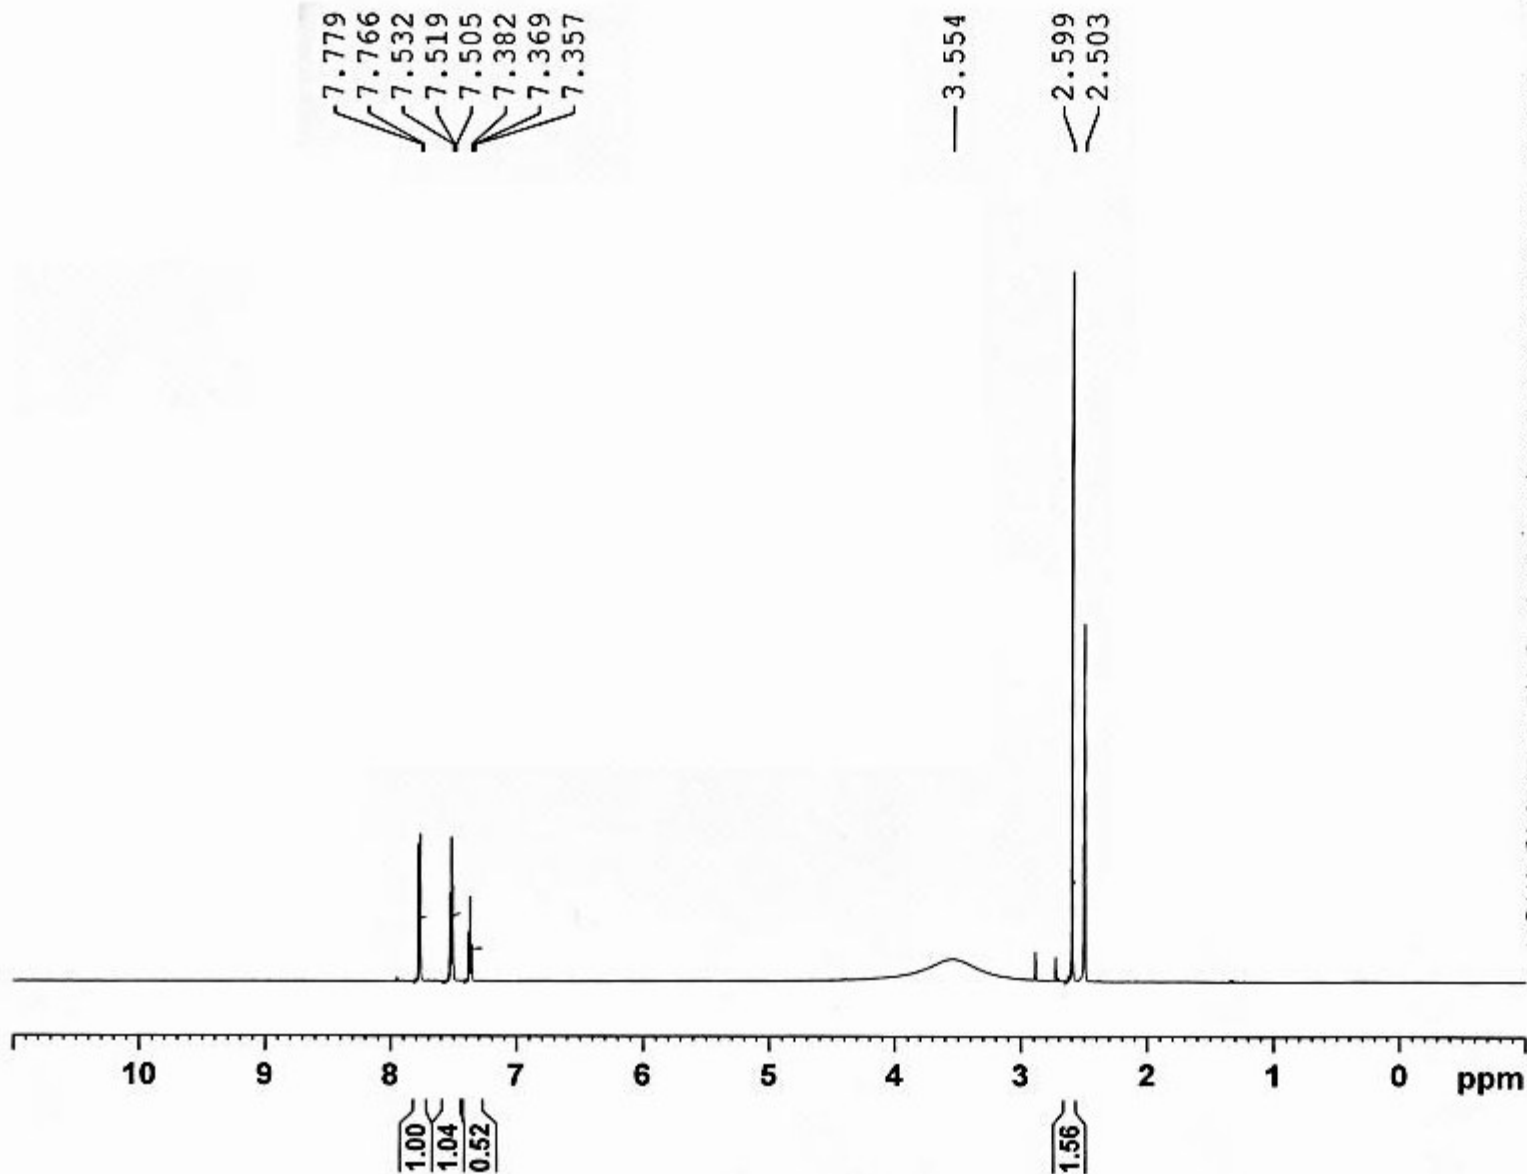

<sup>1</sup>H NMR for the compound 20

<sup>1</sup>H spectra Dr.Saleh 3H in DMSO

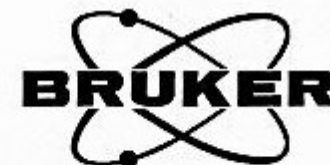

Current Data Parameters  
NAME 3H-1H  
EXPNO 1  
PROCNO 1

F2 - Acquisition Parameters  
Date\_ 20160726  
Time 9.57  
INSTRUM spect  
PROBHD 5 mm PABBO BB-  
PULPROG zg30  
TD 65536  
SOLVENT DMSO  
NS 16  
DS 2  
SWH 12335.526 Hz  
FIDRES 0.188225 Hz  
AQ 2.6563926 sec  
RG 203  
DW 40.533 usec  
DE 20.00 usec  
TE 298.0 K  
D1 1.0000000 sec  
TD0 1

----- CHANNEL f1 -----  
SFO1 600.1337060 MHz  
NUC1 1H  
P1 10.60 usec  
PLW1 27.82500076 W

F2 - Processing parameters  
SI 32768  
SF 600.1300000 MHz  
WDW EM  
SSB 0  
LB 0.30 Hz  
GB 0  
PC 1.00

7.779  
7.766  
7.532  
7.519  
7.505  
7.382  
7.369  
7.357

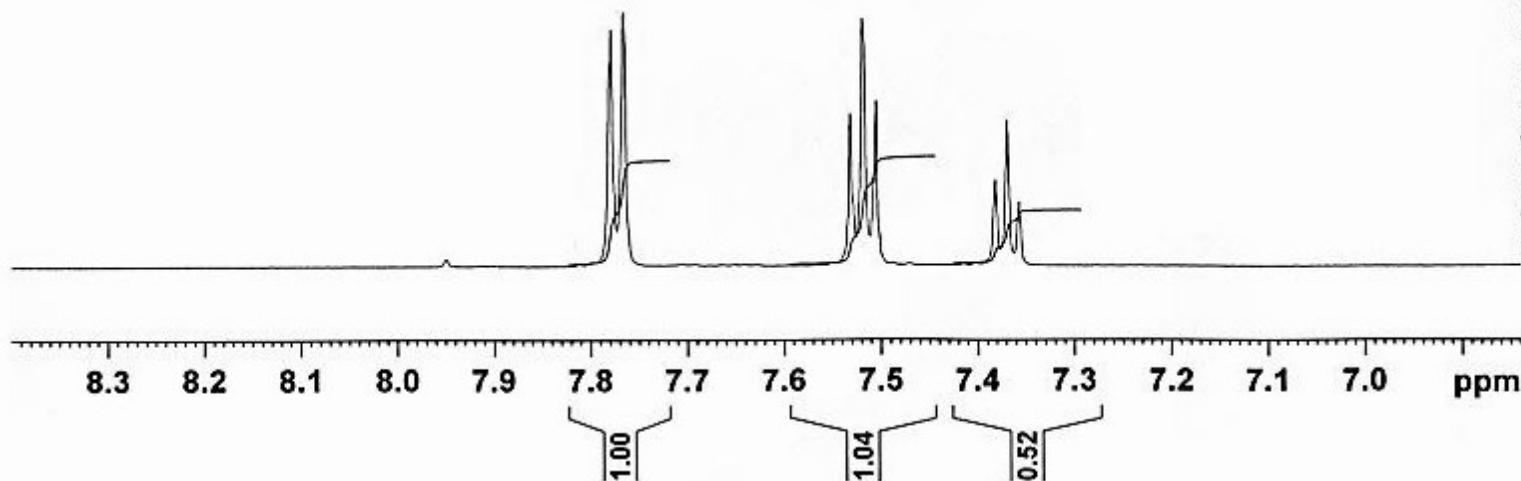

<sup>1</sup>H NMR for the compound 20

<sup>13</sup>C decoupled spectra Dr.Saleh 3H in DMSO

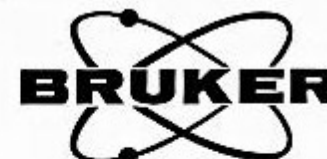

161.40  
158.77  
154.59  
141.51  
129.84  
129.69  
128.07  
124.67  
118.34  
113.81  
94.80  
53.52  
40.02  
39.90  
39.76  
39.62  
39.48  
39.34  
39.20  
39.06  
16.50

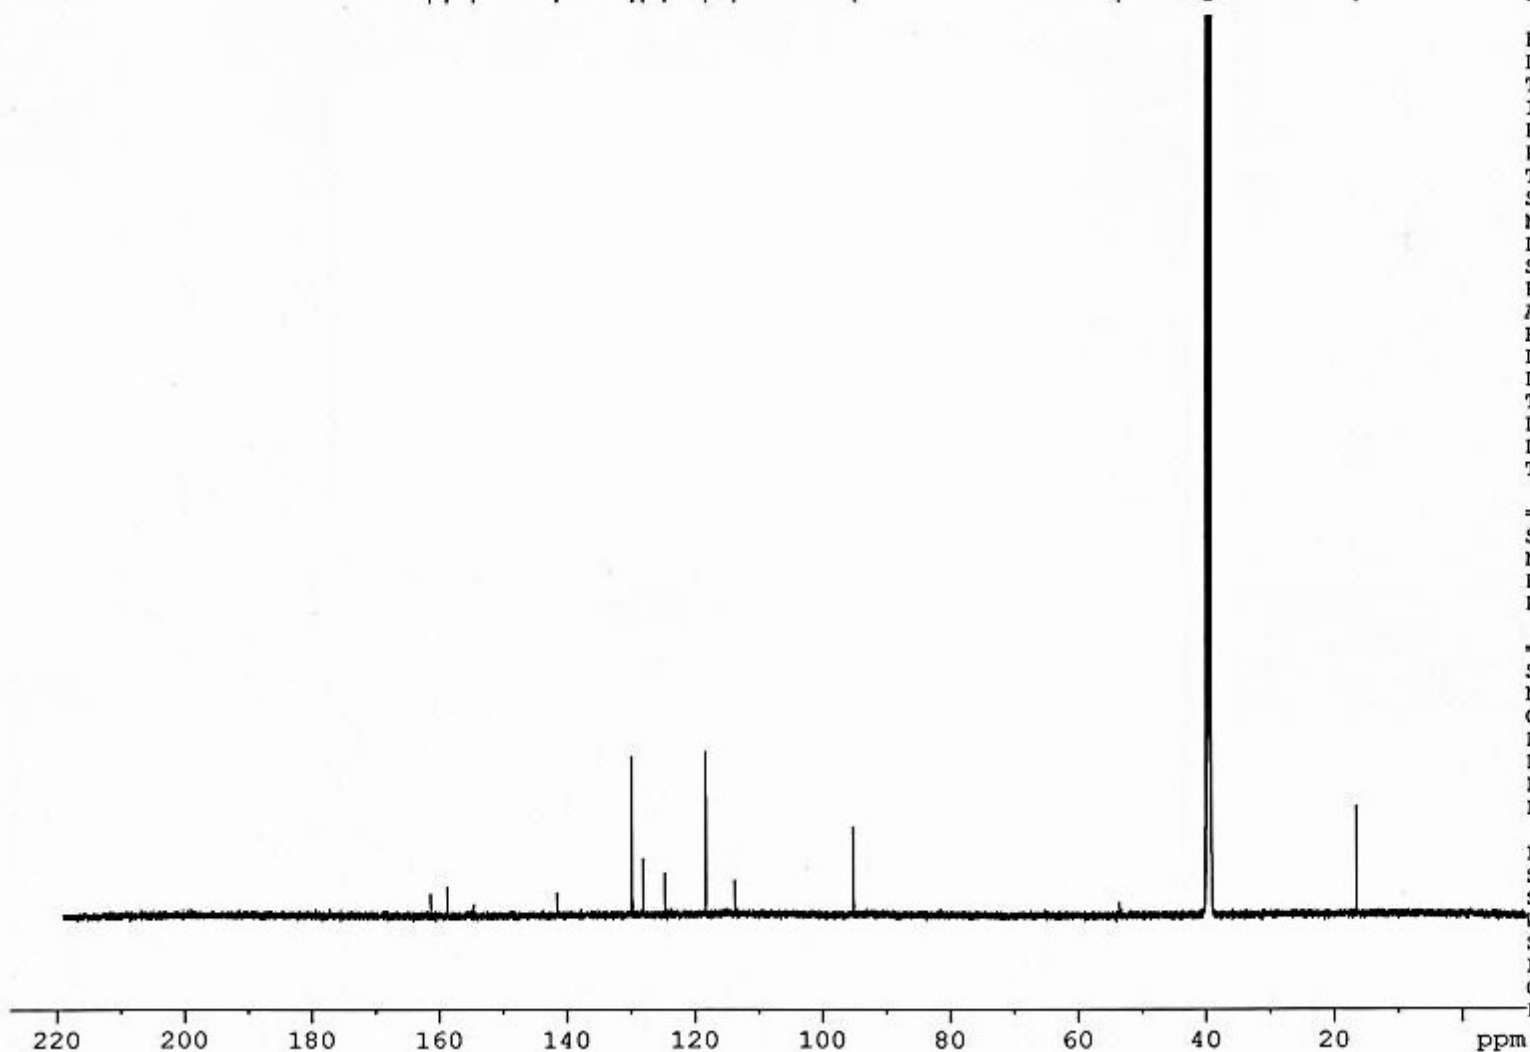

Current Data Parameters  
NAME 3H-13C  
EXPNO 1  
PROCNO 1

F2 - Acquisition Parameters  
Date\_ 20160728  
Time 22.54  
INSTRUM spect  
PROBHD 5 mm PABBO BB-  
PULPROG zgpg30  
TD 65536  
SOLVENT DMSO  
NS 10240  
DS 4  
SWH 36057.691 Hz  
FIDRES 0.550197 Hz  
AQ 0.9087659 sec  
RG 203  
DW 13.867 usec  
DE 50.00 usec  
TE 298.0 K  
D1 2.00000000 sec  
D11 0.03000000 sec  
TD0 1

===== CHANNEL f1 =====  
SFO1 150.9178979 MHz  
NUC1 13C  
P1 8.80 usec  
PLW1 78.13500214 W

===== CHANNEL f2 =====  
SFO2 600.1324005 MHz  
NUC2 1H  
CPDPRG[2] waltz65  
PCPD2 70.00 usec  
PLW2 27.82500076 W  
PLW12 0.63804001 W  
PLW13 0.31264001 W

F2 - Processing parameters  
SI 32768  
SF 150.9028834 MHz  
WDW EM  
SSB 0  
LB 1.00 Hz  
GB 0  
PC 1.40

$^{13}\text{C}$  decoupled spectra Dr.Saleh 3H in DMSO

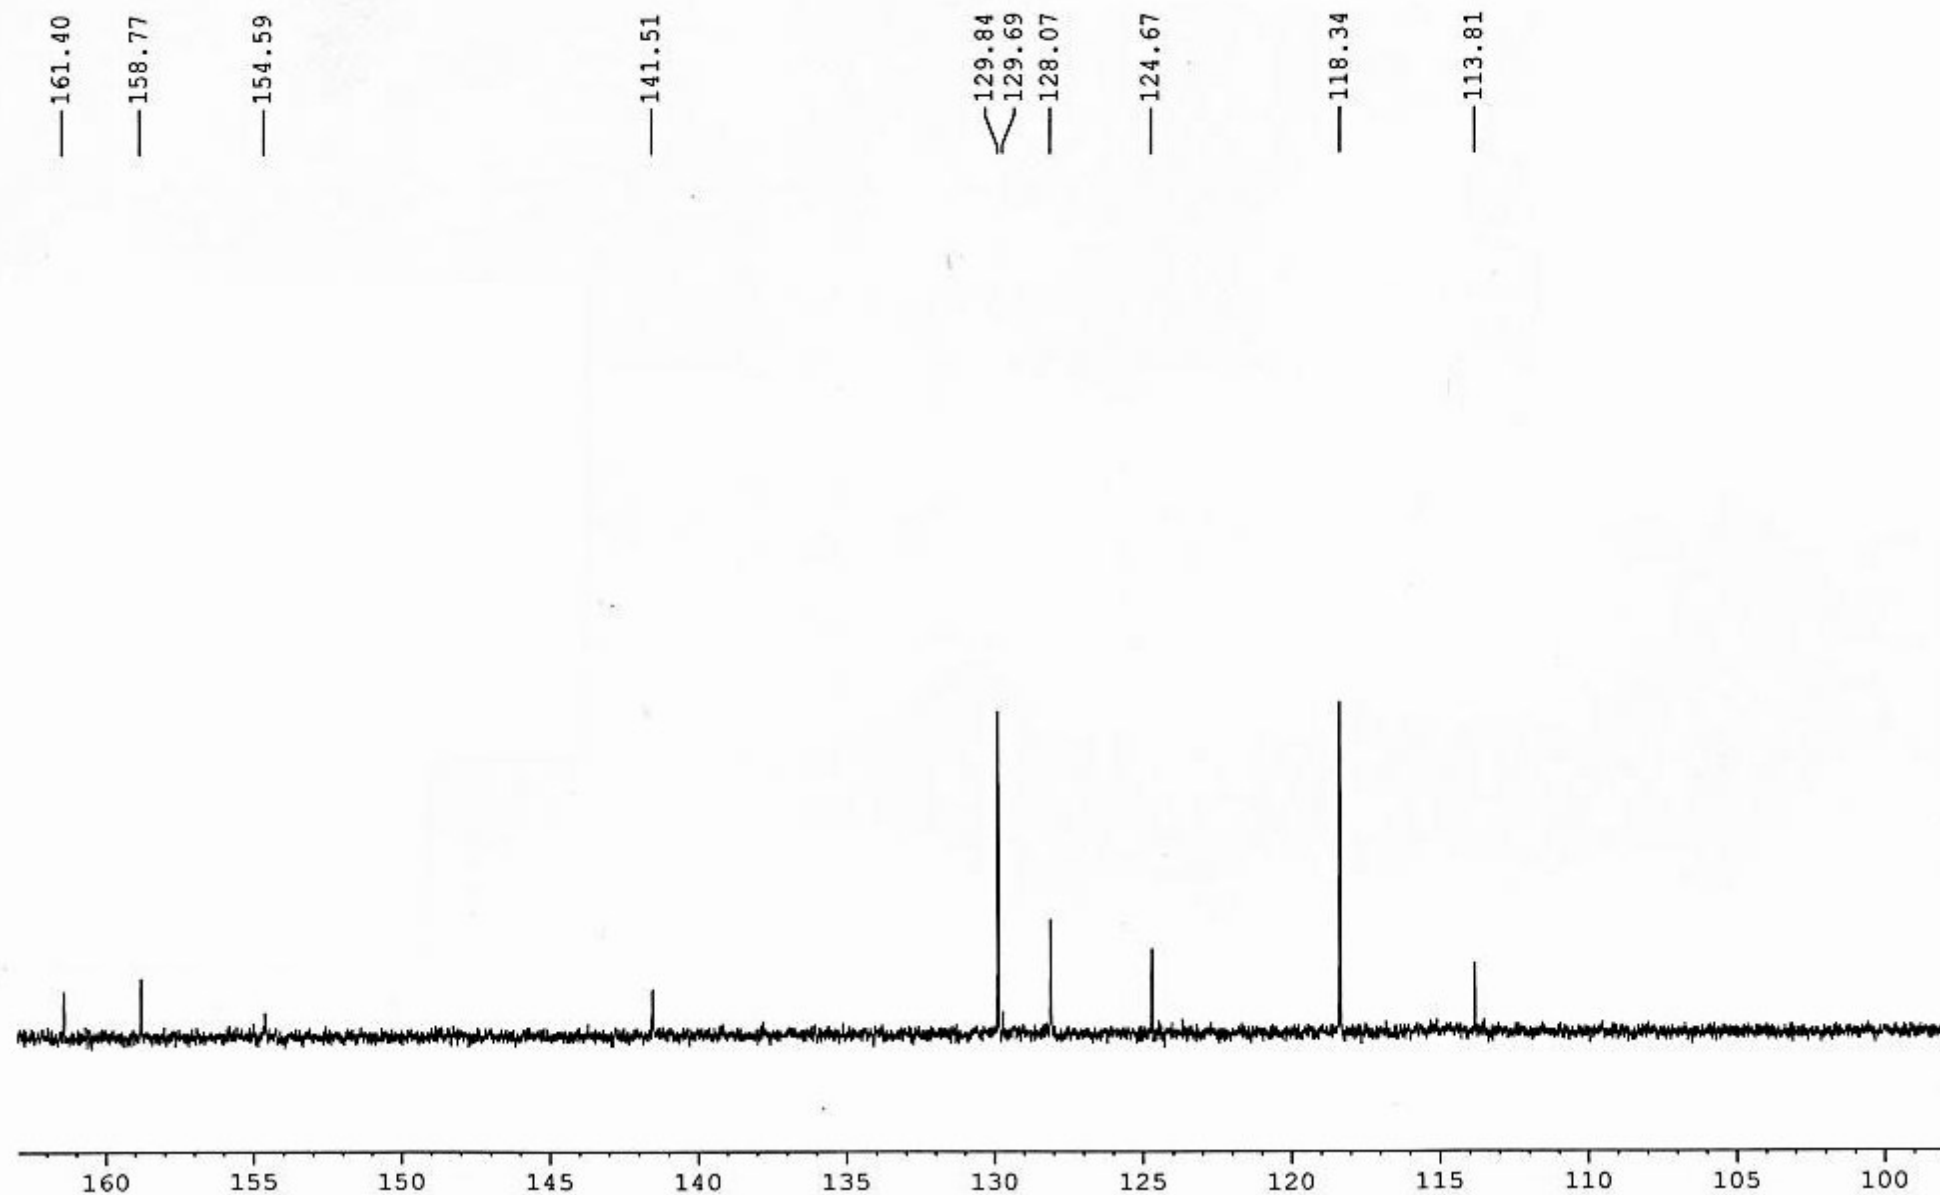

$^{13}\text{C}$  NMR for the compound **20**

C:\Xcalibur\Data\saleh\ms-Acet2  
11/23/2015 12:10:43 PM

GC MS DFS- Thermo  
Project No: GS01/03

ms-Acet2

ms-Acet2 #210 RT: 9.46 AV: 1 NL: 2.28E7  
T: + c EI Full ms [ 49.50-1000.50]

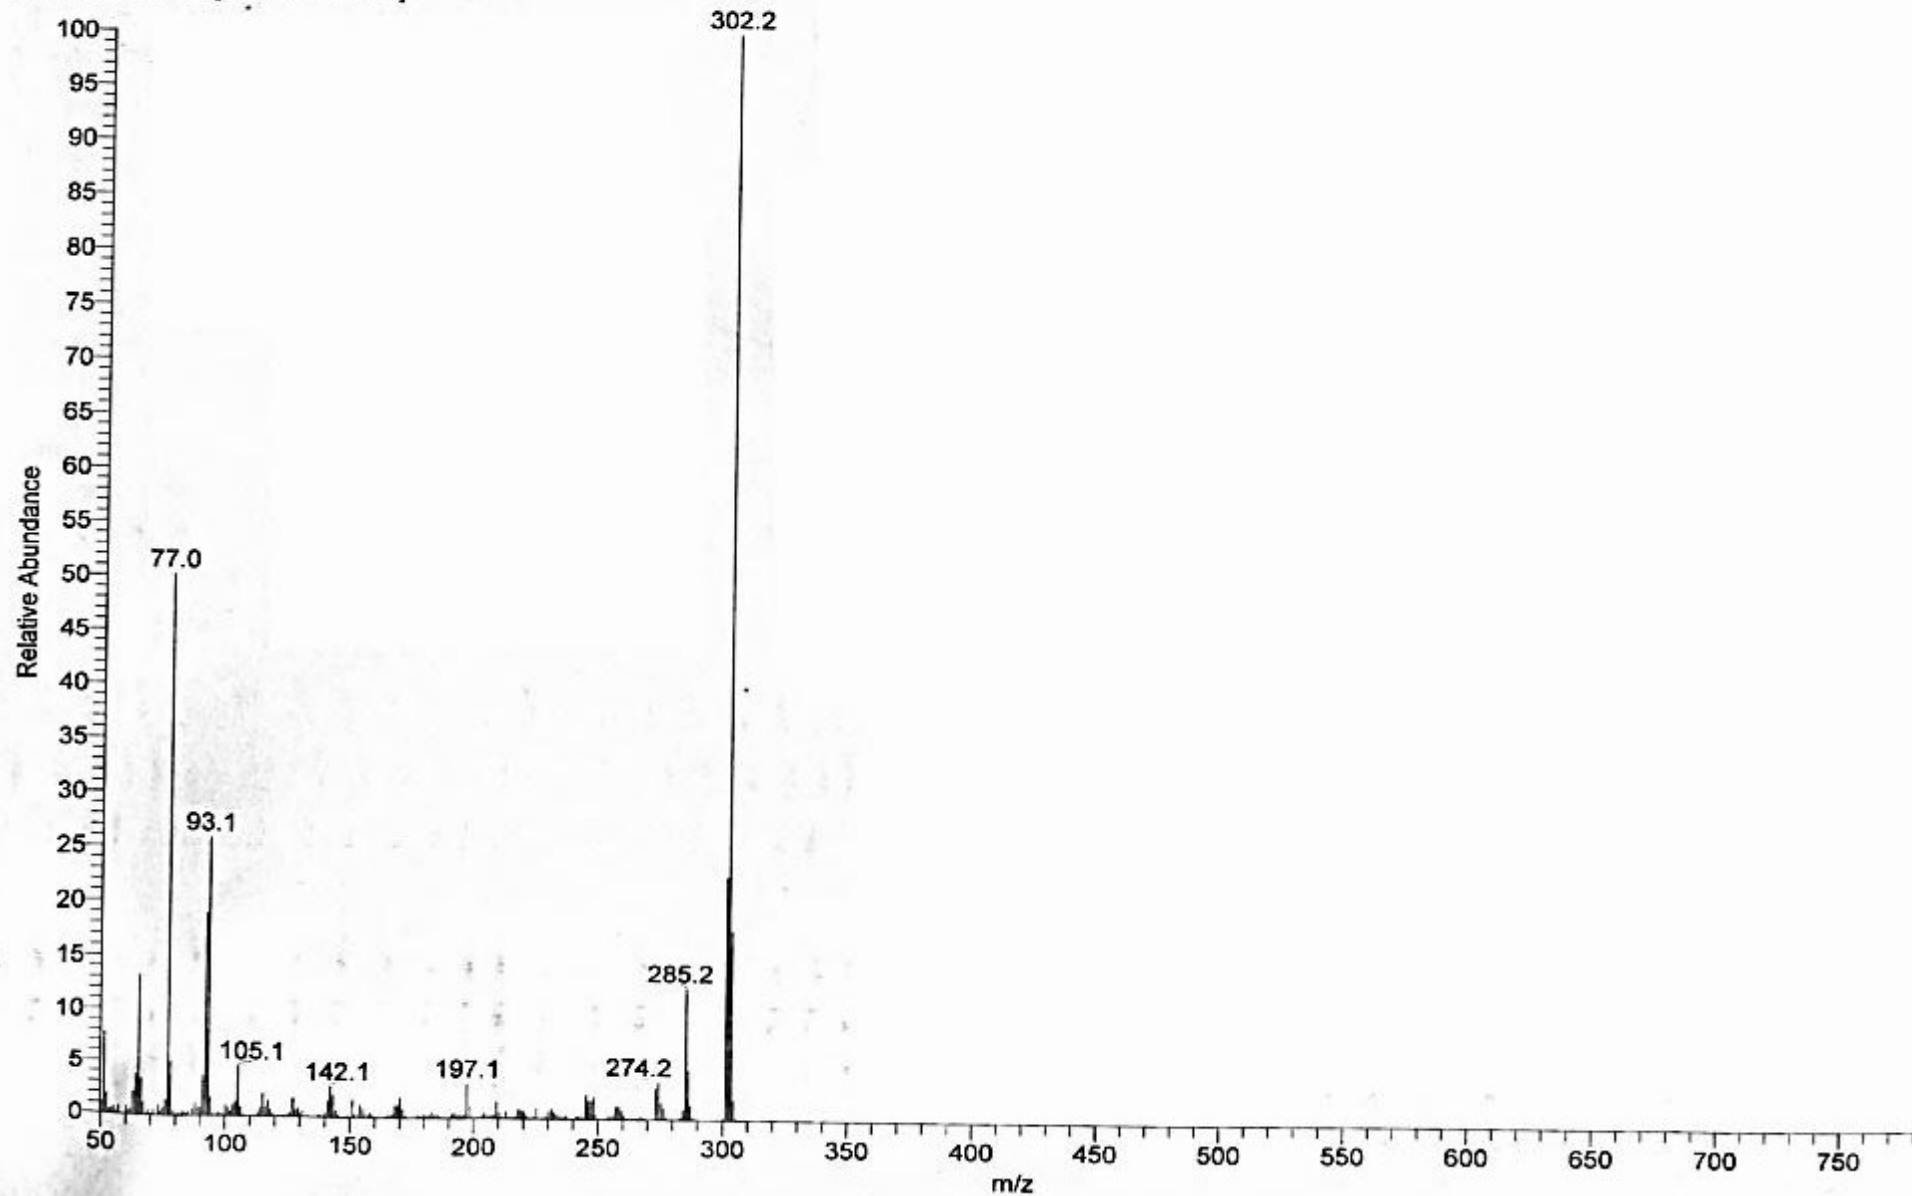

Mass spectra for the compound **20**

C:\Xcalibur\Data\saleh\HRMS-MSCYCHex-c4  
11/29/2015 2:29:20 PM

GC MS DFS- Thermo  
Project No: GS01/03

HRMS-MSCYCHex-c4 #5 RT: 7.79 AV: 1 NL: 2.29E4  
T: + c EI Full ms [ 274.50-340.50]

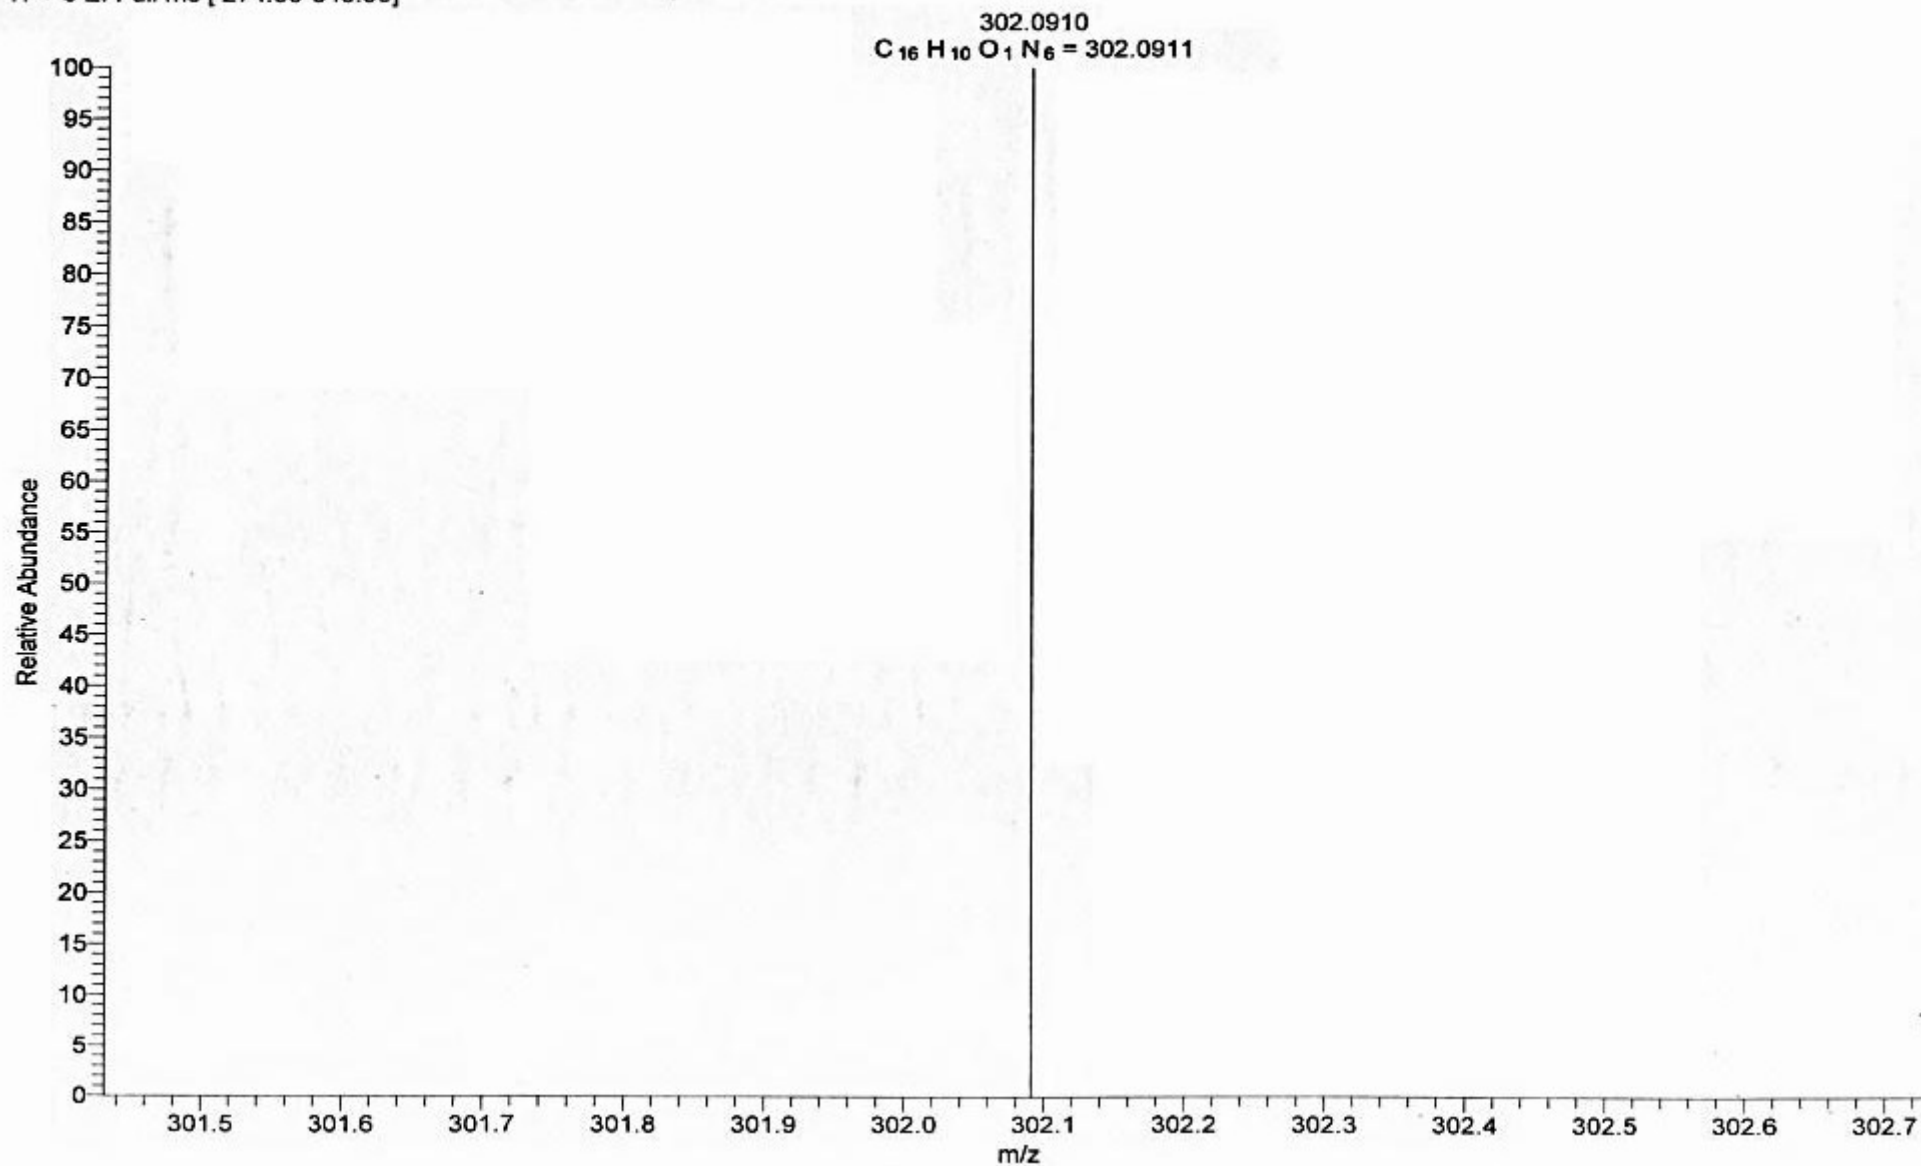

High resolution mass spectra for compound **20**

<sup>1</sup>H spectra Mostafa MS Q acetone in DMSO

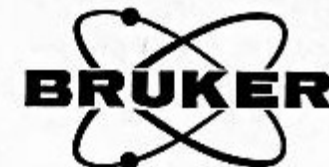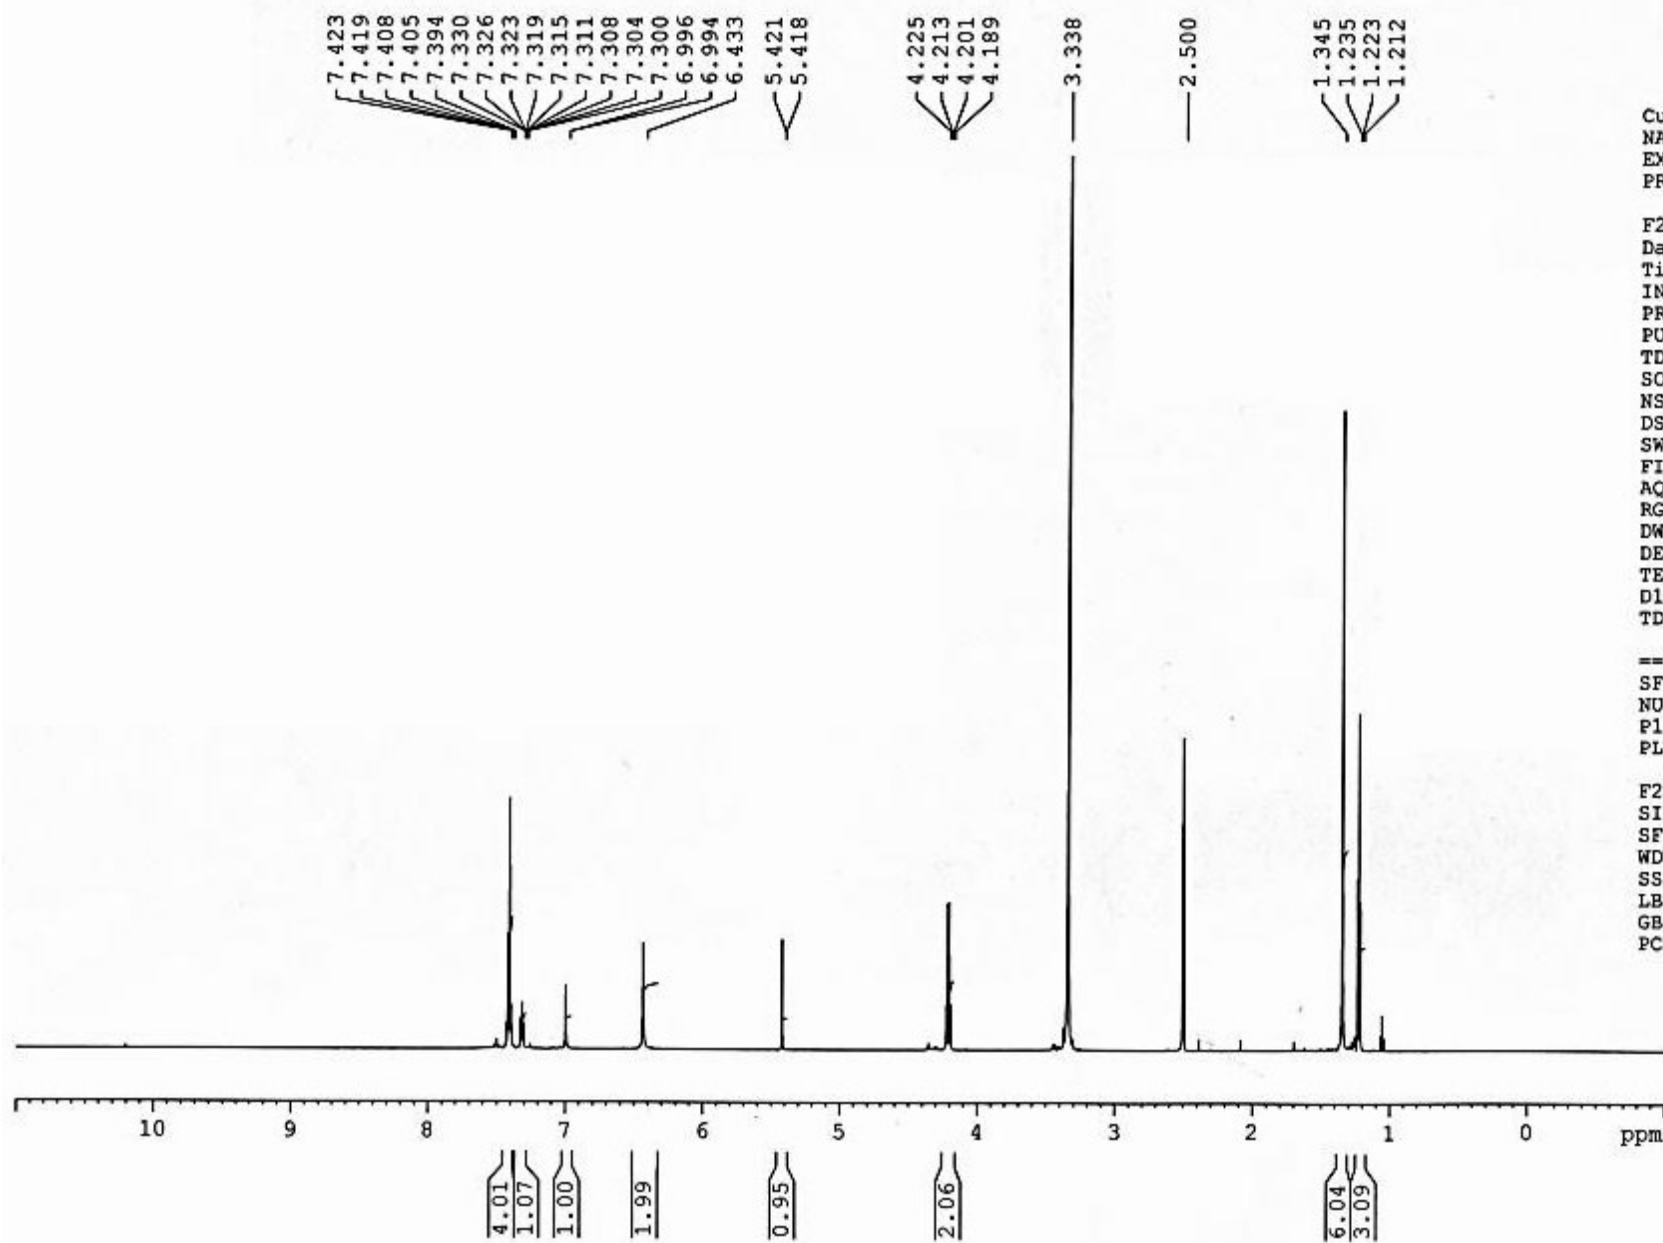

Current Data Parameters  
 NAME MSQ acetone-13C  
 EXPNO 2  
 PROCNO 1

F2 - Acquisition Parameters  
 Date\_ 20160710  
 Time\_ 11.07  
 INSTRUM spect  
 PROBHD 5 mm PABBO BB-  
 PULPROG zg30  
 TD 65536  
 SOLVENT DMSO  
 NS 16  
 DS 2  
 SWH 12335.526 Hz  
 FIDRES 0.188225 Hz  
 AQ 2.6563926 sec  
 RG 203  
 DW 40.533 usec  
 DE 20.00 usec  
 TE 298.0 K  
 D1 1.00000000 sec  
 TD0 1

===== CHANNEL f1 =====  
 SFO1 600.1337060 MHz  
 NUC1 1H  
 P1 10.60 usec  
 PLW1 27.82500076 W

F2 - Processing parameters  
 SI 32768  
 SF 600.1300074 MHz  
 WDW EM  
 SSB 0  
 LB 0.30 Hz  
 GB 0  
 PC 1.00

<sup>1</sup>H NMR for the compound 22

<sup>1</sup>H spectra Mostafa MS Q acetone in DMSO

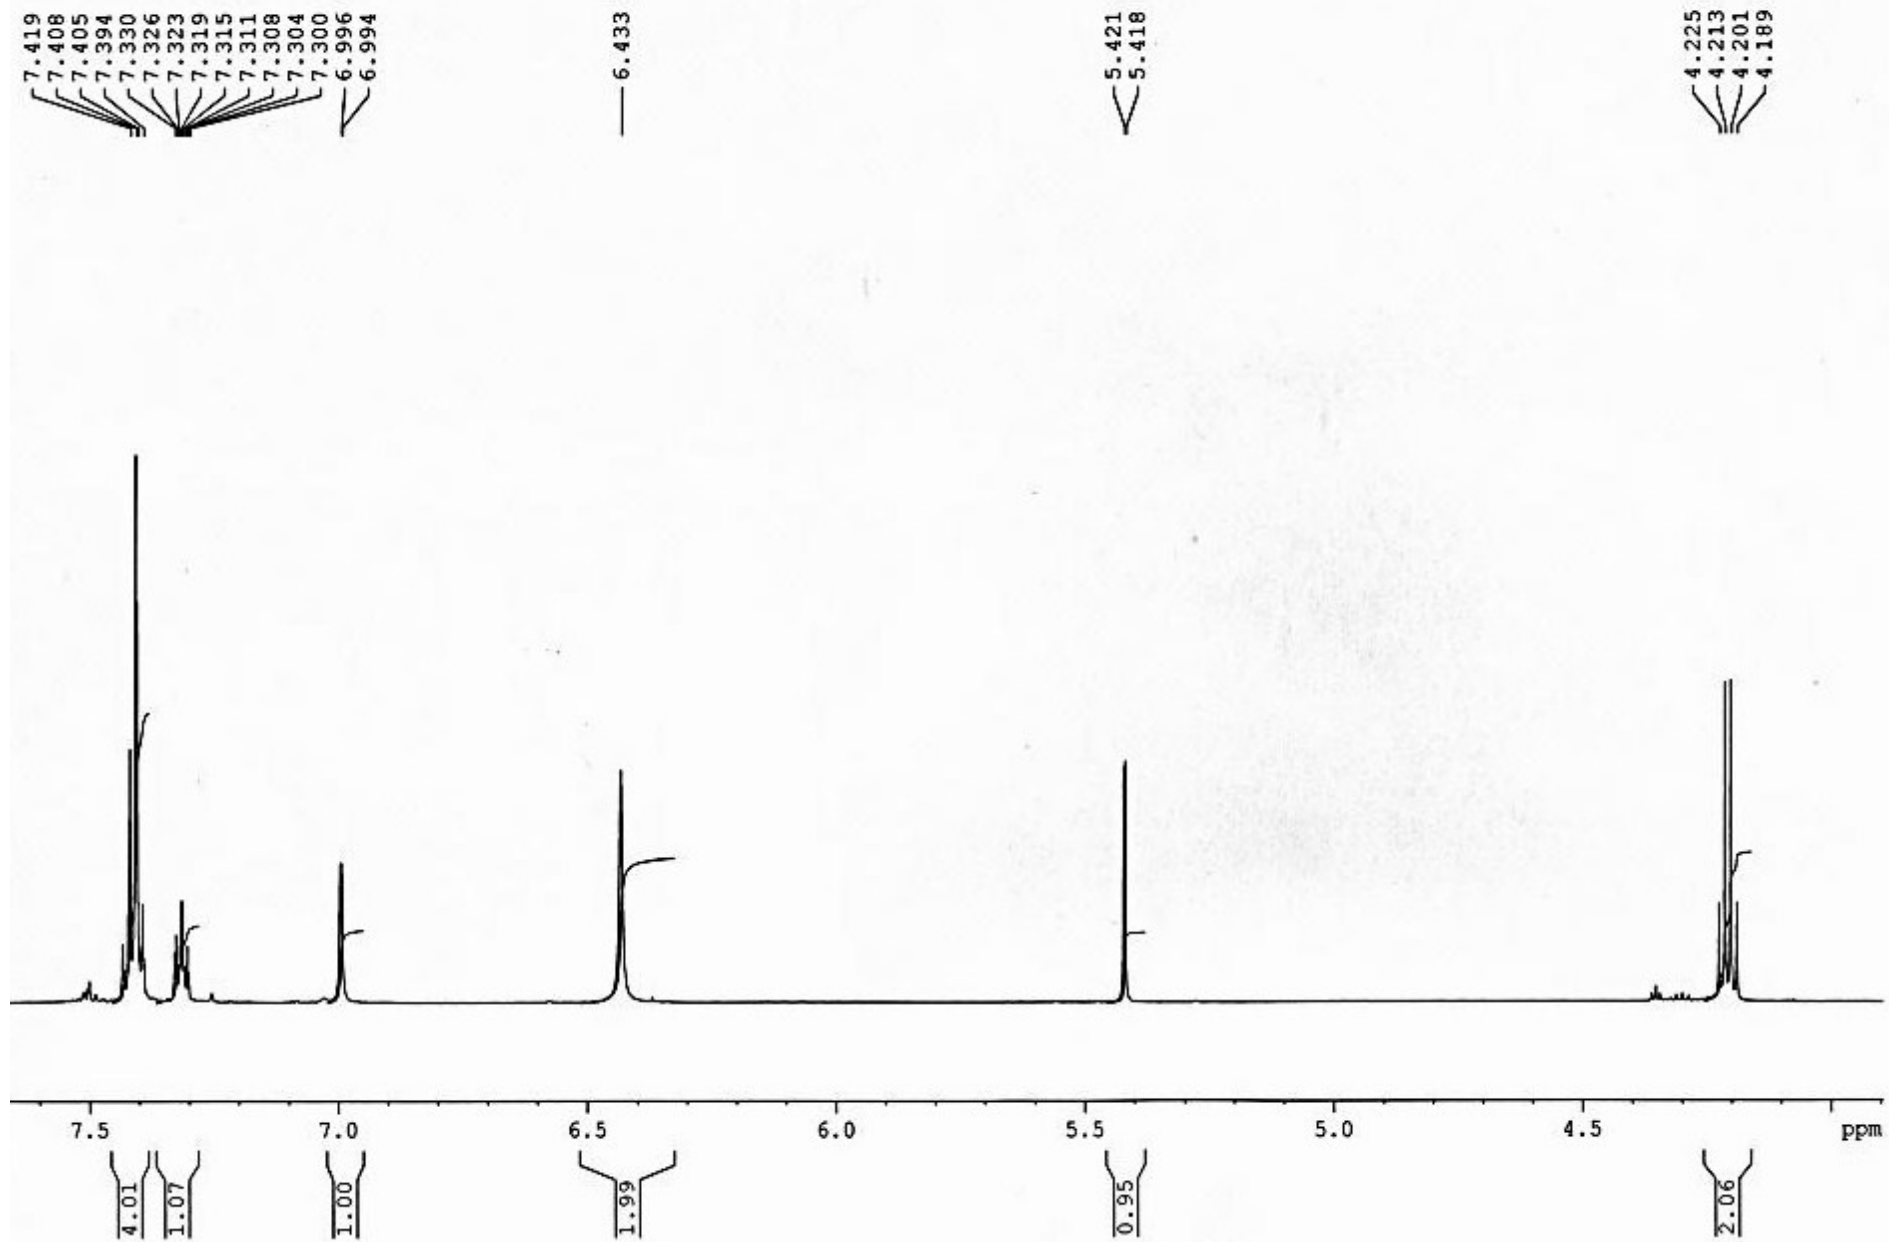

<sup>1</sup>H NMR for the compound **22**



<sup>13</sup>C decoupled spectra Mostafa MS Q acetone in DMSO

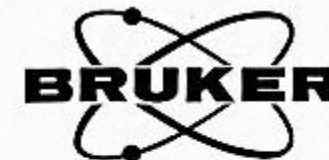

162.50  
 160.31  
 150.56  
 146.53  
 141.78  
 135.69  
 128.42  
 126.96  
 126.62  
 116.55  
 115.95  
 111.73  
 91.26  
 67.65  
 60.93  
 53.16  
 40.03  
 39.91  
 39.78  
 39.64  
 39.50  
 39.36  
 39.22  
 39.08  
 31.47  
 13.98

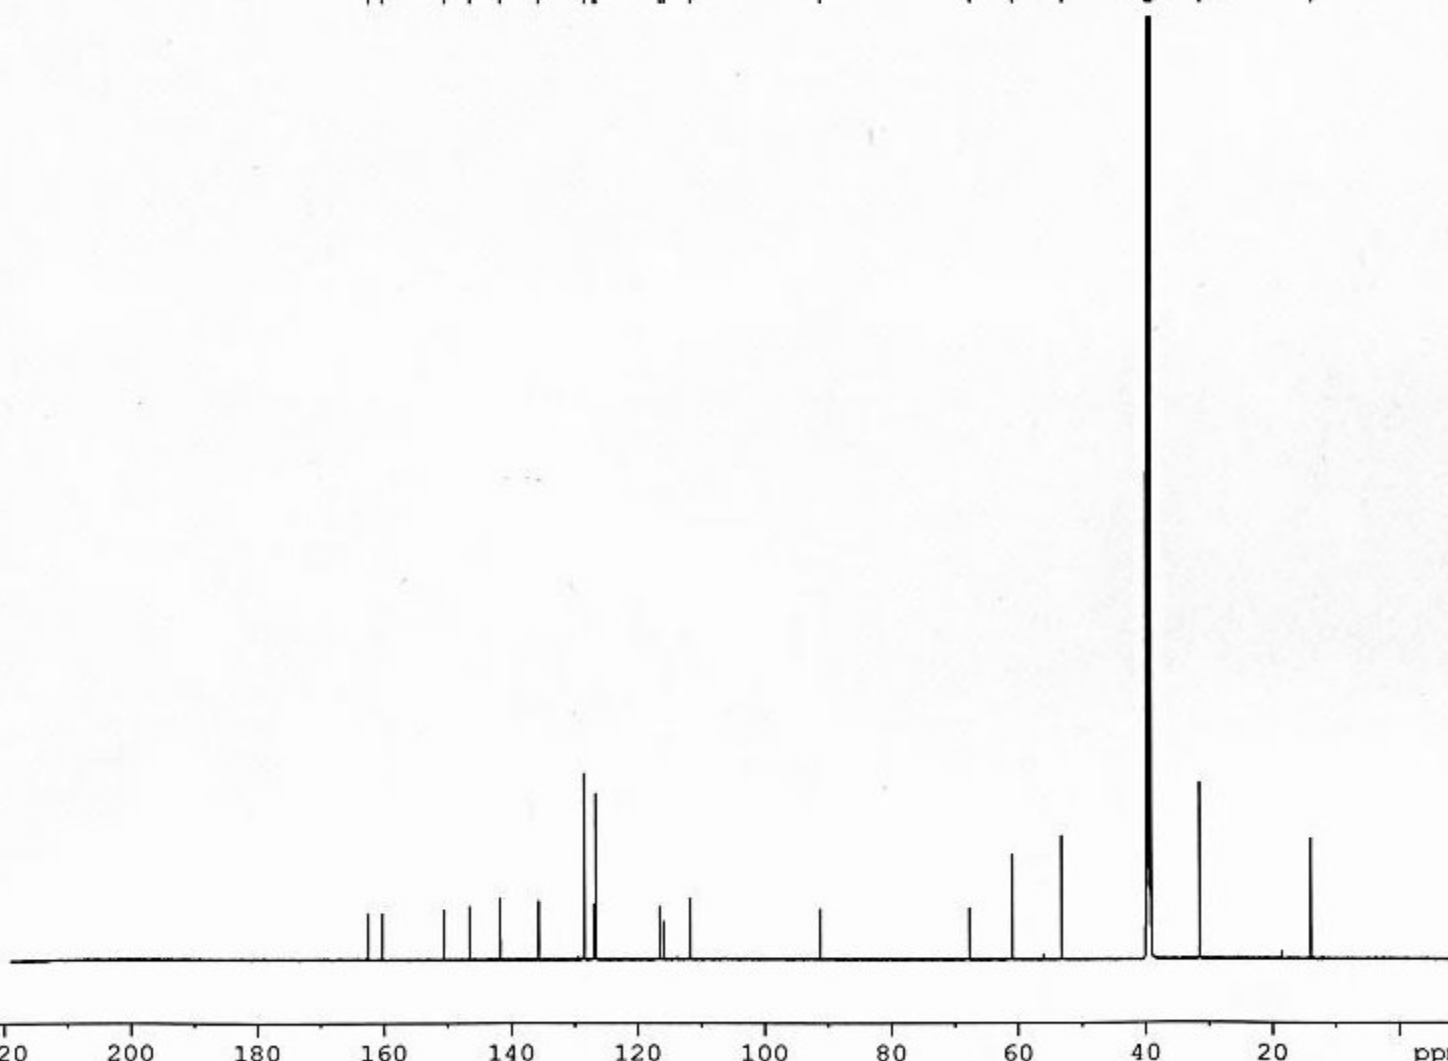

Current Data Parameters  
 NAME MSQ acetone-13C  
 EXPNO 1  
 PROCNO 1

F2 - Acquisition Parameters  
 Date\_ 20160701  
 Time\_ 23.47  
 INSTRUM spect  
 PROBHD 5 mm PABBO BB-  
 PULPROG zgpg30  
 TD 65536  
 SOLVENT DMSO  
 NS 20480  
 DS 4  
 SWH 36057.691 Hz  
 FIDRES 0.550197 Hz  
 AQ 0.9087659 sec  
 RG 203  
 DW 13.867 usec  
 DE 50.00 usec  
 TE 298.0 K  
 D1 2.00000000 sec  
 D11 0.03000000 sec  
 TDO 1

----- CHANNEL f1 -----  
 SFO1 150.9178979 MHz  
 NUC1 13C  
 P1 8.80 usec  
 PLW1 78.13500214 W

----- CHANNEL f2 -----  
 SFO2 600.1324005 MHz  
 NUC2 1H  
 CPDPRG[2] waltz65  
 PCPD2 70.00 usec  
 PLW2 27.82500076 W  
 PLW12 0.63804001 W  
 PLW13 0.31264001 W

F2 - Processing parameters  
 SI 32768  
 SF 150.9028830 MHz  
 WDW EM  
 SSB 0  
 LB 1.00 Hz  
 GB 0  
 PC 1.40

<sup>13</sup>C NMR for the compound 22

<sup>13</sup>C decoupled spectra Mostafa MS Q acetone in DMSO

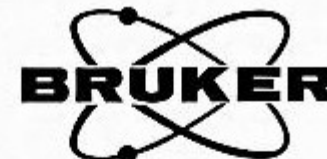

Current Data Parameters  
 NAME MSQ acetone-13C  
 EXPNO 1  
 PROCNO 1

F2 - Acquisition Parameters  
 Date\_ 20160701  
 Time\_ 23.47  
 INSTRUM spect  
 PROBHD 5 mm PABBO BB-  
 PULPROG zgpg30  
 TD 65536  
 SOLVENT DMSO  
 NS 20480  
 DS 4  
 SWH 36057.691 Hz  
 FIDRES 0.550197 Hz  
 AQ 0.9087659 sec  
 RG 203  
 DW 13.867 usec  
 DE 50.00 usec  
 TE 298.0 K  
 D1 2.00000000 sec  
 D11 0.03000000 sec  
 TDO 1

----- CHANNEL f1 -----  
 SFO1 150.9178979 MHz  
 NUC1 13C  
 P1 8.80 usec  
 PLW1 78.13500214 W

----- CHANNEL f2 -----  
 SFO2 600.1324005 MHz  
 NUC2 1H  
 CPDPRG[2] waltz65  
 PCPD2 70.00 usec  
 PLW2 27.82500076 W  
 PLW12 0.63804001 W  
 PLW13 0.31264001 W

F2 - Processing parameters  
 SI 32768  
 SF 150.9028830 MHz  
 WDW EM  
 SSB 0  
 LB 1.00 Hz  
 GB 0  
 PC 1.40

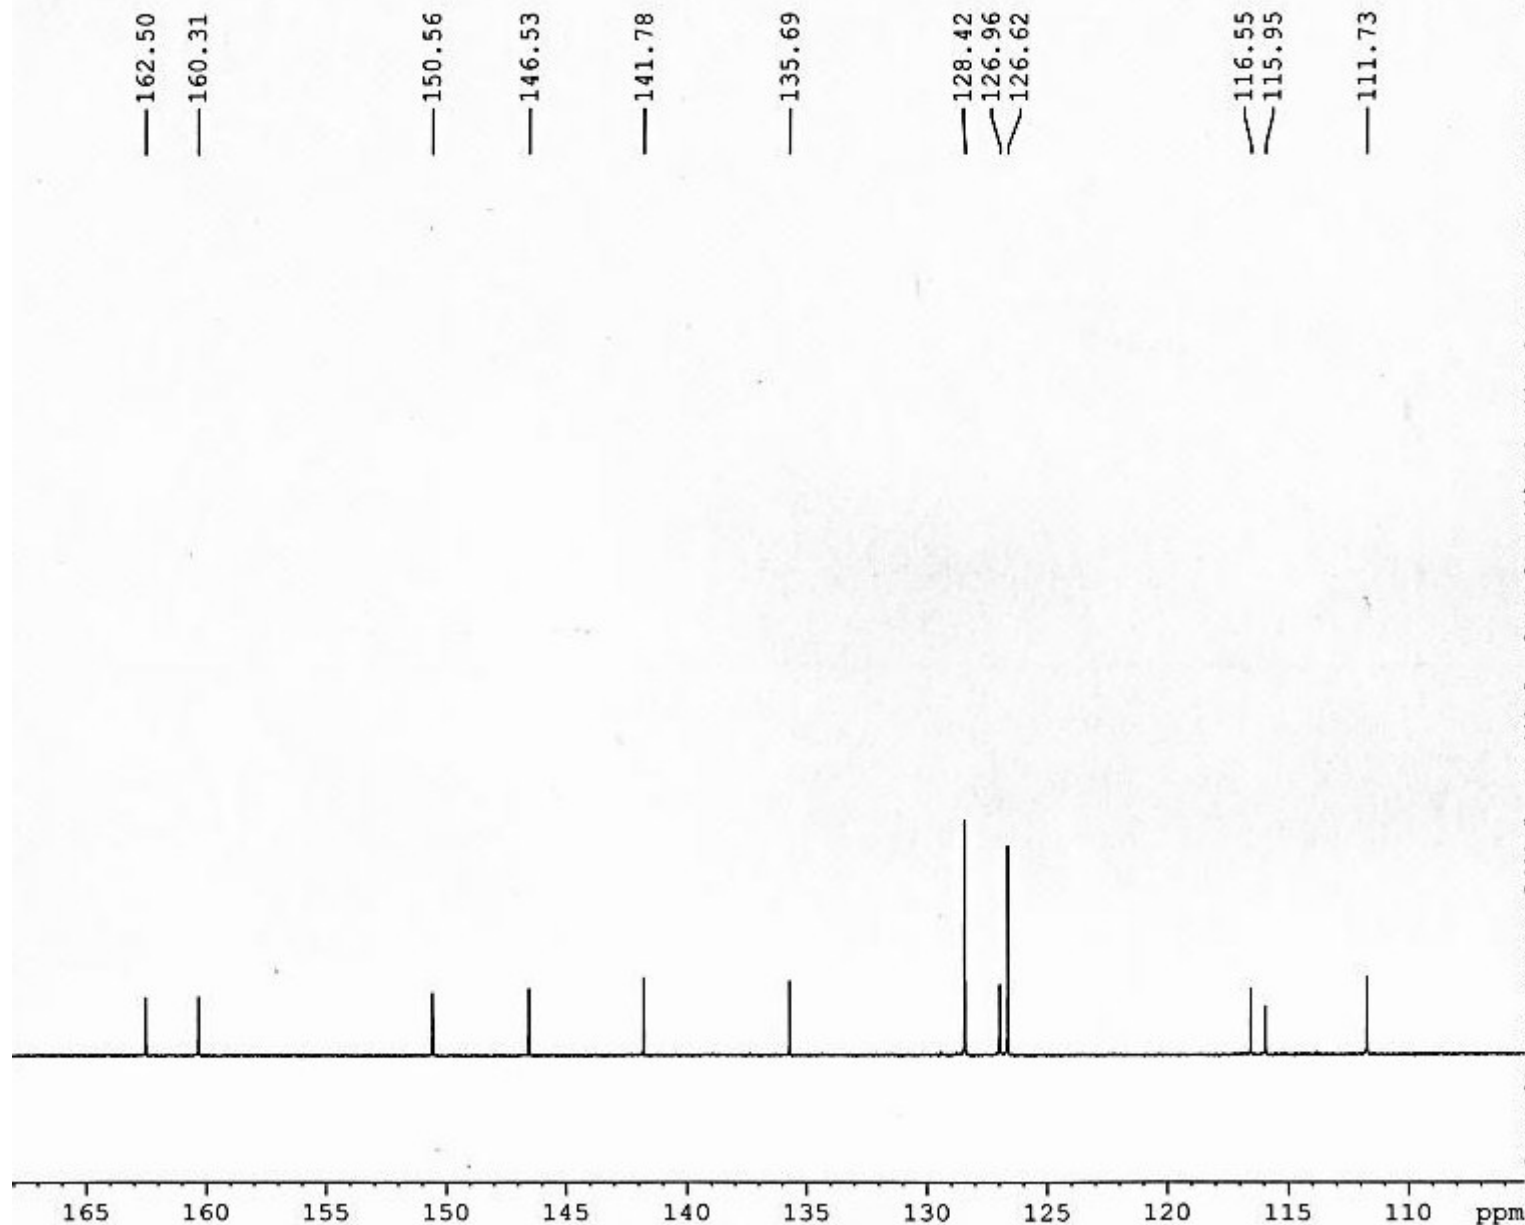

<sup>13</sup>C NMR for the compound 22

AcetoneQutub #149 RT: 6.76 AV: 1 NL: 2.70E6  
T: + c EI Full ms [ 49.50-1000.50]

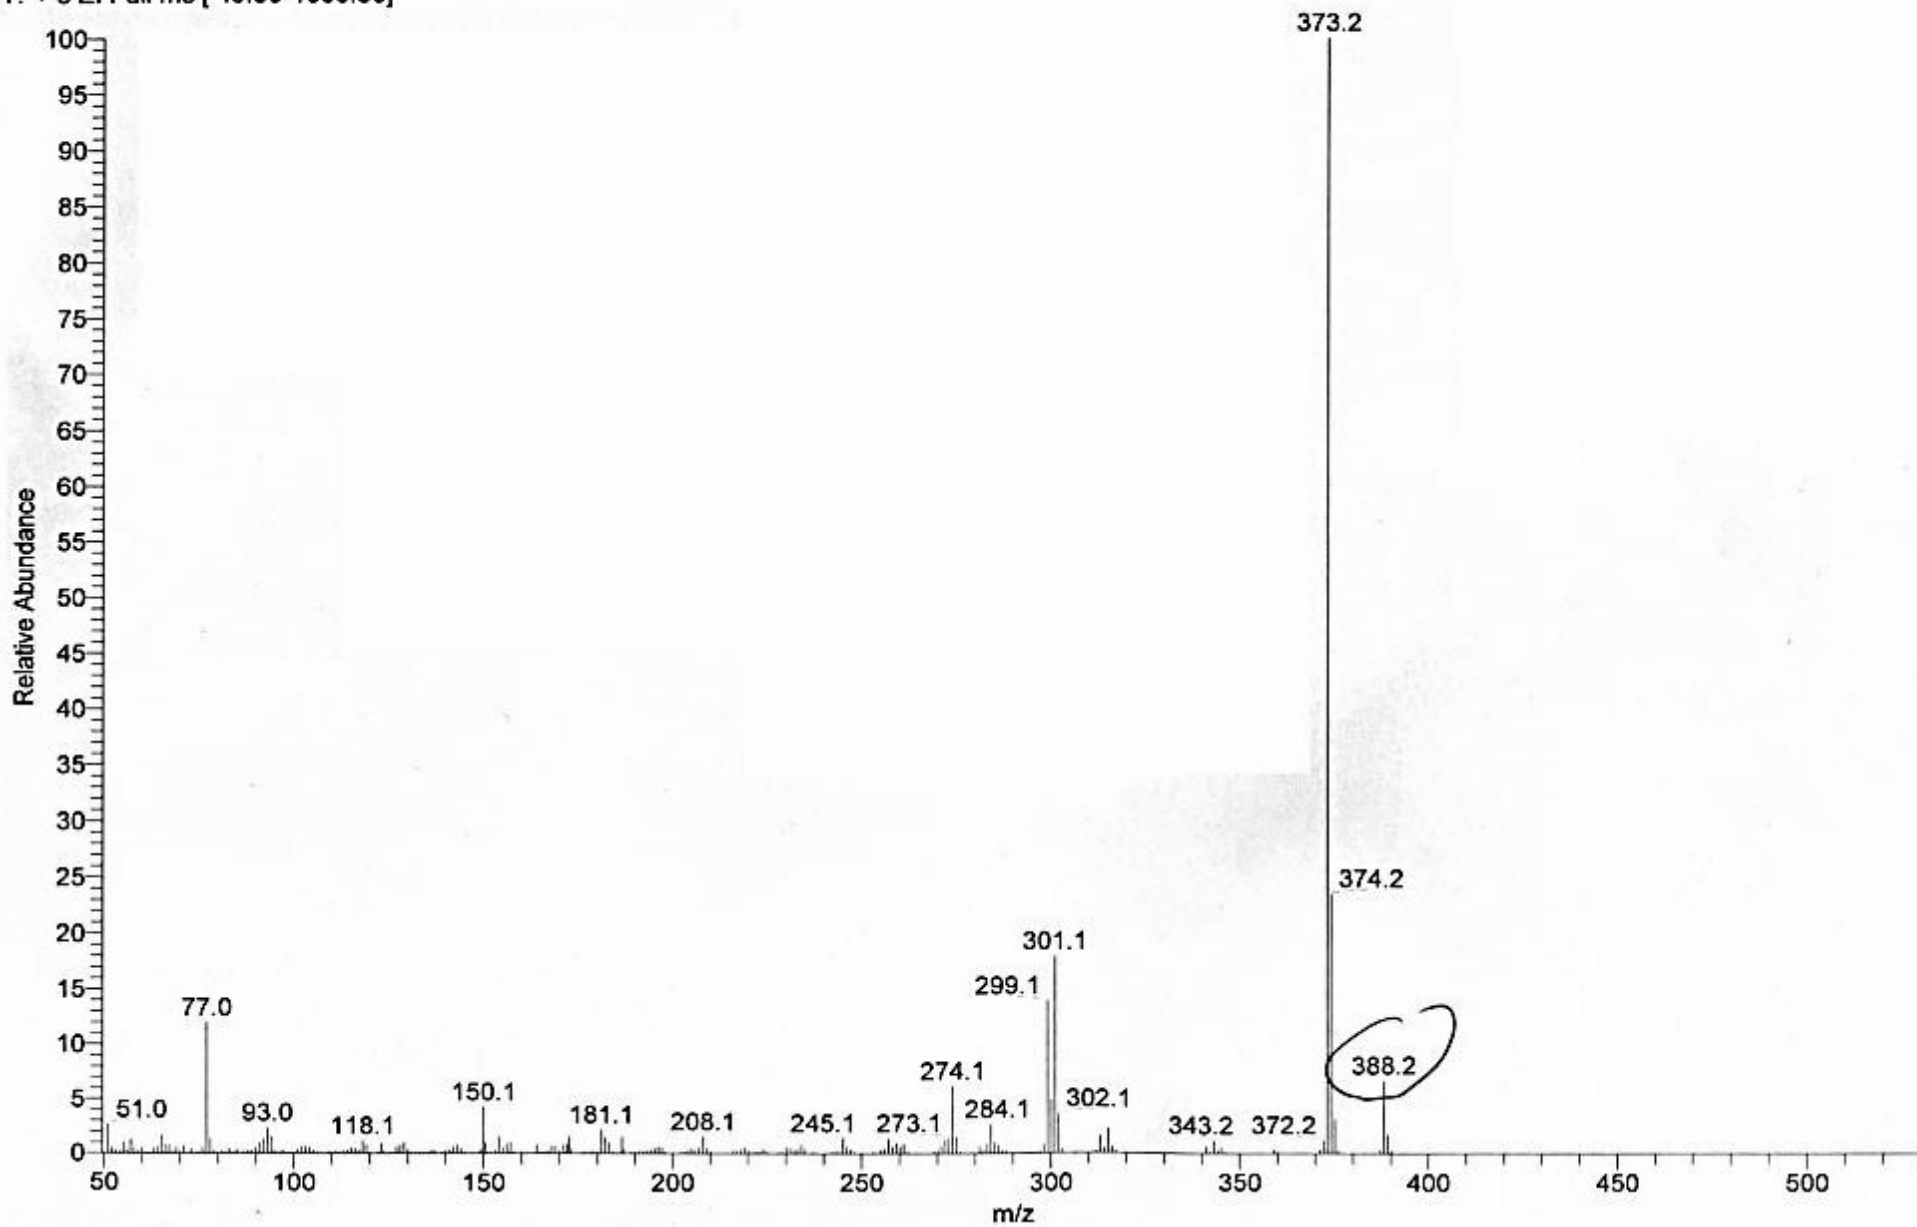

Mass spectra for the compound **22**
